# Supplementary material for: An RNA-sequencing-based transcriptome for a significantly prognostic novel driver signature identification in bladder urothelial carcinoma
Source: PeerJ. 2020 Jul 21;8:e9422. doi: 10.7717/peerj.9422 (PMC7380276; doi:10.7717/peerj.9422)
Supplement: Supplemental Information 6 [file peerj-08-9422-s006.xlsx]

## Sheet: PCGs
Table S1: Univariate Cox regression analysis of PCGs, lncRNAs and microRNAs in the training set (n = 200).
PCGs	coefficient	se	z	p	HR	HRse	HRz	HRp	HRCILL	HRCIUL	log_rank_p
GAPDH	0.439	0.214	2.045	0.041	1.55	0.333	1.655	0.098	1.018	2.361	0.0393735
COL3A1	0.461	0.219	2.105	0.035	1.585	0.347	1.687	0.092	1.032	2.434	0.0334654
HSPA8	0.49	0.216	2.274	0.023	1.632	0.352	1.797	0.072	1.07	2.491	0.0215395
SPARC	0.448	0.216	2.076	0.038	1.565	0.338	1.673	0.094	1.025	2.388	0.0360698
AHNAK	0.535	0.215	2.486	0.013	1.707	0.367	1.926	0.054	1.12	2.601	0.0118729
ATP1A1	0.424	0.216	1.969	0.049	1.528	0.329	1.604	0.109	1.002	2.332	0.0470885
SFN	0.426	0.213	1.997	0.046	1.531	0.327	1.626	0.104	1.008	2.325	0.0443807
HLA.E	-0.531	0.215	-2.468	0.014	0.588	0.127	-3.256	0.001	0.386	0.897	0.0125528
NPM1	0.433	0.213	2.031	0.042	1.542	0.329	1.649	0.099	1.015	2.341	0.0406516
FAM129B	0.492	0.215	2.292	0.022	1.635	0.351	1.81	0.07	1.074	2.49	0.0205593
COL4A2	0.576	0.216	2.663	0.008	1.779	0.385	2.024	0.043	1.164	2.719	0.00689471
CTSH	-0.581	0.217	-2.671	0.008	0.559	0.122	-3.623	0	0.365	0.857	0.00670993
TAPBP	-0.472	0.213	-2.209	0.027	0.624	0.133	-2.823	0.005	0.411	0.948	0.0258075
DSTN	0.456	0.214	2.126	0.033	1.577	0.338	1.708	0.088	1.036	2.401	0.0320463
PSCA	-0.424	0.215	-1.971	0.049	0.654	0.141	-2.455	0.014	0.429	0.998	0.046914
EIF4A2	-0.437	0.214	-2.046	0.041	0.646	0.138	-2.566	0.01	0.425	0.982	0.0391285
APOL1	-0.437	0.214	-2.039	0.041	0.646	0.139	-2.557	0.011	0.424	0.983	0.0398383
RRBP1	0.529	0.219	2.416	0.016	1.698	0.372	1.876	0.061	1.105	2.608	0.0145035
MDK	-0.546	0.215	-2.537	0.011	0.579	0.125	-3.376	0.001	0.38	0.883	0.0101946
S100A10	0.456	0.214	2.127	0.033	1.578	0.338	1.708	0.088	1.037	2.402	0.0317536
RPL17	0.635	0.214	2.965	0.003	1.887	0.404	2.195	0.028	1.24	2.871	0.00258292
ANXA1	0.932	0.223	4.172	0	2.539	0.567	2.714	0.007	1.639	3.933	1.56939e-05
EFHD2	-0.698	0.22	-3.181	0.001	0.497	0.109	-4.603	0	0.323	0.765	0.00117032
MARCKSL1	-0.456	0.216	-2.11	0.035	0.634	0.137	-2.673	0.008	0.415	0.968	0.0333226
FSCN1	0.601	0.216	2.784	0.005	1.825	0.394	2.092	0.036	1.195	2.787	0.00470658
PTMS	0.47	0.214	2.2	0.028	1.601	0.342	1.755	0.079	1.053	2.434	0.0264706
IQGAP1	0.637	0.218	2.922	0.003	1.89	0.412	2.161	0.031	1.233	2.897	0.0029771
TALDO1	0.51	0.217	2.348	0.019	1.665	0.361	1.84	0.066	1.088	2.548	0.0176321
ARHGDIB	-0.43	0.215	-2.004	0.045	0.65	0.14	-2.504	0.012	0.427	0.991	0.0435681
PSME1	-0.432	0.214	-2.024	0.043	0.649	0.139	-2.531	0.011	0.427	0.986	0.0414095
BTG2	-0.452	0.217	-2.086	0.037	0.636	0.138	-2.637	0.008	0.416	0.973	0.0351831
LRRC59	0.643	0.218	2.956	0.003	1.903	0.414	2.18	0.029	1.242	2.916	0.00263457
WDR6	-0.47	0.215	-2.19	0.029	0.625	0.134	-2.796	0.005	0.41	0.952	0.0269312
SRC	-0.662	0.217	-3.056	0.002	0.516	0.112	-4.333	0	0.337	0.789	0.00185717
BLCAP	-0.465	0.215	-2.159	0.031	0.628	0.135	-2.748	0.006	0.412	0.958	0.0293428
PLS3	0.582	0.217	2.681	0.007	1.789	0.388	2.033	0.042	1.169	2.737	0.00652847
CAPN2	0.487	0.216	2.255	0.024	1.627	0.351	1.785	0.074	1.066	2.484	0.0226703
PLOD1	0.44	0.216	2.043	0.041	1.553	0.335	1.653	0.098	1.018	2.37	0.0391114
ANXA5	0.502	0.217	2.319	0.02	1.652	0.358	1.823	0.068	1.081	2.526	0.0189648
RBBP4	-0.506	0.214	-2.363	0.018	0.603	0.129	-3.075	0.002	0.397	0.917	0.016985
ANP32B	0.444	0.214	2.079	0.038	1.559	0.333	1.678	0.093	1.026	2.37	0.0362503
CMTM6	-0.455	0.214	-2.121	0.034	0.634	0.136	-2.686	0.007	0.417	0.966	0.0323645
TRAF4	-0.462	0.214	-2.159	0.031	0.63	0.135	-2.745	0.006	0.414	0.958	0.0292021
KLF6	0.521	0.215	2.418	0.016	1.683	0.363	1.885	0.059	1.104	2.568	0.0144127
VCL	0.514	0.216	2.383	0.017	1.672	0.361	1.863	0.062	1.096	2.552	0.0159546
SUMF2	0.474	0.215	2.208	0.027	1.607	0.345	1.758	0.079	1.055	2.447	0.0258261
MCM3	-0.584	0.216	-2.704	0.007	0.557	0.12	-3.673	0	0.365	0.851	0.0060688
CALD1	0.445	0.215	2.071	0.038	1.561	0.335	1.672	0.095	1.024	2.378	0.0365883
MLLT6	-0.575	0.216	-2.655	0.008	0.563	0.122	-3.588	0	0.368	0.86	0.00712095
CCNL2	-0.469	0.215	-2.176	0.03	0.626	0.135	-2.776	0.006	0.41	0.955	0.0280237
WNK1	0.455	0.215	2.117	0.034	1.576	0.339	1.701	0.089	1.034	2.401	0.0326406
PSME2	-0.502	0.215	-2.329	0.02	0.605	0.13	-3.024	0.002	0.397	0.924	0.0185866
NME1	0.426	0.213	2.001	0.045	1.531	0.326	1.629	0.103	1.009	2.325	0.0439342
TBX3	-0.601	0.217	-2.774	0.006	0.548	0.119	-3.803	0	0.359	0.838	0.0048523
TMEM109	0.815	0.223	3.659	0	2.259	0.503	2.502	0.012	1.46	3.495	0.000170056
GARS	0.806	0.221	3.645	0	2.24	0.495	2.502	0.012	1.452	3.455	0.000181744
TRIM8	-0.49	0.215	-2.282	0.022	0.613	0.132	-2.945	0.003	0.402	0.933	0.0211518
PYGL	0.509	0.215	2.363	0.018	1.664	0.358	1.852	0.064	1.091	2.537	0.0168749
IPO7	0.593	0.217	2.738	0.006	1.809	0.392	2.065	0.039	1.183	2.765	0.00543857
IFNGR2	-0.483	0.215	-2.245	0.025	0.617	0.133	-2.886	0.004	0.404	0.941	0.0233233
COL5A2	0.446	0.217	2.056	0.04	1.562	0.339	1.659	0.097	1.021	2.389	0.0378738
MFSD10	-0.423	0.215	-1.97	0.049	0.655	0.141	-2.452	0.014	0.43	0.998	0.0471591
IARS2	0.639	0.216	2.961	0.003	1.895	0.409	2.188	0.029	1.241	2.892	0.00260662
IL4R	-0.486	0.214	-2.275	0.023	0.615	0.131	-2.93	0.003	0.404	0.935	0.0216241
TCIRG1	-0.611	0.216	-2.826	0.005	0.543	0.117	-3.896	0	0.355	0.829	0.00410956
TMEM219	-0.54	0.217	-2.491	0.013	0.583	0.126	-3.303	0.001	0.381	0.891	0.0115951
CKAP5	0.439	0.214	2.056	0.04	1.551	0.331	1.664	0.096	1.021	2.358	0.0380332
ACSL5	-0.508	0.215	-2.364	0.018	0.602	0.129	-3.08	0.002	0.395	0.917	0.0168749
HECTD1	0.463	0.215	2.157	0.031	1.589	0.341	1.726	0.084	1.043	2.421	0.0295966
PDCD6	-0.422	0.213	-1.979	0.048	0.656	0.14	-2.462	0.014	0.432	0.996	0.0462262
POLD2	0.531	0.214	2.481	0.013	1.7	0.364	1.925	0.054	1.118	2.585	0.0120486
ESYT2	0.542	0.215	2.526	0.012	1.72	0.369	1.949	0.051	1.129	2.62	0.0105563
IARS	0.538	0.215	2.498	0.012	1.713	0.369	1.932	0.053	1.123	2.613	0.0114116
SLC20A1	-0.638	0.219	-2.919	0.004	0.528	0.115	-4.085	0	0.344	0.811	0.00300337
ESRP2	-0.515	0.215	-2.39	0.017	0.598	0.129	-3.126	0.002	0.392	0.912	0.0155848
B4GALT5	0.433	0.217	1.996	0.046	1.542	0.334	1.62	0.105	1.008	2.359	0.0442728
MAN1B1	0.433	0.213	2.035	0.042	1.542	0.328	1.651	0.099	1.016	2.341	0.0403551
VWF	0.444	0.213	2.08	0.038	1.559	0.333	1.68	0.093	1.026	2.369	0.0358575
CYB5B	-0.562	0.216	-2.598	0.009	0.57	0.123	-3.487	0	0.373	0.871	0.00845883
THBS2	0.447	0.217	2.06	0.039	1.564	0.339	1.661	0.097	1.022	2.393	0.0376899
CYTH2	-0.479	0.214	-2.239	0.025	0.62	0.132	-2.872	0.004	0.408	0.942	0.0237943
IRF3	-0.437	0.214	-2.042	0.041	0.646	0.138	-2.56	0.01	0.425	0.983	0.0395563
ASS1	-0.462	0.216	-2.143	0.032	0.63	0.136	-2.724	0.006	0.413	0.961	0.030648
PSMB8	-0.568	0.216	-2.633	0.008	0.566	0.122	-3.545	0	0.371	0.865	0.00765119
PARP4	-0.461	0.215	-2.144	0.032	0.63	0.136	-2.725	0.006	0.413	0.961	0.0305445
POSTN	0.45	0.218	2.062	0.039	1.568	0.342	1.661	0.097	1.023	2.403	0.0373213
PCYOX1	0.472	0.215	2.197	0.028	1.603	0.344	1.752	0.08	1.052	2.441	0.0264343
CTSS	-0.482	0.213	-2.257	0.024	0.618	0.132	-2.9	0.004	0.407	0.939	0.0227055
GSDMD	-0.514	0.214	-2.407	0.016	0.598	0.128	-3.147	0.002	0.393	0.909	0.0149976
PHGDH	0.653	0.219	2.979	0.003	1.921	0.421	2.188	0.029	1.25	2.951	0.00244088
REPIN1	-0.523	0.213	-2.451	0.014	0.593	0.126	-3.22	0.001	0.39	0.901	0.013128
SRPK1	-0.445	0.214	-2.082	0.037	0.641	0.137	-2.622	0.009	0.421	0.974	0.0358488
OAS1	-0.631	0.217	-2.905	0.004	0.532	0.116	-4.048	0	0.348	0.815	0.00314053
PSMB10	-0.913	0.222	-4.107	0	0.401	0.089	-6.709	0	0.26	0.621	2.19142e-05
CNPY3	-0.465	0.214	-2.172	0.03	0.628	0.135	-2.766	0.006	0.413	0.956	0.028332
AMIGO2	-0.511	0.215	-2.378	0.017	0.6	0.129	-3.104	0.002	0.394	0.914	0.0161719
PRKCD	-0.438	0.214	-2.05	0.04	0.645	0.138	-2.573	0.01	0.424	0.981	0.038589
FCGRT	-0.43	0.213	-2.019	0.043	0.651	0.138	-2.522	0.012	0.429	0.988	0.0419125
EMP1	0.555	0.215	2.577	0.01	1.742	0.375	1.978	0.048	1.142	2.656	0.00900317
CARHSP1	-0.49	0.214	-2.288	0.022	0.613	0.131	-2.952	0.003	0.403	0.932	0.0207853
RBM10	-0.44	0.214	-2.062	0.039	0.644	0.138	-2.591	0.01	0.424	0.978	0.0375456
SVIL	0.585	0.217	2.695	0.007	1.795	0.39	2.04	0.041	1.173	2.748	0.00622337
RRM2	0.456	0.214	2.129	0.033	1.578	0.338	1.709	0.087	1.037	2.403	0.0316393
SIGMAR1	0.553	0.215	2.567	0.01	1.738	0.374	1.972	0.049	1.14	2.652	0.00934173
SPAG9	0.548	0.215	2.552	0.011	1.729	0.371	1.965	0.049	1.136	2.633	0.00975553
MTSS1L	-0.557	0.215	-2.59	0.01	0.573	0.123	-3.465	0.001	0.376	0.873	0.00868084
TIA1	-0.641	0.217	-2.956	0.003	0.527	0.114	-4.144	0	0.344	0.806	0.00264672
XPOT	0.543	0.215	2.524	0.012	1.721	0.37	1.948	0.051	1.129	2.622	0.0105367
OGFR	-0.445	0.214	-2.079	0.038	0.641	0.137	-2.619	0.009	0.421	0.975	0.0361492
PSENEN	-0.524	0.218	-2.406	0.016	0.592	0.129	-3.162	0.002	0.387	0.907	0.0148525
MBD6	-0.59	0.216	-2.728	0.006	0.554	0.12	-3.719	0	0.363	0.847	0.00562016
TSPAN15	-0.551	0.216	-2.545	0.011	0.576	0.125	-3.395	0.001	0.377	0.881	0.00993561
PRDX4	0.453	0.214	2.113	0.035	1.573	0.337	1.699	0.089	1.033	2.395	0.0329695
ARHGAP27	-0.519	0.215	-2.414	0.016	0.595	0.128	-3.164	0.002	0.391	0.907	0.0145859
BNIP3L	0.48	0.215	2.228	0.026	1.616	0.348	1.77	0.077	1.059	2.465	0.0245796
NIPBL	-0.482	0.214	-2.25	0.024	0.618	0.132	-2.89	0.004	0.406	0.94	0.0231958
TMEM132A	0.473	0.216	2.188	0.029	1.605	0.347	1.743	0.081	1.05	2.454	0.0270886
ACACA	0.618	0.216	2.857	0.004	1.855	0.401	2.131	0.033	1.214	2.835	0.00371618
APOL2	-0.612	0.217	-2.823	0.005	0.542	0.118	-3.893	0	0.355	0.829	0.00414468
PCGF3	-0.493	0.215	-2.298	0.022	0.611	0.131	-2.971	0.003	0.401	0.93	0.0202162
SPG7	-0.431	0.214	-2.009	0.045	0.65	0.139	-2.511	0.012	0.427	0.99	0.0427121
PPARD	-0.544	0.216	-2.513	0.012	0.581	0.126	-3.34	0.001	0.38	0.887	0.0109427
MOV10	-0.438	0.215	-2.036	0.042	0.645	0.139	-2.554	0.011	0.424	0.984	0.0401792
STAP2	-0.459	0.214	-2.139	0.032	0.632	0.136	-2.714	0.007	0.415	0.962	0.0307872
RNF128	-0.465	0.214	-2.172	0.03	0.628	0.135	-2.765	0.006	0.413	0.956	0.0283087
PTPN6	-0.659	0.218	-3.017	0.003	0.517	0.113	-4.271	0	0.337	0.794	0.0021316
CCNL1	-0.472	0.214	-2.202	0.028	0.624	0.134	-2.814	0.005	0.41	0.949	0.0261835
PEPD	-0.46	0.215	-2.135	0.033	0.631	0.136	-2.71	0.007	0.414	0.963	0.0311048
CAD	0.442	0.215	2.057	0.04	1.556	0.334	1.663	0.096	1.021	2.37	0.037827
CERCAM	0.654	0.22	2.975	0.003	1.922	0.422	2.184	0.029	1.25	2.957	0.00245329
MYC	0.539	0.216	2.49	0.013	1.714	0.371	1.925	0.054	1.122	2.62	0.0116532
NFAT5	-0.546	0.215	-2.534	0.011	0.579	0.125	-3.371	0.001	0.38	0.884	0.0102666
ESRRA	-0.537	0.219	-2.45	0.014	0.585	0.128	-3.243	0.001	0.381	0.898	0.013136
CDC42EP1	0.579	0.218	2.662	0.008	1.784	0.388	2.021	0.043	1.165	2.733	0.00693825
SSFA2	0.472	0.214	2.204	0.028	1.603	0.343	1.757	0.079	1.054	2.44	0.0259397
SPARCL1	0.478	0.214	2.235	0.025	1.613	0.345	1.777	0.076	1.061	2.454	0.0239872
IRF1	-0.457	0.213	-2.149	0.032	0.633	0.135	-2.724	0.006	0.417	0.961	0.0302377
PIK3C2B	-0.643	0.216	-2.978	0.003	0.526	0.114	-4.179	0	0.344	0.803	0.00244291
FAM89B	-0.513	0.216	-2.371	0.018	0.599	0.13	-3.097	0.002	0.392	0.915	0.0165565
DUSP3	0.436	0.213	2.046	0.041	1.547	0.33	1.658	0.097	1.019	2.35	0.0392912
GPRC5C	-0.451	0.214	-2.112	0.035	0.637	0.136	-2.669	0.008	0.419	0.968	0.0330658
CCNB1	0.57	0.217	2.633	0.008	1.769	0.383	2.007	0.045	1.157	2.704	0.00759409
FKBP10	0.432	0.215	2.006	0.045	1.54	0.332	1.629	0.103	1.01	2.349	0.0428844
USF1	-0.75	0.219	-3.417	0.001	0.472	0.104	-5.088	0	0.307	0.726	0.000470958
TRAFD1	-0.705	0.216	-3.267	0.001	0.494	0.107	-4.745	0	0.323	0.754	0.00086895
MRFAP1L1	-0.439	0.214	-2.052	0.04	0.645	0.138	-2.576	0.01	0.424	0.981	0.0385132
EFR3A	0.494	0.216	2.293	0.022	1.64	0.354	1.809	0.07	1.074	2.502	0.0204615
CYP51A1	0.599	0.217	2.759	0.006	1.821	0.395	2.076	0.038	1.19	2.787	0.00512267
ALOX5	-0.476	0.215	-2.213	0.027	0.621	0.134	-2.834	0.005	0.407	0.947	0.025425
ARHGAP5	0.442	0.214	2.07	0.038	1.556	0.332	1.673	0.094	1.024	2.365	0.0368031
MMP15	-0.651	0.218	-2.989	0.003	0.522	0.114	-4.212	0	0.34	0.799	0.00236153
NUP205	0.461	0.215	2.143	0.032	1.586	0.341	1.717	0.086	1.04	2.418	0.0305424
RETSAT	0.506	0.216	2.341	0.019	1.658	0.358	1.838	0.066	1.086	2.533	0.0179406
SH2B1	-0.499	0.215	-2.324	0.02	0.607	0.13	-3.014	0.003	0.399	0.925	0.0187436
RNF44	-0.501	0.215	-2.333	0.02	0.606	0.13	-3.029	0.002	0.398	0.923	0.01839
PNKD	-0.657	0.217	-3.025	0.002	0.519	0.113	-4.277	0	0.339	0.794	0.00208775
ZNF768	-0.576	0.216	-2.671	0.008	0.562	0.121	-3.611	0	0.369	0.858	0.00671609
SH3YL1	-0.448	0.213	-2.099	0.036	0.639	0.136	-2.647	0.008	0.421	0.971	0.0343168
PTPN18	-0.442	0.214	-2.069	0.039	0.642	0.137	-2.602	0.009	0.423	0.977	0.036934
NEK9	0.49	0.214	2.292	0.022	1.632	0.349	1.812	0.07	1.074	2.482	0.0205572
SCRN1	0.428	0.213	2.008	0.045	1.534	0.327	1.634	0.102	1.01	2.329	0.0430105
PRMT5	0.492	0.214	2.297	0.022	1.636	0.351	1.814	0.07	1.075	2.491	0.0202574
CARD11	-0.475	0.215	-2.209	0.027	0.622	0.134	-2.828	0.005	0.408	0.948	0.0258184
THOC3	0.487	0.214	2.273	0.023	1.627	0.348	1.799	0.072	1.069	2.475	0.0217531
SH3BP2	-0.491	0.214	-2.294	0.022	0.612	0.131	-2.962	0.003	0.403	0.931	0.0204877
TNFRSF14	-0.619	0.217	-2.854	0.004	0.538	0.117	-3.952	0	0.352	0.824	0.00371862
LTBP2	0.458	0.215	2.131	0.033	1.582	0.34	1.709	0.087	1.037	2.411	0.0314497
MTHFD2	0.511	0.215	2.375	0.018	1.667	0.359	1.859	0.063	1.093	2.543	0.0162428
PPP2CB	0.471	0.214	2.194	0.028	1.601	0.343	1.75	0.08	1.051	2.437	0.0267345
ZDHHC9	0.454	0.214	2.123	0.034	1.574	0.336	1.707	0.088	1.035	2.393	0.0321191
IFRD2	0.61	0.214	2.849	0.004	1.84	0.394	2.133	0.033	1.21	2.799	0.00383636
GNPDA1	-0.447	0.215	-2.076	0.038	0.64	0.138	-2.617	0.009	0.42	0.975	0.0362953
EIF4EBP1	0.448	0.215	2.085	0.037	1.565	0.336	1.681	0.093	1.027	2.384	0.0354049
MAPK8IP3	-0.496	0.214	-2.319	0.02	0.609	0.13	-3.003	0.003	0.4	0.926	0.0191174
PATZ1	-0.48	0.215	-2.236	0.025	0.619	0.133	-2.87	0.004	0.406	0.942	0.0238633
SLC7A1	0.463	0.215	2.157	0.031	1.589	0.341	1.726	0.084	1.043	2.42	0.0294004
ERAP1	-0.611	0.215	-2.845	0.004	0.543	0.117	-3.922	0	0.356	0.827	0.00388254
UBA7	-0.637	0.218	-2.928	0.003	0.529	0.115	-4.095	0	0.345	0.81	0.00288663
PILRB	-0.424	0.214	-1.986	0.047	0.654	0.14	-2.474	0.013	0.43	0.994	0.0452544
BHLHE41	-0.539	0.216	-2.499	0.012	0.583	0.126	-3.311	0.001	0.382	0.89	0.0113869
PCGF2	0.436	0.214	2.041	0.041	1.546	0.33	1.654	0.098	1.017	2.35	0.0396505
ARSD	-0.471	0.215	-2.196	0.028	0.624	0.134	-2.805	0.005	0.41	0.951	0.0265791
CDK10	-0.697	0.218	-3.195	0.001	0.498	0.109	-4.619	0	0.325	0.764	0.00111402
PIAS3	0.474	0.215	2.208	0.027	1.606	0.345	1.758	0.079	1.055	2.446	0.0258394
PCMTD2	-0.437	0.213	-2.049	0.04	0.646	0.138	-2.569	0.01	0.425	0.981	0.0387628
PPFIBP2	-0.499	0.215	-2.319	0.02	0.607	0.131	-3.007	0.003	0.398	0.926	0.0190274
CAPN5	-0.475	0.217	-2.194	0.028	0.622	0.135	-2.809	0.005	0.407	0.951	0.0266036
LDLR	0.492	0.214	2.292	0.022	1.635	0.351	1.811	0.07	1.074	2.489	0.0206463
ANLN	0.516	0.216	2.394	0.017	1.675	0.361	1.87	0.061	1.098	2.556	0.0154244
SPTLC2	0.422	0.214	1.976	0.048	1.525	0.326	1.612	0.107	1.004	2.318	0.0464723
C1RL	-0.466	0.214	-2.179	0.029	0.628	0.134	-2.776	0.006	0.413	0.954	0.0280364
CAV2	0.433	0.213	2.032	0.042	1.542	0.329	1.649	0.099	1.015	2.343	0.0404541
PLEKHA6	-0.592	0.215	-2.747	0.006	0.553	0.119	-3.746	0	0.363	0.844	0.00528269
PVR	0.477	0.214	2.225	0.026	1.611	0.346	1.77	0.077	1.059	2.453	0.0245545
PIK3IP1	-0.538	0.215	-2.504	0.012	0.584	0.125	-3.317	0.001	0.383	0.89	0.0112125
DENND2D	-0.521	0.215	-2.423	0.015	0.594	0.128	-3.18	0.001	0.389	0.905	0.0141893
HMGCR	0.455	0.214	2.122	0.034	1.576	0.338	1.705	0.088	1.035	2.4	0.0323656
KCTD3	0.497	0.214	2.324	0.02	1.644	0.352	1.831	0.067	1.081	2.5	0.0188936
CDC42SE2	-0.503	0.215	-2.342	0.019	0.605	0.13	-3.043	0.002	0.397	0.921	0.0179513
PARP12	-0.438	0.214	-2.049	0.04	0.645	0.138	-2.571	0.01	0.425	0.981	0.0390993
SLC31A1	0.427	0.215	1.987	0.047	1.533	0.329	1.617	0.106	1.006	2.336	0.0454064
PHIP	-0.498	0.215	-2.317	0.021	0.608	0.131	-3.002	0.003	0.399	0.926	0.0192463
TAF1C	-0.692	0.219	-3.159	0.002	0.501	0.11	-4.554	0	0.326	0.769	0.00127395
BRD9	-0.425	0.216	-1.971	0.049	0.654	0.141	-2.456	0.014	0.428	0.998	0.047088
EPN2	0.692	0.218	3.177	0.001	1.998	0.435	2.293	0.022	1.304	3.063	0.00120484
UBE2V2	0.611	0.217	2.816	0.005	1.843	0.4	2.107	0.035	1.204	2.821	0.00422631
EPHB6	-0.656	0.217	-3.025	0.002	0.519	0.113	-4.275	0	0.339	0.794	0.00208014
ARL4C	0.5	0.215	2.32	0.02	1.648	0.355	1.826	0.068	1.081	2.514	0.018956
CES2	-0.454	0.214	-2.118	0.034	0.635	0.136	-2.681	0.007	0.417	0.967	0.0326007
NDUFS1	0.456	0.214	2.13	0.033	1.578	0.338	1.71	0.087	1.037	2.4	0.031643
HMGN3	-0.423	0.214	-1.972	0.049	0.655	0.14	-2.455	0.014	0.43	0.997	0.0467142
XPC	-0.553	0.215	-2.576	0.01	0.575	0.124	-3.44	0.001	0.377	0.876	0.00914421
REXO2	0.499	0.214	2.329	0.02	1.647	0.353	1.834	0.067	1.082	2.505	0.0185702
FAM84B	-0.526	0.215	-2.451	0.014	0.591	0.127	-3.225	0.001	0.388	0.9	0.0132201
THOP1	0.556	0.214	2.591	0.01	1.743	0.374	1.988	0.047	1.145	2.654	0.00874219
GBA2	-0.474	0.214	-2.208	0.027	0.623	0.134	-2.824	0.005	0.409	0.948	0.025676
EFNB2	0.487	0.214	2.276	0.023	1.627	0.348	1.802	0.072	1.07	2.475	0.0215041
URB1	0.447	0.216	2.064	0.039	1.563	0.338	1.665	0.096	1.023	2.389	0.0371879
SPTBN2	0.474	0.215	2.206	0.027	1.606	0.345	1.757	0.079	1.054	2.447	0.0259285
PFKM	0.567	0.215	2.633	0.008	1.762	0.379	2.01	0.044	1.156	2.687	0.00759868
ELMO3	-0.432	0.216	-1.998	0.046	0.649	0.14	-2.499	0.012	0.425	0.992	0.0439444
FAM111A	-0.483	0.215	-2.249	0.025	0.617	0.132	-2.89	0.004	0.405	0.94	0.02312
P4HA2	0.459	0.215	2.129	0.033	1.582	0.341	1.708	0.088	1.037	2.413	0.0315243
BTN3A2	-0.502	0.213	-2.353	0.019	0.605	0.129	-3.055	0.002	0.399	0.92	0.0175362
EXTL3	0.444	0.213	2.08	0.038	1.558	0.332	1.679	0.093	1.026	2.367	0.0359245
USP31	-0.522	0.214	-2.439	0.015	0.593	0.127	-3.203	0.001	0.39	0.903	0.0136113
HLTF	-0.468	0.215	-2.181	0.029	0.626	0.134	-2.782	0.005	0.411	0.954	0.0277568
ENDOD1	0.546	0.216	2.53	0.011	1.727	0.373	1.949	0.051	1.131	2.637	0.0104389
PNKP	-0.433	0.214	-2.028	0.043	0.649	0.139	-2.538	0.011	0.427	0.986	0.0408433
CASP4	-0.438	0.214	-2.049	0.04	0.645	0.138	-2.571	0.01	0.425	0.981	0.0388482
SLC7A8	0.566	0.215	2.635	0.008	1.76	0.378	2.013	0.044	1.156	2.681	0.0075877
ERC1	0.512	0.216	2.372	0.018	1.668	0.36	1.857	0.063	1.093	2.545	0.0164461
DEGS1	0.531	0.219	2.421	0.015	1.7	0.373	1.879	0.06	1.106	2.612	0.0142199
GBP3	-0.468	0.214	-2.191	0.028	0.626	0.134	-2.794	0.005	0.412	0.952	0.0271672
INO80E	-0.475	0.215	-2.205	0.027	0.622	0.134	-2.822	0.005	0.408	0.949	0.0259462
SLC23A2	-0.463	0.215	-2.151	0.031	0.629	0.136	-2.736	0.006	0.412	0.96	0.0298024
B3GNT5	0.421	0.214	1.965	0.049	1.523	0.326	1.604	0.109	1.001	2.317	0.0478365
CACNB3	-0.425	0.214	-1.988	0.047	0.654	0.14	-2.477	0.013	0.43	0.994	0.0452254
SULT1A3	-0.54	0.217	-2.494	0.013	0.583	0.126	-3.308	0.001	0.381	0.891	0.0115381
CAMSAP1	0.48	0.215	2.239	0.025	1.617	0.347	1.778	0.075	1.062	2.462	0.0237063
ZNF33A	-0.434	0.213	-2.04	0.041	0.648	0.138	-2.555	0.011	0.427	0.983	0.0397206
SLC25A28	-0.437	0.216	-2.025	0.043	0.646	0.139	-2.54	0.011	0.423	0.986	0.0411794
TRIM14	-0.479	0.215	-2.224	0.026	0.619	0.133	-2.853	0.004	0.406	0.945	0.0248459
NFYA	-0.562	0.216	-2.608	0.009	0.57	0.123	-3.5	0	0.374	0.87	0.00822065
HPS3	-0.434	0.213	-2.041	0.041	0.648	0.138	-2.556	0.011	0.427	0.983	0.039647
SH3D19	0.458	0.214	2.14	0.032	1.581	0.338	1.717	0.086	1.039	2.404	0.0309182
ZNRF1	-0.424	0.214	-1.979	0.048	0.654	0.14	-2.466	0.014	0.43	0.996	0.0460091
APOL4	-0.505	0.215	-2.351	0.019	0.603	0.13	-3.059	0.002	0.396	0.919	0.0175276
C1QTNF6	0.425	0.215	1.983	0.047	1.53	0.328	1.615	0.106	1.005	2.33	0.045758
UNC119	-0.429	0.214	-2.002	0.045	0.651	0.14	-2.5	0.012	0.428	0.991	0.0437257
PRKCH	0.643	0.217	2.964	0.003	1.903	0.413	2.186	0.029	1.244	2.911	0.00258362
NTN4	-0.454	0.214	-2.121	0.034	0.635	0.136	-2.684	0.007	0.418	0.966	0.0324212
FADS1	0.48	0.214	2.242	0.025	1.616	0.346	1.78	0.075	1.062	2.459	0.0237389
TEX2	0.649	0.216	2.999	0.003	1.913	0.414	2.206	0.027	1.252	2.924	0.0022896
ADAM17	0.426	0.217	1.969	0.049	1.532	0.332	1.603	0.109	1.002	2.342	0.0469251
STAT5A	-0.46	0.213	-2.161	0.031	0.631	0.134	-2.744	0.006	0.416	0.958	0.0292776
TUBB2A	0.436	0.214	2.043	0.041	1.547	0.331	1.655	0.098	1.018	2.352	0.0393288
CNOT6L	-0.501	0.214	-2.339	0.019	0.606	0.13	-3.036	0.002	0.398	0.922	0.01817
GBP4	-0.462	0.213	-2.173	0.03	0.63	0.134	-2.763	0.006	0.415	0.956	0.0284646
ANKRD12	-0.487	0.217	-2.239	0.025	0.615	0.134	-2.884	0.004	0.401	0.941	0.0238657
GAS2L1	0.467	0.215	2.175	0.03	1.595	0.342	1.738	0.082	1.047	2.429	0.0280615
GMIP	-0.432	0.214	-2.014	0.044	0.649	0.139	-2.519	0.012	0.427	0.988	0.0423951
ITPRIP	0.456	0.214	2.132	0.033	1.578	0.338	1.712	0.087	1.038	2.4	0.0312946
CUL9	-0.437	0.216	-2.029	0.042	0.646	0.139	-2.545	0.011	0.423	0.985	0.0408119
SEMA4D	-0.598	0.217	-2.751	0.006	0.55	0.12	-3.765	0	0.359	0.842	0.00526807
C19orf66	-0.621	0.217	-2.863	0.004	0.538	0.117	-3.967	0	0.351	0.822	0.00363683
DNMBP	-0.525	0.216	-2.435	0.015	0.591	0.128	-3.203	0.001	0.388	0.903	0.0137127
NFE2L3	-0.58	0.215	-2.695	0.007	0.56	0.12	-3.652	0	0.367	0.854	0.00630039
PSMD5	0.456	0.214	2.126	0.034	1.578	0.338	1.707	0.088	1.036	2.402	0.0320053
C3orf58	0.488	0.216	2.264	0.024	1.629	0.351	1.791	0.073	1.068	2.486	0.0222874
DCBLD2	0.441	0.214	2.056	0.04	1.554	0.333	1.663	0.096	1.021	2.366	0.0380285
MYLIP	-0.497	0.214	-2.325	0.02	0.608	0.13	-3.011	0.003	0.4	0.925	0.0187173
DHRS4	0.559	0.215	2.601	0.009	1.749	0.376	1.993	0.046	1.148	2.665	0.00844866
PHKG2	-0.478	0.213	-2.243	0.025	0.62	0.132	-2.876	0.004	0.408	0.941	0.0234086
CCPG1	0.472	0.214	2.204	0.028	1.602	0.343	1.757	0.079	1.054	2.437	0.0259872
CROCC	-0.424	0.214	-1.986	0.047	0.654	0.14	-2.473	0.013	0.43	0.995	0.0454495
EHBP1	0.931	0.224	4.146	0	2.537	0.569	2.698	0.007	1.634	3.939	1.72862e-05
TIMM8B	0.435	0.214	2.037	0.042	1.545	0.33	1.652	0.099	1.017	2.349	0.0402879
LRRC42	0.493	0.216	2.283	0.022	1.637	0.353	1.802	0.072	1.072	2.499	0.020977
RAB4B	-0.914	0.225	-4.068	0	0.401	0.09	-6.651	0	0.258	0.623	2.58346e-05
MPI	0.565	0.214	2.645	0.008	1.76	0.376	2.021	0.043	1.158	2.676	0.00740177
PLA2G2F	-0.503	0.215	-2.342	0.019	0.605	0.13	-3.043	0.002	0.397	0.921	0.0178979
TTLL3	-0.52	0.215	-2.418	0.016	0.594	0.128	-3.172	0.002	0.39	0.906	0.0144055
CCNT2	-0.458	0.214	-2.145	0.032	0.632	0.135	-2.721	0.007	0.416	0.961	0.0303876
SIGIRR	-0.589	0.217	-2.715	0.007	0.555	0.12	-3.698	0	0.363	0.849	0.0058719
RPP21	-0.487	0.216	-2.26	0.024	0.614	0.132	-2.913	0.004	0.403	0.937	0.0223355
CDK18	-0.46	0.214	-2.143	0.032	0.631	0.135	-2.721	0.007	0.415	0.961	0.030494
MDM4	-0.585	0.217	-2.696	0.007	0.557	0.121	-3.663	0	0.364	0.853	0.00625648
ARRDC2	-0.576	0.216	-2.668	0.008	0.562	0.121	-3.607	0	0.368	0.858	0.00683374
TRIM38	-0.66	0.217	-3.046	0.002	0.517	0.112	-4.314	0	0.338	0.79	0.00192262
ID2	-0.438	0.213	-2.056	0.04	0.645	0.138	-2.58	0.01	0.425	0.98	0.0380056
ZNF76	-0.496	0.216	-2.301	0.021	0.609	0.131	-2.978	0.003	0.399	0.929	0.019997
ACOT13	-0.425	0.215	-1.978	0.048	0.654	0.14	-2.464	0.014	0.429	0.996	0.046254
DARS2	0.575	0.216	2.669	0.008	1.778	0.383	2.029	0.042	1.165	2.713	0.00680743
BTN3A1	-0.801	0.219	-3.665	0	0.449	0.098	-5.617	0	0.292	0.689	0.000171077
RAD1	-0.429	0.214	-2.008	0.045	0.651	0.139	-2.509	0.012	0.428	0.99	0.0431345
EGFR	0.657	0.217	3.031	0.002	1.93	0.419	2.221	0.026	1.261	2.952	0.00202855
ZNF513	-0.571	0.216	-2.648	0.008	0.565	0.122	-3.572	0	0.37	0.862	0.00724828
LIG3	0.429	0.214	2.005	0.045	1.535	0.328	1.631	0.103	1.01	2.335	0.0431105
FCHSD1	-0.448	0.214	-2.096	0.036	0.639	0.137	-2.645	0.008	0.42	0.971	0.0344763
NEBL	0.425	0.215	1.977	0.048	1.529	0.329	1.611	0.107	1.004	2.33	0.0465053
SUFU	-0.458	0.214	-2.143	0.032	0.632	0.135	-2.718	0.007	0.416	0.962	0.0304979
SIDT2	0.604	0.215	2.814	0.005	1.83	0.393	2.112	0.035	1.201	2.788	0.00430179
PEX16	-0.495	0.217	-2.285	0.022	0.609	0.132	-2.958	0.003	0.398	0.932	0.0208916
ZNF276	-0.473	0.215	-2.195	0.028	0.623	0.134	-2.806	0.005	0.409	0.951	0.026684
UTP14C	0.461	0.217	2.129	0.033	1.586	0.344	1.705	0.088	1.037	2.426	0.031706
USP25	0.507	0.214	2.367	0.018	1.661	0.356	1.856	0.063	1.091	2.528	0.0167236
LY75	-0.443	0.213	-2.078	0.038	0.642	0.137	-2.614	0.009	0.423	0.975	0.0361329
C19orf25	-0.436	0.215	-2.026	0.043	0.646	0.139	-2.54	0.011	0.424	0.986	0.0409292
CHKA	-0.556	0.214	-2.592	0.01	0.574	0.123	-3.466	0.001	0.377	0.873	0.00867164
CHMP4C	-0.5	0.214	-2.337	0.019	0.607	0.13	-3.031	0.002	0.399	0.923	0.0182329
RAB20	-0.503	0.215	-2.344	0.019	0.605	0.13	-3.046	0.002	0.397	0.921	0.0178584
TMEM104	0.783	0.221	3.54	0	2.187	0.483	2.455	0.014	1.418	3.373	0.000283666
TRIB3	0.65	0.218	2.985	0.003	1.915	0.417	2.195	0.028	1.25	2.935	0.00239433
RASAL2	0.453	0.214	2.116	0.034	1.572	0.336	1.702	0.089	1.034	2.391	0.0326346
DRAM1	-0.558	0.216	-2.585	0.01	0.572	0.124	-3.461	0.001	0.375	0.874	0.00882932
SPOPL	-0.495	0.215	-2.302	0.021	0.609	0.131	-2.979	0.003	0.4	0.929	0.0200776
MTHFD1L	0.445	0.214	2.082	0.037	1.561	0.334	1.68	0.093	1.026	2.373	0.0355724
AIMP2	0.503	0.214	2.348	0.019	1.653	0.354	1.845	0.065	1.087	2.515	0.0176488
MFSD2A	-0.634	0.217	-2.928	0.003	0.53	0.115	-4.089	0	0.347	0.811	0.00290838
SUCLA2	0.511	0.215	2.373	0.018	1.667	0.359	1.858	0.063	1.093	2.542	0.0164276
ATP2A3	-0.464	0.215	-2.155	0.031	0.629	0.135	-2.743	0.006	0.412	0.959	0.0296243
MCF2L	-0.736	0.219	-3.356	0.001	0.479	0.105	-4.96	0	0.311	0.736	0.000599212
TRANK1	-0.699	0.216	-3.232	0.001	0.497	0.108	-4.677	0	0.325	0.76	0.000983088
ZNRD1	-0.52	0.215	-2.411	0.016	0.595	0.128	-3.162	0.002	0.39	0.907	0.01466
AKNA	-0.48	0.213	-2.252	0.024	0.619	0.132	-2.89	0.004	0.408	0.94	0.0229595
ALDH1A3	0.451	0.213	2.114	0.035	1.57	0.335	1.701	0.089	1.033	2.384	0.0330731
HOXB7	-0.426	0.216	-1.969	0.049	0.653	0.141	-2.455	0.014	0.427	0.998	0.0470857
ZNF33B	-0.424	0.214	-1.985	0.047	0.654	0.14	-2.473	0.013	0.43	0.995	0.0452721
INPP1	-0.434	0.215	-2.02	0.043	0.648	0.139	-2.529	0.011	0.425	0.987	0.0418239
APOBEC3G	-0.527	0.214	-2.466	0.014	0.59	0.126	-3.247	0.001	0.388	0.897	0.012608
TAPBPL	-0.679	0.216	-3.144	0.002	0.507	0.11	-4.5	0	0.332	0.774	0.00135845
NFKBIE	-0.626	0.216	-2.905	0.004	0.534	0.115	-4.039	0	0.35	0.816	0.00316351
SBF2	0.526	0.215	2.446	0.014	1.692	0.364	1.902	0.057	1.11	2.579	0.0133363
CEP192	-0.439	0.213	-2.059	0.04	0.645	0.137	-2.585	0.01	0.425	0.979	0.0379156
PLEKHF1	-0.633	0.216	-2.935	0.003	0.531	0.115	-4.095	0	0.348	0.81	0.00284538
RCOR3	-0.57	0.217	-2.625	0.009	0.566	0.123	-3.537	0	0.37	0.866	0.00777256
STRN3	0.564	0.215	2.622	0.009	1.757	0.378	2.004	0.045	1.153	2.678	0.00784633
EPPK1	-0.458	0.213	-2.148	0.032	0.632	0.135	-2.725	0.006	0.416	0.961	0.0303376
SFXN4	-0.475	0.215	-2.206	0.027	0.622	0.134	-2.824	0.005	0.408	0.948	0.0257839
TCF4	0.485	0.215	2.26	0.024	1.624	0.348	1.791	0.073	1.066	2.473	0.0223783
POLB	-0.652	0.215	-3.036	0.002	0.521	0.112	-4.281	0	0.342	0.794	0.00202807
POLA2	0.499	0.215	2.327	0.02	1.647	0.353	1.832	0.067	1.082	2.508	0.0186983
ZNF518A	-0.467	0.213	-2.188	0.029	0.627	0.134	-2.789	0.005	0.413	0.952	0.0272327
C19orf12	-0.482	0.214	-2.252	0.024	0.617	0.132	-2.894	0.004	0.406	0.939	0.0230487
TCF7L2	-0.423	0.213	-1.984	0.047	0.655	0.14	-2.469	0.014	0.432	0.995	0.0456091
ATG2B	0.421	0.214	1.969	0.049	1.523	0.325	1.608	0.108	1.002	2.315	0.0473848
DOCK8	-0.501	0.216	-2.326	0.02	0.606	0.131	-3.019	0.003	0.397	0.924	0.0187349
GATA2	-0.81	0.219	-3.701	0	0.445	0.097	-5.703	0	0.289	0.683	0.000146017
ZNF260	-0.454	0.213	-2.128	0.033	0.635	0.135	-2.693	0.007	0.418	0.965	0.0318076
NIPSNAP3A	0.482	0.213	2.257	0.024	1.619	0.346	1.791	0.073	1.065	2.46	0.0227628
FUK	-0.431	0.215	-1.999	0.046	0.65	0.14	-2.499	0.012	0.426	0.992	0.0437832
TRPT1	-0.492	0.218	-2.259	0.024	0.612	0.133	-2.918	0.004	0.399	0.937	0.0223937
FANCL	-0.46	0.214	-2.152	0.031	0.631	0.135	-2.732	0.006	0.415	0.96	0.0298264
RAD9A	-0.429	0.214	-2	0.045	0.651	0.14	-2.498	0.013	0.428	0.991	0.0436465
GPR160	-0.5	0.214	-2.335	0.02	0.607	0.13	-3.03	0.002	0.399	0.923	0.0181922
SOCS6	0.523	0.215	2.426	0.015	1.687	0.363	1.89	0.059	1.106	2.573	0.0141286
LFNG	-0.44	0.215	-2.041	0.041	0.644	0.139	-2.563	0.01	0.422	0.983	0.0397459
CD40	-0.478	0.215	-2.227	0.026	0.62	0.133	-2.856	0.004	0.407	0.944	0.024525
KDELR3	0.631	0.219	2.877	0.004	1.88	0.412	2.133	0.033	1.223	2.89	0.00344179
LRRC32	0.428	0.215	1.988	0.047	1.534	0.33	1.617	0.106	1.006	2.339	0.0450472
B3GALNT1	-0.432	0.214	-2.022	0.043	0.649	0.139	-2.529	0.011	0.427	0.987	0.0414558
ZHX3	0.658	0.218	3.018	0.003	1.931	0.421	2.211	0.027	1.259	2.96	0.00212617
FAM114A1	0.709	0.219	3.235	0.001	2.031	0.445	2.318	0.02	1.322	3.12	0.000952489
UCHL5	0.73	0.219	3.33	0.001	2.075	0.455	2.363	0.018	1.35	3.188	0.000661629
PRMT6	0.494	0.216	2.293	0.022	1.64	0.354	1.809	0.07	1.074	2.502	0.0205972
HEXDC	-0.505	0.215	-2.344	0.019	0.604	0.13	-3.049	0.002	0.396	0.921	0.017843
BATF	-0.431	0.215	-2.01	0.044	0.65	0.139	-2.513	0.012	0.427	0.989	0.0425508
OPN3	0.444	0.213	2.081	0.037	1.559	0.333	1.68	0.093	1.026	2.368	0.0358558
TGFB1I1	0.585	0.218	2.684	0.007	1.796	0.392	2.032	0.042	1.171	2.753	0.00645442
NLE1	0.68	0.216	3.149	0.002	1.973	0.426	2.285	0.022	1.293	3.012	0.00133067
MEGF6	-0.528	0.214	-2.462	0.014	0.59	0.126	-3.243	0.001	0.387	0.898	0.0127578
PIN4	-0.445	0.213	-2.085	0.037	0.641	0.137	-2.626	0.009	0.422	0.974	0.0355727
IFT122	0.527	0.217	2.434	0.015	1.694	0.367	1.892	0.059	1.108	2.591	0.0137692
GXYLT1	-0.525	0.214	-2.455	0.014	0.592	0.126	-3.228	0.001	0.389	0.9	0.0130118
HERC3	0.524	0.214	2.446	0.014	1.69	0.362	1.904	0.057	1.11	2.572	0.0133632
CHCHD5	-0.453	0.215	-2.107	0.035	0.636	0.137	-2.666	0.008	0.417	0.969	0.0334918
ACSF3	-0.474	0.214	-2.214	0.027	0.622	0.133	-2.833	0.005	0.409	0.947	0.0383418
SAMD12	-0.471	0.215	-2.193	0.028	0.624	0.134	-2.801	0.005	0.41	0.951	0.0269193
RGMB	0.468	0.214	2.189	0.029	1.597	0.342	1.748	0.081	1.05	2.429	0.0272289
KLHDC4	-0.566	0.218	-2.6	0.009	0.568	0.124	-3.496	0	0.371	0.87	0.0084497
CCDC107	-0.471	0.215	-2.186	0.029	0.624	0.135	-2.792	0.005	0.409	0.953	0.0272946
PDGFRA	0.433	0.215	2.014	0.044	1.541	0.331	1.635	0.102	1.012	2.348	0.0421876
EFEMP1	0.465	0.216	2.156	0.031	1.592	0.343	1.724	0.085	1.043	2.428	0.0294758
KCTD9	0.659	0.217	3.039	0.002	1.932	0.419	2.226	0.026	1.263	2.954	0.00196678
ZNF524	-0.48	0.214	-2.241	0.025	0.618	0.133	-2.877	0.004	0.406	0.942	0.0236184
PPT2	0.46	0.213	2.166	0.03	1.585	0.337	1.735	0.083	1.045	2.404	0.0289602
GNA11	0.511	0.215	2.377	0.017	1.667	0.358	1.861	0.063	1.094	2.541	0.0162322
OSBPL10	0.551	0.217	2.543	0.011	1.735	0.376	1.956	0.051	1.135	2.652	0.00998107
CCNYL1	0.495	0.216	2.288	0.022	1.641	0.355	1.805	0.071	1.074	2.507	0.0206857
NLRP1	-0.484	0.216	-2.244	0.025	0.616	0.133	-2.886	0.004	0.404	0.941	0.0235665
MBOAT2	0.565	0.215	2.629	0.009	1.76	0.378	2.008	0.045	1.155	2.682	0.00770883
PQLC3	0.493	0.214	2.307	0.021	1.637	0.35	1.821	0.069	1.077	2.487	0.0197765
POLR3D	0.491	0.215	2.278	0.023	1.634	0.352	1.8	0.072	1.071	2.492	0.0212352
HEATR5A	0.499	0.215	2.315	0.021	1.646	0.355	1.823	0.068	1.079	2.511	0.0192875
GEN1	-0.455	0.213	-2.134	0.033	0.635	0.135	-2.701	0.007	0.418	0.964	0.0315491
ALPK1	-0.828	0.221	-3.75	0	0.437	0.096	-5.836	0	0.283	0.674	0.000115144
DTNBP1	-0.604	0.217	-2.79	0.005	0.546	0.118	-3.832	0	0.357	0.835	0.00463393
CERK	0.428	0.213	2.008	0.045	1.534	0.327	1.634	0.102	1.01	2.328	0.0428336
MLF1	0.432	0.213	2.025	0.043	1.54	0.328	1.645	0.1	1.014	2.339	0.0412317
BTN3A3	-0.455	0.213	-2.139	0.032	0.634	0.135	-2.709	0.007	0.418	0.963	0.0311778
DCLRE1C	-0.548	0.215	-2.542	0.011	0.578	0.125	-3.385	0.001	0.379	0.882	0.0100475
GCA	-0.581	0.214	-2.716	0.007	0.559	0.12	-3.683	0	0.368	0.851	0.00592188
HMMR	0.474	0.215	2.201	0.028	1.606	0.346	1.753	0.08	1.053	2.45	0.0262519
MTHFR	-0.465	0.217	-2.145	0.032	0.628	0.136	-2.731	0.006	0.411	0.961	0.030381
SNX29	0.495	0.214	2.307	0.021	1.64	0.352	1.82	0.069	1.077	2.496	0.0197453
SETMAR	-0.571	0.216	-2.638	0.008	0.565	0.122	-3.558	0	0.37	0.863	0.00744893
ZNF600	-0.463	0.213	-2.171	0.03	0.629	0.134	-2.761	0.006	0.414	0.956	0.0284769
POC1A	0.557	0.216	2.575	0.01	1.746	0.378	1.974	0.048	1.142	2.669	0.00912764
DEPDC5	-0.827	0.22	-3.766	0	0.437	0.096	-5.86	0	0.284	0.672	0.000108176
ZNF195	-0.681	0.218	-3.125	0.002	0.506	0.11	-4.478	0	0.33	0.776	0.00145155
KCNK6	0.491	0.216	2.269	0.023	1.634	0.354	1.793	0.073	1.069	2.498	0.0218124
PPP2R3B	-0.653	0.22	-2.973	0.003	0.52	0.114	-4.196	0	0.338	0.8	0.00248294
CDH11	0.498	0.217	2.294	0.022	1.646	0.357	1.807	0.071	1.075	2.519	0.0204063
GCH1	-0.723	0.218	-3.311	0.001	0.485	0.106	-4.857	0	0.316	0.745	0.000718289
TRIM62	-0.491	0.215	-2.282	0.023	0.612	0.132	-2.947	0.003	0.401	0.933	0.0211367
MAP1B	0.438	0.214	2.047	0.041	1.55	0.332	1.658	0.097	1.019	2.357	0.0387846
KDM5D	-0.429	0.215	-2.001	0.045	0.651	0.14	-2.499	0.012	0.427	0.991	0.0436598
AOC3	0.549	0.216	2.54	0.011	1.732	0.375	1.954	0.051	1.134	2.646	0.0101126
MTHFSD	-0.467	0.213	-2.189	0.029	0.627	0.134	-2.79	0.005	0.413	0.952	0.0271058
ADAM12	0.487	0.218	2.233	0.026	1.628	0.355	1.768	0.077	1.061	2.497	0.0239103
SCNN1G	-0.439	0.213	-2.057	0.04	0.645	0.138	-2.583	0.01	0.424	0.979	0.0378827
ZNF302	-0.42	0.213	-1.972	0.049	0.657	0.14	-2.451	0.014	0.433	0.997	0.046825
OSBPL7	-0.533	0.215	-2.473	0.013	0.587	0.126	-3.265	0.001	0.385	0.895	0.0123764
COL14A1	0.47	0.215	2.181	0.029	1.6	0.345	1.74	0.082	1.049	2.44	0.0276387
OXCT1	0.646	0.216	2.991	0.003	1.908	0.412	2.203	0.028	1.249	2.913	0.00234064
NRARP	0.429	0.213	2.012	0.044	1.535	0.327	1.636	0.102	1.011	2.331	0.0426293
MIPEP	0.462	0.215	2.153	0.031	1.587	0.34	1.724	0.085	1.042	2.416	0.0297675
ELMOD3	-0.537	0.215	-2.498	0.012	0.585	0.126	-3.307	0.001	0.384	0.891	0.0114926
SGMS2	0.531	0.216	2.455	0.014	1.701	0.368	1.905	0.057	1.113	2.598	0.0130034
SARM1	-0.585	0.217	-2.689	0.007	0.557	0.121	-3.654	0	0.364	0.853	0.00637153
LEPROT	0.478	0.215	2.224	0.026	1.613	0.347	1.768	0.077	1.059	2.459	0.0246479
ZNF862	-0.457	0.214	-2.137	0.033	0.633	0.135	-2.709	0.007	0.417	0.963	0.0310654
G2E3	0.58	0.217	2.673	0.008	1.786	0.387	2.028	0.043	1.167	2.732	0.00671188
TPST1	0.781	0.221	3.533	0	2.183	0.482	2.453	0.014	1.416	3.365	0.00028993
CNN1	0.471	0.216	2.177	0.029	1.602	0.347	1.736	0.083	1.048	2.449	0.0279698
SPOCK2	-0.6	0.217	-2.769	0.006	0.549	0.119	-3.794	0	0.359	0.839	0.00495607
ZNF43	-0.52	0.214	-2.424	0.015	0.595	0.128	-3.179	0.001	0.391	0.905	0.0141792
KLHL36	-0.5	0.214	-2.342	0.019	0.606	0.13	-3.039	0.002	0.399	0.922	0.0179504
ZNF226	-0.605	0.215	-2.812	0.005	0.546	0.117	-3.864	0	0.358	0.832	0.00428369
CLIC3	0.46	0.215	2.138	0.033	1.585	0.341	1.713	0.087	1.039	2.417	0.0311254
FHOD3	-0.474	0.213	-2.223	0.026	0.622	0.133	-2.845	0.004	0.41	0.945	0.0250543
FAM126A	0.453	0.215	2.107	0.035	1.572	0.338	1.695	0.09	1.032	2.395	0.033321
PDLIM2	0.511	0.216	2.368	0.018	1.666	0.359	1.854	0.064	1.092	2.543	0.0165944
PEX26	0.425	0.214	1.988	0.047	1.53	0.327	1.619	0.105	1.006	2.328	0.044883
DUSP14	0.531	0.216	2.452	0.014	1.7	0.368	1.903	0.057	1.112	2.598	0.0130135
ZNF91	-0.527	0.215	-2.448	0.014	0.591	0.127	-3.222	0.001	0.387	0.9	0.0132547
FKTN	0.574	0.215	2.676	0.007	1.776	0.381	2.036	0.042	1.166	2.705	0.00669246
PRMT3	0.756	0.217	3.477	0.001	2.129	0.463	2.44	0.015	1.391	3.26	0.000374293
SLC2A6	-0.47	0.215	-2.183	0.029	0.625	0.135	-2.787	0.005	0.41	0.953	0.0275633
KCTD13	-0.535	0.214	-2.499	0.012	0.586	0.125	-3.305	0.001	0.385	0.891	0.011422
CD109	0.527	0.216	2.442	0.015	1.694	0.366	1.898	0.058	1.11	2.586	0.0134267
CASD1	-0.551	0.215	-2.559	0.01	0.576	0.124	-3.414	0.001	0.378	0.879	0.00958154
ZNF446	-0.463	0.213	-2.167	0.03	0.63	0.134	-2.756	0.006	0.414	0.957	0.0287032
TBKBP1	-0.443	0.215	-2.064	0.039	0.642	0.138	-2.597	0.009	0.421	0.978	0.037458
SBNO1	0.445	0.214	2.077	0.038	1.561	0.335	1.676	0.094	1.025	2.377	0.0362374
WDR4	0.766	0.219	3.494	0	2.151	0.472	2.441	0.015	1.4	3.306	0.000343198
KRT14	0.419	0.213	1.968	0.049	1.521	0.324	1.607	0.108	1.002	2.31	0.0473785
TMC7	-0.472	0.216	-2.181	0.029	0.624	0.135	-2.787	0.005	0.408	0.953	0.0276771
ZNF700	-0.475	0.216	-2.199	0.028	0.622	0.134	-2.815	0.005	0.407	0.95	0.0264214
TRAF5	-0.484	0.214	-2.261	0.024	0.616	0.132	-2.908	0.004	0.405	0.938	0.022454
DUSP2	-0.483	0.216	-2.24	0.025	0.617	0.133	-2.88	0.004	0.404	0.941	0.0236184
IDUA	-0.453	0.217	-2.092	0.036	0.636	0.138	-2.647	0.008	0.416	0.972	0.0347563
TCFL5	0.559	0.215	2.597	0.009	1.749	0.377	1.99	0.047	1.147	2.668	0.00849158
IL17RE	0.429	0.215	1.993	0.046	1.536	0.331	1.621	0.105	1.007	2.342	0.0445768
HEATR3	0.522	0.217	2.405	0.016	1.685	0.366	1.874	0.061	1.101	2.578	0.014938
MAP3K8	-0.457	0.213	-2.145	0.032	0.633	0.135	-2.72	0.007	0.417	0.961	0.0304369
UHRF1BP1L	0.565	0.216	2.619	0.009	1.76	0.38	2.001	0.045	1.153	2.686	0.00795962
MLKL	-0.538	0.214	-2.509	0.012	0.584	0.125	-3.322	0.001	0.384	0.889	0.0112046
LYSMD3	0.475	0.215	2.213	0.027	1.607	0.345	1.762	0.078	1.056	2.448	0.0254838
PASK	-0.45	0.215	-2.095	0.036	0.638	0.137	-2.646	0.008	0.419	0.971	0.0346127
RNF166	-0.426	0.213	-1.995	0.046	0.653	0.139	-2.487	0.013	0.43	0.993	0.0444616
FAM76B	-0.48	0.214	-2.244	0.025	0.619	0.132	-2.88	0.004	0.407	0.941	0.0234962
NFIC	0.453	0.214	2.113	0.035	1.572	0.337	1.699	0.089	1.033	2.393	0.0329702
CSAD	-0.632	0.218	-2.905	0.004	0.531	0.116	-4.052	0	0.347	0.814	0.00312823
TGFB3	0.452	0.215	2.1	0.036	1.571	0.338	1.69	0.091	1.031	2.395	0.0340232
STMN3	0.468	0.214	2.186	0.029	1.597	0.342	1.746	0.081	1.05	2.43	0.0273232
SLC25A15	0.505	0.216	2.334	0.02	1.657	0.359	1.832	0.067	1.084	2.533	0.0182372
HLA.DOA	-0.461	0.213	-2.17	0.03	0.63	0.134	-2.757	0.006	0.416	0.956	0.028586
RNFT1	0.467	0.218	2.143	0.032	1.596	0.348	1.712	0.087	1.041	2.447	0.0306589
ALG1L	-0.452	0.214	-2.113	0.035	0.637	0.136	-2.671	0.008	0.419	0.968	0.0328995
GABBR1	-0.468	0.213	-2.193	0.028	0.626	0.134	-2.796	0.005	0.412	0.952	0.0270863
PPP2R3A	0.61	0.218	2.793	0.005	1.84	0.402	2.091	0.037	1.2	2.823	0.0045583
KCTD21	-0.474	0.217	-2.188	0.029	0.622	0.135	-2.8	0.005	0.407	0.952	0.0272422
CDK3	-0.508	0.215	-2.364	0.018	0.602	0.129	-3.08	0.002	0.395	0.917	0.0167968
RAB43	-0.561	0.214	-2.624	0.009	0.571	0.122	-3.519	0	0.375	0.868	0.00788215
UNKL	-0.457	0.215	-2.13	0.033	0.633	0.136	-2.699	0.007	0.416	0.964	0.0317145
PTGER4	-0.705	0.219	-3.217	0.001	0.494	0.108	-4.673	0	0.321	0.759	0.00102204
GPHN	0.55	0.214	2.567	0.01	1.733	0.371	1.974	0.048	1.139	2.637	0.00938692
CLK4	-0.453	0.215	-2.111	0.035	0.636	0.136	-2.671	0.008	0.417	0.968	0.0329758
ARHGAP26	-0.468	0.215	-2.177	0.029	0.626	0.135	-2.776	0.006	0.411	0.954	0.0281593
CXCL12	0.424	0.214	1.975	0.048	1.527	0.328	1.61	0.107	1.003	2.325	0.0464594
ZRSR2	-0.458	0.216	-2.117	0.034	0.632	0.137	-2.686	0.007	0.414	0.967	0.0326452
ZNF814	-0.463	0.215	-2.157	0.031	0.629	0.135	-2.744	0.006	0.413	0.958	0.0293674
ETV7	-0.849	0.22	-3.862	0	0.428	0.094	-6.084	0	0.278	0.658	7.03964e-05
NLN	0.422	0.214	1.973	0.049	1.525	0.326	1.61	0.107	1.003	2.319	0.0464934
METTL4	-0.453	0.214	-2.117	0.034	0.636	0.136	-2.678	0.007	0.418	0.967	0.0327606
TSEN2	-0.483	0.215	-2.246	0.025	0.617	0.133	-2.888	0.004	0.405	0.94	0.0232416
GMFG	-0.548	0.219	-2.502	0.012	0.578	0.127	-3.332	0.001	0.376	0.888	0.0112614
ZNF248	-0.42	0.213	-1.97	0.049	0.657	0.14	-2.449	0.014	0.432	0.998	0.0472266
HSH2D	-0.49	0.215	-2.281	0.023	0.613	0.132	-2.944	0.003	0.402	0.933	0.0211419
GTF3C4	0.555	0.216	2.573	0.01	1.743	0.376	1.974	0.048	1.141	2.66	0.00912044
DPP8	0.439	0.215	2.047	0.041	1.552	0.333	1.656	0.098	1.019	2.363	0.0390178
C1orf226	-0.452	0.214	-2.109	0.035	0.636	0.136	-2.667	0.008	0.418	0.968	0.0334593
ZNF529	-0.599	0.215	-2.792	0.005	0.549	0.118	-3.823	0	0.361	0.837	0.00460554
FA2H	-0.575	0.215	-2.675	0.007	0.563	0.121	-3.614	0	0.369	0.858	0.00667952
MTMR9	0.457	0.214	2.138	0.033	1.579	0.337	1.716	0.086	1.039	2.4	0.0309925
ARSB	0.432	0.216	1.997	0.046	1.54	0.333	1.621	0.105	1.008	2.353	0.0439188
SPOCD1	-0.485	0.216	-2.24	0.025	0.616	0.133	-2.883	0.004	0.403	0.941	0.0236368
BTN2A2	-0.423	0.212	-1.993	0.046	0.655	0.139	-2.482	0.013	0.432	0.993	0.0446325
KCNK5	-0.577	0.215	-2.682	0.007	0.562	0.121	-3.628	0	0.369	0.856	0.00655389
FLNC	0.429	0.214	2.002	0.045	1.536	0.329	1.628	0.104	1.009	2.338	0.0435146
ZNF44	-0.562	0.215	-2.615	0.009	0.57	0.123	-3.51	0	0.374	0.869	0.00803165
SPAG4	-0.505	0.217	-2.33	0.02	0.604	0.131	-3.032	0.002	0.395	0.923	0.0183894
AHI1	-0.444	0.215	-2.066	0.039	0.642	0.138	-2.6	0.009	0.421	0.978	0.0372859
EIF3C	0.494	0.215	2.292	0.022	1.639	0.353	1.809	0.07	1.074	2.499	0.020558
SLC45A3	-0.446	0.214	-2.082	0.037	0.64	0.137	-2.624	0.009	0.421	0.974	0.0357916
ANKRD39	-0.436	0.213	-2.043	0.041	0.647	0.138	-2.561	0.01	0.426	0.982	0.0395691
LYPD6	-0.548	0.214	-2.559	0.011	0.578	0.124	-3.407	0.001	0.38	0.88	0.00956811
AGAP1	0.486	0.215	2.261	0.024	1.626	0.35	1.79	0.073	1.067	2.479	0.0224419
HEYL	0.526	0.217	2.427	0.015	1.691	0.366	1.888	0.059	1.106	2.585	0.0140302
PROS1	0.425	0.213	1.994	0.046	1.53	0.326	1.624	0.104	1.007	2.324	0.0443603
TBC1D8B	0.494	0.215	2.299	0.021	1.639	0.352	1.814	0.07	1.076	2.497	0.0201202
C12orf45	-0.436	0.216	-2.018	0.044	0.647	0.14	-2.529	0.011	0.424	0.988	0.0419616
ZNF614	-0.42	0.213	-1.975	0.048	0.657	0.14	-2.454	0.014	0.433	0.997	0.0464833
ZDHHC23	-0.562	0.216	-2.606	0.009	0.57	0.123	-3.498	0	0.373	0.87	0.00827226
CCNJL	-0.514	0.217	-2.369	0.018	0.598	0.13	-3.097	0.002	0.391	0.915	0.0166059
TMEM229B	-0.569	0.216	-2.639	0.008	0.566	0.122	-3.555	0	0.371	0.864	0.00750566
ZNF784	-0.505	0.215	-2.347	0.019	0.604	0.13	-3.052	0.002	0.396	0.92	0.0176293
ZNF48	-0.459	0.215	-2.136	0.033	0.632	0.136	-2.71	0.007	0.415	0.963	0.0311589
CYP4F12	-0.425	0.214	-1.992	0.046	0.654	0.14	-2.482	0.013	0.43	0.993	0.0445438
CPEB2	0.501	0.215	2.334	0.02	1.65	0.354	1.836	0.066	1.084	2.513	0.0183878
L2HGDH	0.496	0.214	2.316	0.021	1.642	0.351	1.826	0.068	1.079	2.497	0.0193459
CXorf56	0.433	0.214	2.024	0.043	1.542	0.33	1.643	0.1	1.014	2.345	0.0413067
GTF2H3	0.441	0.214	2.058	0.04	1.554	0.333	1.664	0.096	1.021	2.364	0.0379633
RILP	-0.617	0.219	-2.816	0.005	0.54	0.118	-3.894	0	0.351	0.829	0.00422793
CEP135	-0.434	0.214	-2.031	0.042	0.648	0.138	-2.543	0.011	0.426	0.985	0.0406964
HOMER1	0.635	0.217	2.925	0.003	1.887	0.41	2.166	0.03	1.233	2.888	0.0029422
C4orf33	-0.482	0.215	-2.246	0.025	0.618	0.133	-2.885	0.004	0.406	0.941	0.0232348
S1PR1	0.421	0.212	1.985	0.047	1.524	0.324	1.619	0.105	1.005	2.311	0.0455354
PLAGL1	0.528	0.218	2.419	0.016	1.695	0.37	1.879	0.06	1.105	2.6	0.0144177
C12orf75	0.531	0.215	2.468	0.014	1.7	0.366	1.915	0.055	1.115	2.591	0.0124865
GRK5	0.42	0.214	1.966	0.049	1.522	0.325	1.605	0.108	1.001	2.313	0.0473813
MAGI3	0.537	0.215	2.496	0.013	1.711	0.368	1.931	0.053	1.122	2.608	0.0115511
SLC25A30	0.443	0.216	2.053	0.04	1.558	0.336	1.658	0.097	1.02	2.378	0.0383708
ATF7IP2	-0.568	0.215	-2.644	0.008	0.567	0.122	-3.56	0	0.372	0.863	0.00732562
FAM105A	-0.566	0.215	-2.634	0.008	0.568	0.122	-3.542	0	0.373	0.865	0.00761959
LAMA2	0.502	0.217	2.314	0.021	1.652	0.358	1.819	0.069	1.08	2.526	0.0192257
PTPRG	0.421	0.213	1.974	0.048	1.523	0.325	1.612	0.107	1.003	2.313	0.0464119
SSBP2	0.487	0.213	2.281	0.023	1.627	0.347	1.806	0.071	1.071	2.471	0.0212481
ZNF808	-0.501	0.214	-2.339	0.019	0.606	0.13	-3.036	0.002	0.398	0.922	0.0180652
KLHL29	-0.634	0.217	-2.927	0.003	0.53	0.115	-4.087	0	0.347	0.811	0.00292815
GPR39	-0.526	0.217	-2.427	0.015	0.591	0.128	-3.194	0.001	0.386	0.904	0.014134
USP35	-0.446	0.213	-2.091	0.037	0.64	0.137	-2.635	0.008	0.421	0.972	0.0351566
U2AF1L4	-0.465	0.215	-2.169	0.03	0.628	0.135	-2.761	0.006	0.412	0.956	0.0286343
PRELP	0.469	0.215	2.181	0.029	1.599	0.344	1.741	0.082	1.049	2.438	0.0277266
DZIP1	0.445	0.216	2.057	0.04	1.561	0.338	1.66	0.097	1.021	2.386	0.0379815
ZNF182	-0.468	0.214	-2.186	0.029	0.626	0.134	-2.788	0.005	0.411	0.953	0.0274139
N4BP2L1	-0.525	0.215	-2.45	0.014	0.591	0.127	-3.222	0.001	0.388	0.9	0.0131999
FKBP14	0.712	0.221	3.226	0.001	2.038	0.45	2.308	0.021	1.322	3.141	0.000981412
GSTCD	0.472	0.215	2.199	0.028	1.603	0.344	1.753	0.08	1.053	2.441	0.0263577
ST7L	0.427	0.214	1.999	0.046	1.533	0.328	1.627	0.104	1.008	2.331	0.0440656
FAM171B	0.484	0.216	2.239	0.025	1.623	0.351	1.775	0.076	1.062	2.479	0.0237269
TPPP3	0.764	0.22	3.47	0.001	2.147	0.473	2.426	0.015	1.395	3.306	0.000380848
ZFP14	-0.454	0.213	-2.128	0.033	0.635	0.135	-2.693	0.007	0.418	0.965	0.0317041
KCNAB2	-0.432	0.213	-2.026	0.043	0.649	0.138	-2.534	0.011	0.427	0.986	0.04141
HEY1	0.521	0.215	2.427	0.015	1.684	0.362	1.891	0.059	1.105	2.565	0.0141153
PGBD2	-0.501	0.213	-2.346	0.019	0.606	0.129	-3.045	0.002	0.399	0.921	0.0177512
MAP1A	0.483	0.216	2.234	0.025	1.621	0.35	1.772	0.076	1.061	2.476	0.0239337
HCN3	-0.431	0.213	-2.02	0.043	0.65	0.139	-2.524	0.012	0.428	0.987	0.0416353
CD36	0.548	0.214	2.559	0.01	1.729	0.37	1.971	0.049	1.137	2.63	0.00958492
GK	-0.443	0.214	-2.066	0.039	0.642	0.138	-2.598	0.009	0.422	0.978	0.0373206
HOXB4	-0.433	0.215	-2.011	0.044	0.648	0.14	-2.518	0.012	0.425	0.989	0.0424461
CCDC28B	0.473	0.215	2.196	0.028	1.604	0.345	1.75	0.08	1.052	2.446	0.0266128
PHLPP2	-0.433	0.213	-2.031	0.042	0.648	0.138	-2.542	0.011	0.427	0.985	0.0408976
TMLHE	0.469	0.213	2.199	0.028	1.599	0.341	1.755	0.079	1.052	2.429	0.0265163
FGR	-0.553	0.214	-2.587	0.01	0.575	0.123	-3.454	0.001	0.378	0.875	0.00884294
ITGB7	-0.439	0.214	-2.055	0.04	0.644	0.138	-2.58	0.01	0.424	0.98	0.0381582
METRN	0.421	0.213	1.982	0.047	1.524	0.324	1.618	0.106	1.005	2.312	0.0458605
KIF21B	-0.664	0.219	-3.031	0.002	0.515	0.113	-4.301	0	0.335	0.791	0.00204805
CD96	-0.655	0.218	-3.007	0.003	0.519	0.113	-4.247	0	0.339	0.796	0.00220676
IL2RB	-0.419	0.213	-1.964	0.049	0.658	0.14	-2.44	0.015	0.433	0.999	0.048052
EGFL6	-0.52	0.214	-2.433	0.015	0.595	0.127	-3.191	0.001	0.391	0.904	0.0139669
CRYAB	0.436	0.215	2.026	0.043	1.546	0.332	1.643	0.1	1.014	2.356	0.0410046
ARHGAP25	-0.512	0.216	-2.376	0.018	0.599	0.129	-3.103	0.002	0.392	0.914	0.0163994
CYP1B1	0.579	0.216	2.684	0.007	1.785	0.385	2.037	0.042	1.169	2.724	0.00651655
CLDN15	-0.451	0.214	-2.105	0.035	0.637	0.137	-2.66	0.008	0.418	0.969	0.0337033
ZNF136	-0.517	0.216	-2.395	0.017	0.596	0.129	-3.136	0.002	0.391	0.91	0.0154173
TRPV1	-0.55	0.215	-2.562	0.01	0.577	0.124	-3.415	0.001	0.379	0.879	0.00946781
ZFY	-0.436	0.214	-2.039	0.041	0.647	0.138	-2.555	0.011	0.425	0.983	0.039873
ZNF296	-0.457	0.214	-2.136	0.033	0.633	0.136	-2.708	0.007	0.416	0.963	0.0310885
GPRASP2	0.575	0.215	2.675	0.007	1.777	0.382	2.034	0.042	1.166	2.708	0.00671688
DFFB	-0.463	0.215	-2.159	0.031	0.629	0.135	-2.746	0.006	0.413	0.958	0.0294736
XDH	-0.447	0.215	-2.084	0.037	0.639	0.137	-2.629	0.009	0.42	0.974	0.0356514
ZSCAN16	-0.494	0.214	-2.31	0.021	0.61	0.131	-2.988	0.003	0.401	0.928	0.0195282
ZNF708	-0.521	0.214	-2.434	0.015	0.594	0.127	-3.195	0.001	0.39	0.903	0.013845
GPR4	0.472	0.214	2.21	0.027	1.604	0.343	1.762	0.078	1.055	2.438	0.0256058
MAP7D3	0.629	0.217	2.899	0.004	1.876	0.407	2.152	0.031	1.226	2.87	0.00318281
FAR2	-0.468	0.215	-2.179	0.029	0.626	0.134	-2.779	0.005	0.411	0.954	0.0279136
CAP2	0.439	0.213	2.057	0.04	1.551	0.331	1.665	0.096	1.021	2.357	0.0379931
RSPH3	0.436	0.214	2.037	0.042	1.546	0.331	1.652	0.099	1.017	2.351	0.0403137
ZNF175	-0.474	0.215	-2.201	0.028	0.622	0.134	-2.817	0.005	0.408	0.949	0.0262074
SMPDL3B	-0.446	0.213	-2.091	0.037	0.64	0.137	-2.635	0.008	0.421	0.972	0.0352124
MAPK12	0.498	0.215	2.319	0.02	1.645	0.353	1.826	0.068	1.08	2.506	0.0190568
AGAP6	-0.463	0.214	-2.164	0.03	0.629	0.135	-2.753	0.006	0.414	0.957	0.0288316
ZNF793	-0.438	0.213	-2.057	0.04	0.645	0.137	-2.581	0.01	0.425	0.98	0.0380851
CD3E	-0.426	0.213	-2.006	0.045	0.653	0.139	-2.501	0.012	0.43	0.99	0.0433842
STAMBPL1	-0.476	0.214	-2.225	0.026	0.621	0.133	-2.85	0.004	0.408	0.945	0.0248672
LCAT	-0.522	0.215	-2.429	0.015	0.593	0.127	-3.19	0.001	0.389	0.904	0.0139874
EFNA3	0.597	0.215	2.775	0.006	1.817	0.391	2.09	0.037	1.192	2.769	0.00488069
ZNF577	-0.656	0.216	-3.041	0.002	0.519	0.112	-4.299	0	0.34	0.792	0.00196403
LAT	-0.467	0.214	-2.184	0.029	0.627	0.134	-2.784	0.005	0.412	0.953	0.0275571
UCHL1	0.493	0.216	2.282	0.022	1.637	0.353	1.802	0.072	1.072	2.498	0.0210275
TRPS1	0.453	0.214	2.119	0.034	1.574	0.337	1.703	0.089	1.035	2.394	0.0324513
ZNF493	-0.465	0.214	-2.173	0.03	0.628	0.134	-2.766	0.006	0.413	0.955	0.0282947
RAB3IL1	0.425	0.216	1.972	0.049	1.53	0.33	1.606	0.108	1.003	2.334	0.0466434
C17orf51	0.469	0.214	2.195	0.028	1.599	0.342	1.752	0.08	1.052	2.43	0.0266712
PCDH18	0.449	0.213	2.107	0.035	1.567	0.334	1.697	0.09	1.032	2.379	0.033368
FBN2	0.443	0.214	2.071	0.038	1.558	0.333	1.673	0.094	1.024	2.369	0.0368099
SMAD6	-0.55	0.215	-2.551	0.011	0.577	0.124	-3.401	0.001	0.378	0.88	0.00973743
TREM2	0.431	0.215	2.002	0.045	1.539	0.331	1.626	0.104	1.009	2.347	0.0433758
PINX1	0.529	0.215	2.463	0.014	1.697	0.364	1.913	0.056	1.114	2.584	0.0126854
GAMT	0.429	0.213	2.017	0.044	1.536	0.327	1.64	0.101	1.012	2.33	0.0421786
HOMER2	0.425	0.215	1.977	0.048	1.53	0.329	1.61	0.107	1.004	2.332	0.0463549
HSPB6	0.599	0.217	2.756	0.006	1.82	0.395	2.073	0.038	1.189	2.785	0.00517107
EPDR1	0.425	0.214	1.989	0.047	1.53	0.327	1.62	0.105	1.006	2.326	0.0449683
ALG10	0.566	0.217	2.612	0.009	1.762	0.382	1.994	0.046	1.152	2.695	0.00814477
PDZRN3	0.445	0.214	2.077	0.038	1.561	0.335	1.676	0.094	1.025	2.377	0.0362413
SKAP1	-0.515	0.216	-2.388	0.017	0.597	0.129	-3.124	0.002	0.391	0.912	0.0157764
ENPEP	0.527	0.215	2.451	0.014	1.695	0.365	1.905	0.057	1.112	2.583	0.0131148
LCK	-0.53	0.214	-2.473	0.013	0.588	0.126	-3.261	0.001	0.386	0.896	0.012368
DACT1	0.444	0.216	2.055	0.04	1.559	0.337	1.659	0.097	1.021	2.382	0.0380364
TMEM37	-0.437	0.214	-2.04	0.041	0.646	0.138	-2.559	0.01	0.424	0.983	0.0395559
CD2	-0.433	0.213	-2.035	0.042	0.649	0.138	-2.547	0.011	0.428	0.984	0.0403469
ARSK	0.492	0.214	2.299	0.021	1.636	0.35	1.816	0.069	1.075	2.489	0.0201909
KLHL3	-0.457	0.215	-2.121	0.034	0.633	0.136	-2.689	0.007	0.415	0.966	0.0322415
CD7	-0.521	0.213	-2.44	0.015	0.594	0.127	-3.201	0.001	0.391	0.903	0.013678
LCA5	0.456	0.214	2.137	0.033	1.578	0.337	1.715	0.086	1.038	2.399	0.0310676
MAP2K6	0.666	0.217	3.075	0.002	1.947	0.422	2.244	0.025	1.273	2.977	0.00173965
AKAP7	-0.486	0.215	-2.265	0.024	0.615	0.132	-2.917	0.004	0.404	0.937	0.0222075
SPHAR	-0.428	0.215	-1.991	0.047	0.652	0.14	-2.485	0.013	0.427	0.993	0.0447157
PRR11	0.491	0.216	2.275	0.023	1.633	0.352	1.798	0.072	1.07	2.493	0.0214847
HYAL3	0.797	0.218	3.652	0	2.22	0.485	2.517	0.012	1.447	3.405	0.000178326
EGR3	0.455	0.214	2.129	0.033	1.576	0.337	1.71	0.087	1.037	2.397	0.0315769
PRTFDC1	0.519	0.215	2.412	0.016	1.681	0.362	1.881	0.06	1.102	2.563	0.0147045
RAB6B	0.568	0.216	2.635	0.008	1.765	0.38	2.01	0.044	1.157	2.692	0.00757778
PCLO	0.464	0.214	2.17	0.03	1.591	0.34	1.736	0.083	1.046	2.42	0.0285835
TAF4B	0.582	0.216	2.699	0.007	1.79	0.386	2.046	0.041	1.173	2.731	0.00617307
TMEM163	-0.507	0.215	-2.361	0.018	0.602	0.129	-3.075	0.002	0.395	0.917	0.0170322
SEPT1	-0.459	0.214	-2.147	0.032	0.632	0.135	-2.725	0.006	0.415	0.961	0.0303543
SPATA18	0.512	0.214	2.392	0.017	1.669	0.357	1.872	0.061	1.097	2.539	0.0156584
OGFRL1	0.454	0.214	2.123	0.034	1.575	0.337	1.706	0.088	1.035	2.394	0.0322287
HOXB5	-0.498	0.217	-2.298	0.022	0.608	0.132	-2.978	0.003	0.398	0.929	0.0201706
DAGLA	0.465	0.213	2.181	0.029	1.593	0.34	1.744	0.081	1.048	2.42	0.027763
LIPT1	-0.643	0.216	-2.97	0.003	0.526	0.114	-4.168	0	0.344	0.804	0.00251375
SLC41A2	-0.515	0.213	-2.42	0.016	0.597	0.127	-3.166	0.002	0.394	0.907	0.0144696
HSPA4L	0.538	0.216	2.486	0.013	1.713	0.371	1.923	0.055	1.121	2.619	0.0118509
ALDH1L2	0.699	0.22	3.182	0.001	2.011	0.442	2.289	0.022	1.308	3.094	0.00116302
STXBP4	0.513	0.216	2.382	0.017	1.671	0.36	1.863	0.062	1.095	2.549	0.0160682
BEND5	-0.77	0.22	-3.502	0	0.463	0.102	-5.274	0	0.301	0.713	0.000334217
AGER	-0.692	0.218	-3.181	0.001	0.5	0.109	-4.587	0	0.327	0.767	0.00118571
SERPINA3	0.491	0.214	2.292	0.022	1.633	0.35	1.812	0.07	1.074	2.485	0.0205226
PTPRR	-0.506	0.215	-2.352	0.019	0.603	0.13	-3.062	0.002	0.395	0.919	0.0174026
ZNF345	-0.443	0.214	-2.074	0.038	0.642	0.137	-2.61	0.009	0.422	0.976	0.0364412
DNAH1	-0.486	0.215	-2.268	0.023	0.615	0.132	-2.921	0.003	0.404	0.936	0.0219828
MUC4	0.615	0.218	2.82	0.005	1.851	0.404	2.106	0.035	1.206	2.838	0.00417829
GULP1	0.459	0.215	2.137	0.033	1.582	0.34	1.714	0.087	1.039	2.41	0.0309241
PPP2R2B	-0.465	0.216	-2.15	0.032	0.628	0.136	-2.738	0.006	0.411	0.96	0.0299627
FUT10	0.592	0.216	2.74	0.006	1.807	0.39	2.068	0.039	1.184	2.76	0.00543125
NTN1	0.458	0.216	2.118	0.034	1.58	0.341	1.7	0.089	1.035	2.414	0.0324234
KCNE4	0.424	0.215	1.974	0.048	1.529	0.329	1.609	0.108	1.003	2.33	0.0465096
SFT2D2	0.543	0.218	2.493	0.013	1.721	0.375	1.924	0.054	1.123	2.637	0.0115564
CCRL2	-0.591	0.219	-2.698	0.007	0.554	0.121	-3.678	0	0.361	0.851	0.00616635
STAC3	-0.464	0.213	-2.174	0.03	0.629	0.134	-2.767	0.006	0.414	0.955	0.0283125
TEK	0.484	0.213	2.267	0.023	1.622	0.346	1.797	0.072	1.068	2.464	0.0220108
PRELID2	-0.44	0.215	-2.044	0.041	0.644	0.139	-2.568	0.01	0.422	0.982	0.0392761
DOK7	-0.608	0.216	-2.815	0.005	0.544	0.118	-3.875	0	0.356	0.831	0.004275
FLRT2	0.604	0.217	2.781	0.005	1.829	0.397	2.088	0.037	1.195	2.799	0.00473029
KIAA1328	0.51	0.216	2.363	0.018	1.666	0.359	1.851	0.064	1.091	2.543	0.0169142
ZMAT3	0.528	0.214	2.464	0.014	1.695	0.363	1.914	0.056	1.114	2.58	0.012682
C20orf196	-0.736	0.219	-3.36	0.001	0.479	0.105	-4.967	0	0.312	0.736	0.0005942
SAMD8	0.54	0.216	2.499	0.012	1.716	0.371	1.931	0.053	1.123	2.62	0.0114191
DSEL	0.587	0.215	2.726	0.006	1.799	0.387	2.062	0.039	1.179	2.743	0.00569716
ADAMTS13	-0.533	0.216	-2.472	0.013	0.587	0.127	-3.265	0.001	0.385	0.896	0.0123048
ZNF565	-0.478	0.213	-2.244	0.025	0.62	0.132	-2.877	0.004	0.408	0.941	0.023434
OLFML1	0.506	0.216	2.345	0.019	1.659	0.358	1.84	0.066	1.087	2.533	0.0177081
PCDHB10	0.675	0.218	3.095	0.002	1.963	0.428	2.251	0.024	1.281	3.01	0.0016139
RHOJ	0.433	0.213	2.03	0.042	1.542	0.329	1.648	0.099	1.015	2.342	0.0406354
CCDC134	0.646	0.218	2.959	0.003	1.907	0.416	2.18	0.029	1.244	2.925	0.00261224
ZNF709	-0.721	0.219	-3.295	0.001	0.486	0.106	-4.828	0	0.317	0.747	0.00076447
ASCL2	-0.552	0.219	-2.52	0.012	0.576	0.126	-3.363	0.001	0.375	0.885	0.0106472
XG	0.714	0.219	3.258	0.001	2.042	0.447	2.329	0.02	1.329	3.137	0.000884192
NTF4	-0.438	0.215	-2.042	0.041	0.645	0.138	-2.562	0.01	0.424	0.983	0.0396815
SLC13A3	-0.461	0.214	-2.158	0.031	0.63	0.135	-2.743	0.006	0.415	0.958	0.0293625
SPRR1B	0.515	0.215	2.391	0.017	1.674	0.36	1.869	0.062	1.097	2.552	0.0156564
TPK1	-0.442	0.215	-2.052	0.04	0.643	0.138	-2.581	0.01	0.421	0.98	0.0385021
CD3D	-0.501	0.214	-2.345	0.019	0.606	0.129	-3.044	0.002	0.399	0.921	0.0178233
LPL	0.558	0.215	2.595	0.009	1.747	0.376	1.989	0.047	1.146	2.663	0.00851733
ENTPD2	0.446	0.214	2.078	0.038	1.562	0.335	1.677	0.094	1.026	2.378	0.036077
FGFBP1	0.434	0.214	2.026	0.043	1.544	0.331	1.643	0.1	1.014	2.35	0.0412564
BARX2	0.574	0.217	2.644	0.008	1.776	0.386	2.012	0.044	1.16	2.717	0.00740018
PBX4	-0.423	0.214	-1.975	0.048	0.655	0.14	-2.458	0.014	0.431	0.997	0.0464634
ZNF610	-0.439	0.213	-2.063	0.039	0.644	0.137	-2.59	0.01	0.425	0.978	0.0373947
ITIH4	-0.65	0.217	-2.99	0.003	0.522	0.113	-4.211	0	0.341	0.799	0.00234755
LRRC37A3	-0.46	0.215	-2.135	0.033	0.631	0.136	-2.711	0.007	0.414	0.963	0.0311844
EBF1	0.483	0.213	2.262	0.024	1.621	0.346	1.794	0.073	1.067	2.463	0.0222323
MFAP5	0.446	0.217	2.058	0.04	1.562	0.339	1.66	0.097	1.021	2.39	0.037811
TMEM17	0.44	0.215	2.044	0.041	1.553	0.335	1.653	0.098	1.018	2.369	0.0391643
C5orf56	-0.562	0.215	-2.615	0.009	0.57	0.122	-3.509	0	0.374	0.869	0.00809313
RHBG	-0.42	0.214	-1.965	0.049	0.657	0.14	-2.442	0.015	0.432	0.999	0.0476779
NFKBID	-0.442	0.214	-2.069	0.039	0.643	0.137	-2.602	0.009	0.423	0.977	0.0368984
IPCEF1	-0.676	0.218	-3.106	0.002	0.509	0.111	-4.438	0	0.332	0.779	0.00156089
PVRIG	-0.476	0.213	-2.236	0.025	0.621	0.132	-2.865	0.004	0.409	0.943	0.0240734
TNNT1	0.435	0.216	2.015	0.044	1.545	0.334	1.634	0.102	1.012	2.36	0.0420281
NRN1	-0.578	0.217	-2.666	0.008	0.561	0.122	-3.61	0	0.367	0.858	0.00690805
BEND6	0.518	0.216	2.393	0.017	1.679	0.363	1.868	0.062	1.098	2.566	0.0154249
ZAP70	-0.471	0.213	-2.207	0.027	0.625	0.133	-2.819	0.005	0.411	0.949	0.0259461
HHIPL1	0.573	0.217	2.644	0.008	1.774	0.385	2.013	0.044	1.16	2.714	0.00734686
ADRA2A	0.478	0.214	2.233	0.026	1.614	0.346	1.775	0.076	1.06	2.456	0.0242074
POLR3G	0.581	0.214	2.717	0.007	1.789	0.383	2.06	0.039	1.176	2.721	0.00584838
RGMA	0.653	0.218	2.992	0.003	1.921	0.419	2.197	0.028	1.253	2.947	0.00232537
TTLL7	0.563	0.216	2.601	0.009	1.756	0.38	1.989	0.047	1.149	2.684	0.00843108
CASQ1	-0.438	0.213	-2.055	0.04	0.646	0.137	-2.578	0.01	0.425	0.98	0.0382269
SOX2	0.5	0.215	2.328	0.02	1.649	0.354	1.832	0.067	1.082	2.512	0.0187648
SAMD13	-0.43	0.215	-1.998	0.046	0.65	0.14	-2.496	0.013	0.426	0.992	0.0438896
ABCC9	0.628	0.217	2.889	0.004	1.874	0.407	2.145	0.032	1.224	2.869	0.00331454
GOLGA7B	-0.442	0.215	-2.057	0.04	0.643	0.138	-2.587	0.01	0.422	0.979	0.038145
HPSE	0.481	0.214	2.243	0.025	1.617	0.347	1.78	0.075	1.062	2.462	0.0235106
ZNF860	0.436	0.213	2.04	0.041	1.546	0.33	1.654	0.098	1.017	2.349	0.0396524
SEMA3D	0.535	0.219	2.438	0.015	1.707	0.374	1.888	0.059	1.111	2.624	0.013543
POU5F1	-0.464	0.214	-2.169	0.03	0.629	0.135	-2.76	0.006	0.413	0.956	0.0284757
ZNF365	0.455	0.215	2.12	0.034	1.576	0.338	1.703	0.089	1.035	2.401	0.0323544
KRT222	0.552	0.218	2.529	0.011	1.737	0.379	1.943	0.052	1.132	2.664	0.0104452
IL23A	-0.433	0.213	-2.037	0.042	0.648	0.138	-2.549	0.011	0.427	0.984	0.0402158
BCL2L14	-0.787	0.219	-3.586	0	0.455	0.1	-5.453	0	0.296	0.7	0.000234575
S1PR4	-0.423	0.214	-1.971	0.049	0.655	0.14	-2.454	0.014	0.43	0.998	0.0469301
PPM1J	0.599	0.216	2.773	0.006	1.821	0.393	2.086	0.037	1.192	2.781	0.00486832
MAP2	0.653	0.217	3.012	0.003	1.921	0.417	2.211	0.027	1.256	2.939	0.00216823
GPR35	-0.595	0.215	-2.765	0.006	0.552	0.119	-3.778	0	0.362	0.841	0.00502748
PCDHB7	0.473	0.214	2.207	0.027	1.605	0.344	1.758	0.079	1.054	2.443	0.0259132
AOC2	-0.646	0.217	-2.98	0.003	0.524	0.114	-4.187	0	0.343	0.802	0.00243106
ADAMTS12	0.531	0.218	2.437	0.015	1.701	0.371	1.89	0.059	1.11	2.609	0.01355
PID1	0.485	0.214	2.264	0.024	1.625	0.348	1.794	0.073	1.067	2.473	0.022091
DTX1	0.446	0.214	2.079	0.038	1.562	0.335	1.678	0.093	1.026	2.378	0.0359827
SCN4B	0.573	0.213	2.685	0.007	1.773	0.378	2.044	0.041	1.167	2.693	0.00648678
SHC3	-0.426	0.213	-1.998	0.046	0.653	0.139	-2.491	0.013	0.43	0.992	0.044088
SLC6A11	0.525	0.215	2.445	0.014	1.69	0.363	1.902	0.057	1.11	2.574	0.013412
ZGLP1	-0.579	0.217	-2.668	0.008	0.56	0.122	-3.615	0	0.366	0.857	0.00679805
FITM2	0.687	0.218	3.148	0.002	1.987	0.433	2.278	0.023	1.296	3.047	0.00133091
IL7	-0.584	0.214	-2.725	0.006	0.558	0.12	-3.701	0	0.366	0.849	0.00574823
APLP1	0.586	0.218	2.688	0.007	1.798	0.392	2.034	0.042	1.172	2.757	0.00640118
MUC15	0.478	0.214	2.234	0.025	1.612	0.345	1.776	0.076	1.06	2.452	0.024282
PRR16	0.444	0.215	2.062	0.039	1.559	0.336	1.665	0.096	1.022	2.379	0.0374202
NAP1L2	0.423	0.213	1.987	0.047	1.526	0.325	1.621	0.105	1.006	2.316	0.0452388
ST3GAL6	0.49	0.216	2.272	0.023	1.632	0.352	1.796	0.072	1.07	2.491	0.0216468
C17orf67	-0.441	0.215	-2.054	0.04	0.643	0.138	-2.582	0.01	0.422	0.98	0.0384912
PCDHB8	0.747	0.218	3.426	0.001	2.111	0.461	2.413	0.016	1.377	3.238	0.000462157
PCSK5	0.647	0.216	2.995	0.003	1.91	0.413	2.205	0.027	1.251	2.917	0.00229367
SLC26A1	-0.464	0.215	-2.157	0.031	0.629	0.135	-2.745	0.006	0.412	0.958	0.0294742
PCDHB11	0.788	0.22	3.581	0	2.199	0.484	2.478	0.013	1.429	3.386	0.000240168
MAMSTR	0.553	0.215	2.575	0.01	1.739	0.374	1.978	0.048	1.141	2.649	0.00912643
RBM11	-0.514	0.214	-2.404	0.016	0.598	0.128	-3.144	0.002	0.393	0.909	0.0150211
MPZL3	0.437	0.215	2.03	0.042	1.548	0.334	1.644	0.1	1.015	2.362	0.040685
CDH2	0.483	0.217	2.227	0.026	1.621	0.351	1.766	0.077	1.06	2.479	0.0243539
LONRF3	-0.559	0.216	-2.593	0.01	0.572	0.123	-3.474	0.001	0.374	0.872	0.00867417
SERPINB2	0.733	0.218	3.357	0.001	2.082	0.455	2.379	0.017	1.357	3.194	0.000602404
PRKCQ	-0.557	0.214	-2.601	0.009	0.573	0.123	-3.481	0.001	0.377	0.872	0.00847591
UNC5CL	-0.502	0.214	-2.346	0.019	0.605	0.13	-3.048	0.002	0.398	0.921	0.0177359
SLC30A4	0.499	0.215	2.317	0.021	1.647	0.355	1.824	0.068	1.08	2.512	0.019218
FBXL16	0.438	0.213	2.053	0.04	1.549	0.33	1.663	0.096	1.02	2.353	0.0385638
MESP1	0.466	0.214	2.178	0.029	1.594	0.341	1.741	0.082	1.048	2.424	0.028056
IL9R	-0.467	0.215	-2.166	0.03	0.627	0.135	-2.76	0.006	0.411	0.957	0.0286735
SYT15	-0.448	0.216	-2.075	0.038	0.639	0.138	-2.617	0.009	0.419	0.976	0.0363526
KIAA1644	0.557	0.215	2.584	0.01	1.745	0.376	1.982	0.048	1.144	2.662	0.00881572
ANKRD34A	0.423	0.213	1.987	0.047	1.527	0.325	1.62	0.105	1.006	2.319	0.0450012
FGF1	0.486	0.217	2.245	0.025	1.626	0.352	1.778	0.075	1.064	2.485	0.0234517
SLC25A34	-0.507	0.215	-2.363	0.018	0.602	0.129	-3.077	0.002	0.396	0.917	0.0168451
S100A1	-0.522	0.217	-2.409	0.016	0.593	0.129	-3.163	0.002	0.388	0.907	0.0148005
CHL1	0.507	0.213	2.377	0.017	1.661	0.354	1.864	0.062	1.093	2.523	0.0163109
CNTNAP3	0.455	0.213	2.139	0.032	1.576	0.335	1.719	0.086	1.039	2.391	0.0308871
KREMEN2	0.558	0.217	2.578	0.01	1.748	0.378	1.976	0.048	1.143	2.672	0.00897219
DCLK1	0.438	0.215	2.031	0.042	1.549	0.334	1.645	0.1	1.015	2.363	0.0404597
BICC1	0.443	0.216	2.052	0.04	1.557	0.336	1.658	0.097	1.02	2.377	0.0382931
PTGER3	0.558	0.217	2.567	0.01	1.747	0.38	1.967	0.049	1.141	2.675	0.00927275
GCSH	0.452	0.216	2.09	0.037	1.572	0.34	1.681	0.093	1.029	2.403	0.0348615

## Sheet: lncRNAs
Table S1: Univariate Cox regression analysis of PCGs, lncRNAs and microRNAs in the training set (n = 200).
lncRNAs	coefficient	se	z	p	HR	HRse	HRz	HRp	HRCILL	HRCIUL	log_rank_p
HCP5	-0.446	0.213	-2.091	0.037	0.64	0.137	-2.634	0.008	0.422	0.973	0.0351784
DLEU1	0.725	0.22	3.295	0.001	2.064	0.454	2.344	0.019	1.341	3.176	0.000775896
C1orf213	-0.525	0.216	-2.433	0.015	0.592	0.128	-3.2	0.001	0.388	0.903	0.0138064
GHRLOS	-0.428	0.215	-1.996	0.046	0.652	0.14	-2.492	0.013	0.428	0.992	0.0442405
PSORS1C3	-0.47	0.215	-2.187	0.029	0.625	0.134	-2.792	0.005	0.41	0.952	0.0272572

## Sheet: microRNAs
Table S1: Univariate Cox regression analysis of PCGs, lncRNAs and microRNAs in the training set (n = 200).
microRNAs	coefficient	se	z	p	HR	HRse	HRz	HRp	HRCILL	HRCIUL	log_rank_p
hsa-miR-23a-3p	0.437	0.213	2.047	0.041	1.547	0.33	1.658	0.097	1.019	2.35	0.0391517
hsa-miR-181a-5p	-0.682	0.219	-3.119	0.002	0.506	0.111	-4.472	0	0.329	0.776	0.00148375
hsa-miR-199a-5p	0.504	0.218	2.31	0.021	1.655	0.361	1.815	0.07	1.079	2.537	0.0196031
hsa-miR-17-3p	-0.603	0.216	-2.785	0.005	0.547	0.118	-3.822	0	0.358	0.836	0.0047073
hsa-miR-134-5p	0.471	0.216	2.184	0.029	1.601	0.345	1.742	0.082	1.049	2.443	0.0273468
hsa-miR-193a-5p	0.495	0.216	2.296	0.022	1.641	0.354	1.811	0.07	1.075	2.504	0.0203479
hsa-miR-625-3p	-0.466	0.214	-2.18	0.029	0.628	0.134	-2.777	0.005	0.413	0.954	0.0278391
hsa-miR-126-5p	0.43	0.213	2.016	0.044	1.537	0.327	1.639	0.101	1.012	2.333	0.0421231
hsa-miR-199b-5p	0.488	0.216	2.255	0.024	1.629	0.353	1.784	0.074	1.066	2.49	0.0228042
hsa-miR-574-3p	0.483	0.215	2.245	0.025	1.622	0.349	1.78	0.075	1.063	2.473	0.0233454
hsa-miR-944	-0.628	0.217	-2.897	0.004	0.533	0.116	-4.033	0	0.349	0.816	0.00323974
hsa-miR-143-5p	0.568	0.219	2.595	0.009	1.765	0.386	1.98	0.048	1.149	2.71	0.00849517
hsa-miR-652-3p	-0.488	0.215	-2.271	0.023	0.614	0.132	-2.927	0.003	0.403	0.935	0.0218539
hsa-miR-3065-3p	0.435	0.214	2.032	0.042	1.545	0.33	1.648	0.099	1.016	2.349	0.0406149
hsa-miR-337-3p	0.518	0.215	2.403	0.016	1.678	0.361	1.876	0.061	1.1	2.559	0.015086
hsa-miR-1287-5p	-0.591	0.218	-2.712	0.007	0.554	0.121	-3.698	0	0.361	0.849	0.0058971
hsa-miR-214-5p	0.465	0.219	2.119	0.034	1.592	0.349	1.695	0.09	1.036	2.447	0.0323675
hsa-miR-497-5p	0.525	0.215	2.444	0.015	1.69	0.363	1.901	0.057	1.11	2.576	0.0134796
hsa-miR-758-3p	0.587	0.218	2.696	0.007	1.799	0.392	2.039	0.041	1.174	2.757	0.00620612
hsa-miR-432-5p	0.493	0.217	2.275	0.023	1.637	0.355	1.796	0.072	1.071	2.503	0.0214948
hsa-miR-370-3p	0.441	0.218	2.024	0.043	1.554	0.339	1.637	0.102	1.014	2.382	0.0411829
hsa-miR-3913-5p	-0.461	0.214	-2.15	0.032	0.631	0.135	-2.731	0.006	0.415	0.96	0.0298993
hsa-miR-153-5p	0.445	0.214	2.082	0.037	1.561	0.334	1.68	0.093	1.026	2.374	0.0357682
hsa-let-7c-3p	0.559	0.217	2.581	0.01	1.749	0.379	1.977	0.048	1.144	2.674	0.00895428
hsa-let-7a-2-3p	0.636	0.217	2.936	0.003	1.889	0.409	2.173	0.03	1.235	2.887	0.00283711
hsa-miR-323a-3p	0.495	0.217	2.286	0.022	1.64	0.355	1.803	0.071	1.073	2.508	0.0208579
hsa-miR-625-5p	-0.738	0.216	-3.417	0.001	0.478	0.103	-5.055	0	0.313	0.73	0.000478563
hsa-miR-1271-5p	0.42	0.213	1.973	0.049	1.522	0.324	1.611	0.107	1.003	2.31	0.0466877
hsa-miR-1249-3p	0.504	0.214	2.354	0.019	1.655	0.354	1.849	0.064	1.088	2.518	0.0173805
hsa-miR-33b-5p	0.477	0.215	2.213	0.027	1.611	0.347	1.76	0.078	1.056	2.457	0.0255673
hsa-miR-195-3p	0.56	0.216	2.595	0.009	1.75	0.377	1.988	0.047	1.147	2.67	0.00855905
hsa-miR-129-5p	0.465	0.213	2.189	0.029	1.592	0.338	1.751	0.08	1.05	2.415	0.0272037
hsa-miR-656-3p	0.579	0.219	2.647	0.008	1.785	0.391	2.009	0.045	1.162	2.742	0.00724087
hsa-miR-891a-5p	0.476	0.215	2.213	0.027	1.609	0.346	1.761	0.078	1.056	2.453	0.0254003
