# Supplementary material for: An RNA-sequencing-based transcriptome for a significantly prognostic novel driver signature identification in bladder urothelial carcinoma
Source: PeerJ. 2020 Jul 21;8:e9422. doi: 10.7717/peerj.9422 (PMC7380276; doi:10.7717/peerj.9422)
Supplement: Supplemental Information 7 [file peerj-08-9422-s007.xlsx]

## Sheet: multi-transcriptome-signature
Table S2: The signature composed of PCGs, lncRNAs and microRNAs in the training (n = 200), test set (n = 200) and entire set (n = 400).
multi-transcriptome-signature	BLCA_Train_AUC	BLCA_Train_KM-P	BLCA_Train_COX_coefficient	BLCA_Train_COX_p-value	BLCA_Train_COX_HR	BLCA_Train_COX_HRCILL	BLCA_Train_COX_HRCIUL	BLCA_Test_AUC	BLCA_Test_KM-P	BLCA_Test_COX_coefficient	BLCA_Test_COX_p-value	BLCA_Test_COX_HR	BLCA_Test_COX_HRCILL	BLCA_Test_COX_HRCIUL	BLCA_Entire_AUC	BLCA_Entire_KM-P	BLCA_Entire_COX_coefficient	BLCA_Entire_COX_p-value	BLCA_Entire_COX_HR	BLCA_Entire_COX_HRCILL	BLCA_Entire_COX_HRCIUL
ANXA1	0.674747	1.56939e-05	0.932	0	2.539	1.639	3.933	0.58087	0.0625086	0.405	0.064	1.5	0.977	2.302	0.628216	3.89783e-06	0.706	0	2.025	1.492	2.749
TPST1	0.650505	0.00028993	0.781	0	2.183	1.416	3.365	0.636931	0.049211	0.435	0.051	1.545	0.998	2.391	0.645168	8.65424e-05	0.602	0	1.825	1.345	2.476
PSMB10	0.656263	2.19142e-05	0.913	0	2.491	1.611	3.851	0.541995	0.69416	-0.086	0.694	0.918	0.598	1.407	0.599568	0.000678596	0.519	0.001	1.68	1.241	2.274
DLEU1	0.607727	0.000775896	0.725	0.001	2.064	1.341	3.176	0.595499	0.290514	-0.232	0.291	0.793	0.515	1.22	0.601765	0.00238094	0.464	0.003	1.59	1.176	2.15
PSORS1C3	0.588384	0.0272572	0.47	0.029	1.6	1.05	2.439	0.669974	0.0372134	-0.466	0.039	0.628	0.403	0.977	0.627505	0.00252172	-0.465	0.003	0.628	0.464	0.852
HCP5	0.593939	0.0351784	0.446	0.037	1.562	1.028	2.372	0.527673	0.407769	0.18	0.409	1.197	0.781	1.836	0.533308	0.469456	0.109	0.469	1.116	0.829	1.501
hsa-miR-193a-5p	0.603333	0.0203479	0.495	0.022	1.641	1.075	2.504	0.539847	0.391333	-0.188	0.391	0.829	0.539	1.274	0.569575	0.046654	-0.304	0.047	0.738	0.546	0.997
hsa-miR-181a-5p	0.558687	0.00148375	0.682	0.002	1.978	1.288	3.035	0.592327	0.0845039	0.377	0.086	1.458	0.948	2.242	0.572902	0.00107393	0.499	0.001	1.646	1.217	2.227
hsa-miR-497-5p	0.566667	0.0134796	0.525	0.015	1.69	1.11	2.576	0.546189	0.327973	0.214	0.329	1.239	0.806	1.904	0.556444	0.0194725	0.356	0.02	1.427	1.057	1.926
ANXA1_TPST1	0.702323	1.75548e-06	1.038	0	2.824	1.81	4.405	0.58711	0.0241225	0.492	0.025	1.635	1.063	2.516	0.655213	6.11074e-08	0.834	0	2.302	1.688	3.139
ANXA1_PSMB10	0.732424	2.37636e-08	1.232	0	3.429	2.166	5.428	0.566752	0.0123168	0.55	0.013	1.733	1.121	2.678	0.654502	8.25475e-07	0.756	0	2.13	1.566	2.897
ANXA1_DLEU1	0.686162	3.87414e-05	0.885	0	2.423	1.569	3.743	0.549974	0.429616	0.172	0.428	1.188	0.776	1.821	0.64541	1.92944e-06	0.727	0	2.068	1.524	2.807
ANXA1_PSORS1C3	0.675455	2.48508e-05	0.911	0	2.487	1.605	3.853	0.553043	0.264297	-0.244	0.266	0.783	0.51	1.204	0.608584	6.51202e-05	0.608	0	1.838	1.357	2.488
ANXA1_HCP5	0.706162	5.35294e-05	0.877	0	2.404	1.55	3.73	0.581483	0.0625086	0.405	0.064	1.5	0.977	2.302	0.640686	3.51787e-05	0.632	0	1.882	1.388	2.552
ANXA1_hsa-miR-193a-5p	0.680202	3.69109e-06	1.002	0	2.725	1.752	4.238	0.566752	0.0440251	0.438	0.046	1.55	1.009	2.382	0.619098	3.80856e-06	0.705	0	2.024	1.492	2.745
ANXA1_hsa-miR-181a-5p	0.668384	0.000566552	0.734	0.001	2.084	1.36	3.193	0.589463	0.0243519	0.49	0.026	1.632	1.062	2.509	0.630375	0.000122068	0.583	0	1.791	1.325	2.421
ANXA1_hsa-miR-497-5p	0.704949	4.03365e-06	1.001	0	2.72	1.746	4.236	0.585678	0.0335937	0.463	0.035	1.588	1.033	2.441	0.642463	6.69304e-07	0.763	0	2.145	1.576	2.919
TPST1_PSMB10	0.695253	0.000360735	0.765	0	2.149	1.397	3.306	0.532685	0.685452	-0.088	0.685	0.915	0.597	1.404	0.655924	0.000145349	0.584	0	1.793	1.321	2.434
TPST1_DLEU1	0.664646	9.57252e-05	0.838	0	2.312	1.5	3.564	0.55601	0.849075	-0.042	0.848	0.959	0.626	1.471	0.673117	1.77653e-05	0.661	0	1.936	1.424	2.632
TPST1_PSORS1C3	0.643434	0.000153378	0.808	0	2.244	1.461	3.448	0.657391	0.15519	-0.316	0.157	0.729	0.471	1.129	0.606527	0.00242573	0.461	0.003	1.585	1.174	2.141
TPST1_HCP5	0.667576	0.00143298	0.682	0.002	1.978	1.29	3.034	0.604399	0.11444	0.348	0.117	1.417	0.917	2.189	0.629816	0.0103289	0.39	0.011	1.477	1.094	1.993
TPST1_hsa-miR-193a-5p	0.656566	8.43867e-05	0.85	0	2.34	1.512	3.62	0.496471	0.872301	-0.035	0.871	0.965	0.63	1.478	0.618514	0.00538147	0.424	0.006	1.529	1.131	2.066
TPST1_hsa-miR-181a-5p	0.650505	4.39527e-05	0.885	0	2.423	1.564	3.756	0.630793	0.0699967	0.399	0.072	1.49	0.965	2.301	0.647111	1.89242e-05	0.658	0	1.932	1.421	2.627
TPST1_hsa-miR-497-5p	0.664949	0.000392361	0.77	0.001	2.159	1.396	3.339	0.586701	0.159664	0.31	0.162	1.364	0.883	2.107	0.64	0.0027908	0.459	0.003	1.582	1.168	2.143
PSMB10_DLEU1	0.690909	2.38463e-07	1.126	0	3.082	1.97	4.822	0.601125	0.76075	-0.067	0.76	0.935	0.608	1.439	0.645892	1.00358e-05	0.68	0	1.975	1.452	2.686
PSMB10_PSORS1C3	0.674747	1.98363e-05	0.922	0	2.515	1.622	3.897	0.671509	0.0713638	-0.401	0.073	0.669	0.431	1.039	0.589029	0.00101244	0.502	0.001	1.652	1.221	2.235
PSMB10_HCP5	0.661515	0.000257186	0.783	0	2.188	1.423	3.363	0.54844	0.883856	0.032	0.885	1.032	0.673	1.583	0.600229	0.00153203	0.483	0.002	1.621	1.199	2.192
PSMB10_hsa-miR-193a-5p	0.679798	0.000110424	0.829	0	2.29	1.487	3.527	0.544757	0.539747	0.134	0.541	1.143	0.744	1.756	0.577625	0.0122795	0.382	0.013	1.465	1.084	1.978
PSMB10_hsa-miR-181a-5p	0.650505	3.60975e-06	0.994	0	2.703	1.746	4.185	0.50179	0.389003	0.188	0.39	1.207	0.786	1.856	0.608102	0.000726311	0.515	0.001	1.673	1.237	2.262
PSMB10_hsa-miR-497-5p	0.666465	2.2629e-05	0.907	0	2.477	1.606	3.82	0.504041	0.459659	0.161	0.462	1.174	0.766	1.801	0.613638	0.00026632	0.554	0	1.741	1.287	2.355
DLEU1_PSORS1C3	0.614343	0.00176323	0.667	0.002	1.948	1.273	2.981	0.68491	0.00640824	-0.626	0.007	0.535	0.339	0.845	0.557841	0.124146	0.233	0.125	1.262	0.938	1.699
DLEU1_HCP5	0.643838	1.46922e-05	0.93	0	2.535	1.641	3.917	0.56532	0.953791	-0.013	0.952	0.987	0.642	1.516	0.592584	0.000424454	0.537	0	1.71	1.265	2.313
DLEU1_hsa-miR-193a-5p	0.62596	0.00283463	0.638	0.003	1.892	1.236	2.895	0.576266	0.882523	-0.032	0.882	0.968	0.631	1.485	0.560203	0.113937	0.24	0.115	1.271	0.944	1.711
DLEU1_hsa-miR-181a-5p	0.598081	0.000232473	0.792	0	2.208	1.434	3.4	0.524297	0.740474	0.072	0.742	1.074	0.701	1.647	0.620927	2.8657e-05	0.643	0	1.902	1.4	2.584
DLEU1_hsa-miR-497-5p	0.637879	2.28755e-05	0.914	0	2.495	1.613	3.861	0.560818	0.363936	-0.198	0.364	0.82	0.534	1.258	0.618413	2.56702e-05	0.646	0	1.907	1.405	2.59
PSORS1C3_HCP5	0.627172	0.0156467	0.512	0.017	1.669	1.097	2.541	0.66711	0.0380423	-0.465	0.04	0.628	0.404	0.978	0.549613	0.0431545	0.306	0.044	1.358	1.008	1.829
PSORS1C3_hsa-miR-193a-5p	0.600202	0.0181914	0.503	0.02	1.654	1.084	2.524	0.64757	0.23902	-0.259	0.241	0.772	0.501	1.19	0.590756	0.0260867	-0.34	0.027	0.711	0.526	0.962
PSORS1C3_hsa-miR-181a-5p	0.57596	0.161158	0.296	0.163	1.345	0.887	2.04	0.655141	0.0130624	-0.557	0.014	0.573	0.367	0.894	0.529448	0.0264594	0.337	0.027	1.401	1.039	1.888
PSORS1C3_hsa-miR-497-5p	0.596768	0.000458817	0.747	0.001	2.111	1.377	3.237	0.655345	0.0509351	-0.437	0.053	0.646	0.415	1.005	0.539556	0.0726971	0.273	0.074	1.314	0.974	1.772
HCP5_hsa-miR-193a-5p	0.625859	0.0021879	0.65	0.003	1.916	1.255	2.926	0.534322	0.325465	-0.217	0.326	0.805	0.523	1.241	0.492089	0.729933	0.052	0.729	1.054	0.783	1.418
HCP5_hsa-miR-181a-5p	0.590808	0.0263723	0.469	0.028	1.599	1.053	2.429	0.602046	0.0729829	0.393	0.075	1.482	0.961	2.283	0.558908	0.0592775	0.286	0.06	1.331	0.988	1.793
HCP5_hsa-miR-497-5p	0.599293	0.0217255	0.485	0.023	1.625	1.07	2.469	0.551816	0.309068	0.222	0.31	1.249	0.813	1.917	0.554997	0.0320253	0.325	0.033	1.384	1.027	1.864
hsa-miR-193a-5p_hsa-miR-181a-5p	0.572222	0.0713882	0.382	0.073	1.465	0.965	2.225	0.517442	0.784921	0.059	0.786	1.061	0.693	1.624	0.540394	0.273499	0.166	0.274	1.181	0.877	1.59
hsa-miR-193a-5p_hsa-miR-497-5p	0.595859	0.0033447	0.626	0.004	1.87	1.223	2.861	0.531151	0.533592	-0.136	0.532	0.873	0.57	1.337	0.532419	0.354413	0.14	0.355	1.151	0.855	1.549
hsa-miR-181a-5p_hsa-miR-497-5p	0.560303	0.0739014	0.378	0.075	1.46	0.962	2.216	0.599488	0.0173512	0.522	0.019	1.685	1.091	2.602	0.580419	0.00242337	0.461	0.003	1.586	1.174	2.143
ANXA1_TPST1_PSMB10	0.744545	3.25736e-09	1.321	0	3.747	2.347	5.981	0.566547	0.0123168	0.55	0.013	1.733	1.121	2.678	0.675352	2.64544e-07	0.792	0	2.208	1.62	3.008
ANXA1_TPST1_DLEU1	0.710202	0.000118168	0.828	0	2.29	1.484	3.533	0.555806	0.168241	0.3	0.169	1.351	0.88	2.072	0.670298	1.67392e-07	0.8	0	2.226	1.637	3.028
ANXA1_TPST1_PSORS1C3	0.703232	4.37016e-07	1.101	0	3.006	1.92	4.707	0.545985	0.41626	-0.177	0.417	0.837	0.545	1.286	0.635251	1.02261e-05	0.675	0	1.963	1.447	2.664
ANXA1_TPST1_HCP5	0.738586	1.75249e-05	0.936	0	2.549	1.637	3.969	0.588338	0.0241225	0.492	0.025	1.635	1.063	2.516	0.672381	2.72048e-06	0.72	0	2.055	1.511	2.795
ANXA1_TPST1_hsa-miR-193a-5p	0.70202	2.11337e-06	1.031	0	2.804	1.797	4.373	0.584246	0.00953295	0.566	0.01	1.761	1.142	2.715	0.648787	2.47556e-06	0.721	0	2.056	1.513	2.792
ANXA1_TPST1_hsa-miR-181a-5p	0.698485	1.63503e-05	0.928	0	2.53	1.634	3.917	0.593862	0.024826	0.489	0.026	1.63	1.06	2.507	0.659733	1.04762e-06	0.745	0	2.106	1.551	2.859
ANXA1_TPST1_hsa-miR-497-5p	0.726566	6.03877e-07	1.079	0	2.943	1.887	4.588	0.589054	0.0154963	0.528	0.017	1.695	1.101	2.609	0.665473	3.12393e-08	0.854	0	2.348	1.72	3.207
ANXA1_PSMB10_DLEU1	0.743131	8.64548e-11	1.445	0	4.241	2.648	6.793	0.541688	0.167566	0.3	0.169	1.35	0.88	2.071	0.666971	2.2818e-07	0.795	0	2.215	1.626	3.017
ANXA1_PSMB10_PSORS1C3	0.731111	2.37636e-08	1.232	0	3.429	2.166	5.428	0.557954	0.987364	0.004	0.987	1.004	0.655	1.538	0.634463	6.11339e-06	0.693	0	2	1.472	2.716
ANXA1_PSMB10_HCP5	0.737879	1.06775e-07	1.166	0	3.21	2.039	5.054	0.565729	0.0983094	0.362	0.1	1.436	0.933	2.21	0.657752	1.66131e-05	0.659	0	1.933	1.424	2.624
ANXA1_PSMB10_hsa-miR-193a-5p	0.735152	5.23074e-08	1.204	0	3.334	2.106	5.277	0.549565	0.146054	0.317	0.147	1.372	0.894	2.106	0.646222	2.61346e-06	0.716	0	2.047	1.509	2.777
ANXA1_PSMB10_hsa-miR-181a-5p	0.727677	3.57015e-07	1.119	0	3.061	1.948	4.811	0.57555	0.00797087	0.579	0.009	1.784	1.157	2.751	0.653613	9.29627e-07	0.749	0	2.116	1.558	2.874
ANXA1_PSMB10_hsa-miR-497-5p	0.743333	1.23984e-07	1.17	0	3.222	2.038	5.095	0.569412	0.0621188	0.407	0.064	1.502	0.977	2.309	0.662705	4.38116e-07	0.775	0	2.172	1.595	2.956
ANXA1_DLEU1_PSORS1C3	0.685051	0.00056063	0.74	0.001	2.096	1.364	3.222	0.575652	0.518485	-0.142	0.518	0.868	0.565	1.334	0.623594	1.76541e-05	0.656	0	1.926	1.421	2.612
ANXA1_DLEU1_HCP5	0.712121	6.59726e-05	0.863	0	2.37	1.532	3.669	0.55243	0.286312	0.233	0.286	1.262	0.823	1.934	0.65346	7.42461e-06	0.689	0	1.991	1.464	2.706
ANXA1_DLEU1_hsa-miR-193a-5p	0.696364	1.90053e-05	0.926	0	2.525	1.628	3.917	0.543223	0.0819746	0.378	0.084	1.46	0.951	2.24	0.634387	7.2582e-06	0.683	0	1.98	1.461	2.683
ANXA1_DLEU1_hsa-miR-181a-5p	0.677172	8.08501e-05	0.845	0	2.328	1.511	3.587	0.559898	0.417938	0.177	0.417	1.193	0.779	1.828	0.645613	5.98211e-06	0.691	0	1.995	1.471	2.706
ANXA1_DLEU1_hsa-miR-497-5p	0.71404	5.23859e-06	0.985	0	2.678	1.724	4.161	0.555806	0.126451	0.332	0.128	1.394	0.909	2.138	0.661384	1.701e-06	0.736	0	2.088	1.534	2.841
ANXA1_PSORS1C3_HCP5	0.708586	4.1801e-05	0.884	0	2.42	1.564	3.743	0.554476	0.379788	-0.193	0.38	0.825	0.536	1.268	0.630527	7.01802e-05	0.608	0	1.837	1.355	2.491
ANXA1_PSORS1C3_hsa-miR-193a-5p	0.679596	4.56846e-07	1.096	0	2.992	1.915	4.676	0.543223	0.197269	-0.285	0.199	0.752	0.487	1.162	0.603251	0.000360284	0.542	0	1.719	1.272	2.324
ANXA1_PSORS1C3_hsa-miR-181a-5p	0.668788	0.000161067	0.806	0	2.24	1.457	3.442	0.561841	0.299234	-0.228	0.3	0.796	0.517	1.225	0.605079	0.00221175	0.465	0.002	1.591	1.179	2.148
ANXA1_PSORS1C3_hsa-miR-497-5p	0.705859	4.03365e-06	1.001	0	2.72	1.746	4.236	0.546496	0.831011	-0.047	0.83	0.954	0.623	1.463	0.621232	4.80609e-05	0.619	0	1.857	1.371	2.515
ANXA1_HCP5_hsa-miR-193a-5p	0.713434	2.70183e-05	0.917	0	2.501	1.606	3.894	0.570332	0.0979527	0.361	0.099	1.434	0.934	2.202	0.630146	0.000140494	0.581	0	1.787	1.32	2.42
ANXA1_HCP5_hsa-miR-181a-5p	0.703232	1.57397e-05	0.93	0	2.535	1.638	3.925	0.588951	0.0243519	0.49	0.026	1.632	1.062	2.509	0.641321	7.67781e-05	0.603	0	1.827	1.349	2.473
ANXA1_HCP5_hsa-miR-497-5p	0.723535	2.03676e-07	1.132	0	3.102	1.98	4.861	0.584962	0.0579441	0.412	0.059	1.51	0.984	2.319	0.65374	5.15425e-07	0.771	0	2.162	1.588	2.943
ANXA1_hsa-miR-193a-5p_hsa-miR-181a-5p	0.674242	4.32354e-05	0.877	0	2.405	1.558	3.71	0.570844	0.05775	0.413	0.059	1.512	0.984	2.323	0.623517	1.98809e-05	0.647	0	1.91	1.412	2.585
ANXA1_hsa-miR-193a-5p_hsa-miR-497-5p	0.71	1.05189e-05	0.959	0	2.608	1.675	4.06	0.56757	0.0717557	0.391	0.073	1.479	0.964	2.27	0.635454	5.82478e-07	0.765	0	2.149	1.581	2.923
ANXA1_hsa-miR-181a-5p_hsa-miR-497-5p	0.7	1.02122e-05	0.961	0	2.614	1.678	4.071	0.588951	0.0620445	0.406	0.064	1.5	0.977	2.304	0.64607	3.57445e-05	0.632	0	1.882	1.388	2.552
TPST1_PSMB10_DLEU1	0.711818	6.56141e-08	1.184	0	3.266	2.08	5.129	0.594783	0.906325	-0.026	0.905	0.974	0.634	1.497	0.68607	1.31944e-06	0.752	0	2.122	1.553	2.899
TPST1_PSMB10_PSORS1C3	0.700808	1.03299e-05	0.956	0	2.601	1.674	4.041	0.666292	0.0665433	-0.408	0.068	0.665	0.428	1.031	0.634921	0.000380172	0.545	0	1.724	1.272	2.338
TPST1_PSMB10_HCP5	0.700808	0.00027718	0.78	0	2.182	1.418	3.358	0.534731	0.9685	-0.009	0.967	0.991	0.646	1.52	0.65219	0.00255197	0.461	0.003	1.586	1.172	2.145
TPST1_PSMB10_hsa-miR-193a-5p	0.706667	1.06596e-05	0.951	0	2.587	1.669	4.011	0.521841	0.456151	0.163	0.457	1.177	0.766	1.807	0.635403	0.0023327	0.464	0.003	1.59	1.176	2.15
TPST1_PSMB10_hsa-miR-181a-5p	0.689091	1.14247e-05	0.951	0	2.589	1.667	4.02	0.508031	0.560021	0.127	0.561	1.136	0.739	1.746	0.665625	5.70279e-07	0.775	0	2.17	1.59	2.962
TPST1_PSMB10_hsa-miR-497-5p	0.705657	1.38498e-05	0.942	0	2.565	1.651	3.983	0.503836	0.459659	0.161	0.462	1.174	0.766	1.801	0.661308	1.22066e-05	0.673	0	1.96	1.441	2.665
TPST1_DLEU1_PSORS1C3	0.661313	0.000569376	0.737	0.001	2.09	1.361	3.207	0.678363	0.0167829	-0.541	0.018	0.582	0.372	0.912	0.636241	0.0250722	0.34	0.026	1.405	1.042	1.894
TPST1_DLEU1_HCP5	0.695152	3.33373e-05	0.891	0	2.438	1.58	3.763	0.538824	0.78121	0.06	0.783	1.062	0.692	1.629	0.665905	1.58572e-05	0.664	0	1.943	1.429	2.642
TPST1_DLEU1_hsa-miR-193a-5p	0.677273	3.47172e-05	0.891	0	2.437	1.577	3.765	0.543325	0.221661	-0.268	0.223	0.765	0.497	1.177	0.649829	0.000649205	0.524	0.001	1.688	1.245	2.288
TPST1_DLEU1_hsa-miR-181a-5p	0.665051	0.000578174	0.742	0.001	2.1	1.364	3.233	0.506701	0.693429	0.085	0.695	1.089	0.71	1.67	0.679543	4.12159e-07	0.788	0	2.198	1.608	3.005
TPST1_DLEU1_hsa-miR-497-5p	0.684646	6.25336e-07	1.084	0	2.957	1.894	4.619	0.533811	0.400805	-0.183	0.401	0.833	0.543	1.276	0.673498	0.000186827	0.574	0	1.775	1.308	2.408
TPST1_PSORS1C3_HCP5	0.680909	0.000659648	0.732	0.001	2.078	1.352	3.195	0.658619	0.0658209	-0.41	0.068	0.664	0.427	1.03	0.627048	0.0211486	0.35	0.022	1.419	1.052	1.914
TPST1_PSORS1C3_hsa-miR-193a-5p	0.656768	0.00434893	0.612	0.005	1.844	1.203	2.828	0.627519	0.165942	-0.307	0.168	0.735	0.475	1.138	0.591314	0.00453896	0.431	0.005	1.539	1.14	2.077
TPST1_PSORS1C3_hsa-miR-181a-5p	0.654646	0.000175113	0.804	0	2.235	1.452	3.442	0.64665	0.0689683	-0.403	0.071	0.669	0.432	1.035	0.602006	0.000891826	0.507	0.001	1.66	1.227	2.245
TPST1_PSORS1C3_hsa-miR-497-5p	0.66798	9.06332e-05	0.844	0	2.326	1.506	3.594	0.644194	0.190376	-0.291	0.192	0.747	0.483	1.157	0.611962	0.00241983	0.465	0.003	1.592	1.176	2.157
TPST1_HCP5_hsa-miR-193a-5p	0.686263	0.000621609	0.73	0.001	2.076	1.354	3.184	0.487161	0.594635	-0.116	0.595	0.891	0.582	1.364	0.605283	0.06533	0.279	0.066	1.322	0.981	1.781
TPST1_HCP5_hsa-miR-181a-5p	0.664545	0.000736241	0.721	0.001	2.057	1.341	3.154	0.634271	0.0477816	0.44	0.05	1.553	1.001	2.409	0.635048	0.000319075	0.551	0	1.735	1.28	2.35
TPST1_HCP5_hsa-miR-497-5p	0.678485	5.22456e-05	0.874	0	2.396	1.548	3.707	0.585882	0.212904	0.274	0.214	1.315	0.853	2.027	0.632584	0.000524213	0.531	0.001	1.7	1.255	2.303
TPST1_hsa-miR-193a-5p_hsa-miR-181a-5p	0.659091	0.000124742	0.831	0	2.295	1.484	3.55	0.520102	0.66519	0.094	0.666	1.098	0.717	1.682	0.627403	0.000171921	0.576	0	1.778	1.311	2.411
TPST1_hsa-miR-193a-5p_hsa-miR-497-5p	0.676364	4.4937e-05	0.888	0	2.431	1.565	3.777	0.486138	0.606306	-0.112	0.605	0.894	0.584	1.369	0.618565	0.000873946	0.511	0.001	1.667	1.229	2.259
TPST1_hsa-miR-181a-5p_hsa-miR-497-5p	0.664242	3.74474e-05	0.898	0	2.456	1.58	3.818	0.621688	0.0277545	0.483	0.029	1.621	1.05	2.503	0.650463	1.12024e-06	0.756	0	2.131	1.56	2.91
PSMB10_DLEU1_PSORS1C3	0.695657	5.45152e-07	1.089	0	2.97	1.903	4.637	0.68624	0.128747	-0.339	0.13	0.712	0.459	1.106	0.624711	5.58825e-05	0.622	0	1.863	1.37	2.533
PSMB10_DLEU1_HCP5	0.693636	1.41024e-07	1.146	0	3.146	2.011	4.924	0.601841	0.607639	-0.114	0.607	0.893	0.579	1.376	0.638603	0.000159711	0.58	0	1.787	1.316	2.425
PSMB10_DLEU1_hsa-miR-193a-5p	0.700606	4.62243e-07	1.101	0	3.007	1.922	4.704	0.581176	0.822939	-0.05	0.822	0.951	0.617	1.468	0.622476	0.000443089	0.537	0.001	1.711	1.263	2.317
PSMB10_DLEU1_hsa-miR-181a-5p	0.689596	2.52711e-05	0.907	0	2.478	1.603	3.829	0.545473	0.927819	0.02	0.929	1.02	0.662	1.57	0.649473	3.78137e-06	0.713	0	2.039	1.498	2.776
PSMB10_DLEU1_hsa-miR-497-5p	0.701818	7.99524e-08	1.178	0	3.249	2.069	5.103	0.548747	0.796771	0.056	0.799	1.057	0.689	1.624	0.66146	1.73034e-06	0.738	0	2.093	1.536	2.852
PSMB10_PSORS1C3_HCP5	0.679293	1.05207e-05	0.947	0	2.579	1.667	3.99	0.670895	0.0735346	-0.399	0.075	0.671	0.433	1.042	0.59327	0.00326354	0.448	0.004	1.565	1.158	2.115
PSMB10_PSORS1C3_hsa-miR-193a-5p	0.684747	1.86381e-05	0.924	0	2.519	1.626	3.902	0.644604	0.420644	-0.177	0.422	0.838	0.544	1.29	0.570768	0.023415	0.345	0.024	1.411	1.046	1.904
PSMB10_PSORS1C3_hsa-miR-181a-5p	0.663939	0.0022305	0.656	0.003	1.927	1.256	2.956	0.648798	0.0986315	-0.368	0.101	0.692	0.446	1.074	0.58179	0.0115434	0.383	0.012	1.467	1.088	1.979
PSMB10_PSORS1C3_hsa-miR-497-5p	0.685354	8.11191e-06	0.967	0	2.631	1.693	4.089	0.650946	0.143774	-0.325	0.145	0.722	0.467	1.119	0.603632	9.64934e-05	0.595	0	1.812	1.338	2.454
PSMB10_HCP5_hsa-miR-193a-5p	0.676263	0.000122339	0.823	0	2.278	1.479	3.507	0.545166	0.756869	0.068	0.758	1.07	0.696	1.645	0.578184	0.012212	0.38	0.013	1.463	1.084	1.974
PSMB10_HCP5_hsa-miR-181a-5p	0.650101	1.23757e-05	0.936	0	2.551	1.652	3.939	0.48399	0.264504	0.242	0.266	1.274	0.831	1.954	0.607213	0.000849778	0.507	0.001	1.661	1.229	2.245
PSMB10_HCP5_hsa-miR-497-5p	0.667576	0.000278378	0.775	0	2.171	1.415	3.331	0.494527	0.239531	0.257	0.242	1.294	0.841	1.99	0.611098	4.00319e-05	0.626	0	1.869	1.38	2.532
PSMB10_hsa-miR-193a-5p_hsa-miR-181a-5p	0.666465	1.37179e-05	0.935	0	2.548	1.647	3.943	0.517442	0.895176	-0.029	0.893	0.971	0.634	1.489	0.591467	0.00255705	0.459	0.003	1.583	1.171	2.139
PSMB10_hsa-miR-193a-5p_hsa-miR-497-5p	0.681212	1.49386e-06	1.038	0	2.825	1.818	4.389	0.544757	0.667403	0.093	0.669	1.098	0.716	1.684	0.594006	0.00234095	0.463	0.003	1.589	1.176	2.146
PSMB10_hsa-miR-181a-5p_hsa-miR-497-5p	0.658889	6.70483e-06	0.964	0	2.622	1.698	4.051	0.530128	0.119084	0.342	0.122	1.408	0.913	2.171	0.619124	8.68796e-05	0.598	0	1.819	1.343	2.463
DLEU1_PSORS1C3_HCP5	0.652828	0.000288809	0.774	0	2.168	1.413	3.326	0.679795	0.0370507	-0.467	0.039	0.627	0.403	0.976	0.592635	0.000424454	0.537	0	1.71	1.265	2.313
DLEU1_PSORS1C3_hsa-miR-193a-5p	0.627374	0.000660054	0.73	0.001	2.076	1.351	3.189	0.663427	0.0828219	-0.387	0.085	0.679	0.437	1.055	0.469029	0.785565	0.041	0.785	1.042	0.774	1.403
DLEU1_PSORS1C3_hsa-miR-181a-5p	0.605657	4.29848e-05	0.889	0	2.432	1.57	3.769	0.66179	0.0609582	-0.42	0.063	0.657	0.422	1.022	0.573333	0.00176298	0.477	0.002	1.611	1.192	2.179
DLEU1_PSORS1C3_hsa-miR-497-5p	0.645455	6.39496e-06	0.985	0	2.679	1.72	4.173	0.675908	0.04208	-0.462	0.044	0.63	0.402	0.987	0.589435	0.00420597	0.436	0.005	1.547	1.145	2.09
DLEU1_HCP5_hsa-miR-193a-5p	0.664747	9.15893e-07	1.055	0	2.871	1.852	4.452	0.570537	0.376343	-0.195	0.376	0.823	0.535	1.266	0.570387	0.00753278	0.406	0.008	1.5	1.112	2.024
DLEU1_HCP5_hsa-miR-181a-5p	0.638586	0.000267469	0.777	0	2.174	1.418	3.333	0.511407	0.984374	0.004	0.986	1.004	0.655	1.539	0.604622	0.000493767	0.532	0.001	1.702	1.257	2.302
DLEU1_HCP5_hsa-miR-497-5p	0.655859	8.17865e-07	1.059	0	2.882	1.86	4.468	0.54312	0.712514	-0.081	0.712	0.923	0.602	1.414	0.609092	0.00130835	0.49	0.001	1.633	1.207	2.208
DLEU1_hsa-miR-193a-5p_hsa-miR-181a-5p	0.618384	0.00171093	0.674	0.002	1.963	1.278	3.014	0.550077	0.904568	-0.027	0.903	0.974	0.635	1.494	0.595022	0.000384894	0.541	0	1.718	1.27	2.325
DLEU1_hsa-miR-193a-5p_hsa-miR-497-5p	0.644848	0.00125124	0.693	0.002	2	1.302	3.072	0.569923	0.296482	-0.23	0.296	0.794	0.516	1.223	0.600635	0.00353025	0.444	0.004	1.56	1.154	2.107
DLEU1_hsa-miR-181a-5p_hsa-miR-497-5p	0.625657	0.000660724	0.73	0.001	2.075	1.352	3.186	0.502199	0.83747	0.044	0.839	1.045	0.683	1.6	0.635505	4.00883e-05	0.631	0	1.879	1.384	2.552
PSORS1C3_HCP5_hsa-miR-193a-5p	0.649192	0.00198382	0.659	0.002	1.932	1.264	2.955	0.644194	0.0966663	-0.371	0.099	0.69	0.444	1.072	0.526883	0.193398	0.197	0.194	1.218	0.905	1.639
PSORS1C3_HCP5_hsa-miR-181a-5p	0.615152	0.035251	0.448	0.037	1.565	1.028	2.382	0.649105	0.0313549	-0.481	0.033	0.618	0.397	0.962	0.547784	0.0820882	0.263	0.083	1.301	0.966	1.753
PSORS1C3_HCP5_hsa-miR-497-5p	0.639394	0.000144937	0.812	0	2.253	1.466	3.463	0.652072	0.157238	-0.315	0.159	0.73	0.471	1.131	0.568711	0.00627985	0.414	0.007	1.513	1.122	2.041
PSORS1C3_hsa-miR-193a-5p_hsa-miR-181a-5p	0.592222	0.0620946	0.396	0.064	1.485	0.977	2.258	0.638465	0.188202	-0.292	0.19	0.747	0.482	1.156	0.510298	0.251544	0.174	0.252	1.19	0.884	1.602
PSORS1C3_hsa-miR-193a-5p_hsa-miR-497-5p	0.611414	0.00274155	0.638	0.003	1.892	1.238	2.892	0.647366	0.0109158	-0.571	0.012	0.565	0.362	0.882	0.523251	0.441666	0.116	0.443	1.123	0.835	1.512
PSORS1C3_hsa-miR-181a-5p_hsa-miR-497-5p	0.597071	0.0449057	0.426	0.047	1.531	1.007	2.328	0.648184	0.0340949	-0.474	0.036	0.623	0.4	0.969	0.548825	0.0125934	0.378	0.013	1.46	1.083	1.969
HCP5_hsa-miR-193a-5p_hsa-miR-181a-5p	0.621414	0.00069414	0.717	0.001	2.048	1.342	3.126	0.513146	0.923023	0.021	0.925	1.021	0.665	1.566	0.543568	0.114707	0.239	0.115	1.27	0.943	1.71
HCP5_hsa-miR-193a-5p_hsa-miR-497-5p	0.63	0.000880861	0.709	0.001	2.031	1.327	3.109	0.524399	0.328303	-0.214	0.328	0.807	0.526	1.239	0.536483	0.118879	0.236	0.12	1.266	0.941	1.705
HCP5_hsa-miR-181a-5p_hsa-miR-497-5p	0.593838	0.00149019	0.673	0.002	1.96	1.285	2.99	0.604399	0.0979746	0.363	0.1	1.438	0.933	2.217	0.569752	0.0356561	0.318	0.036	1.375	1.02	1.852
hsa-miR-193a-5p_hsa-miR-181a-5p_hsa-miR-497-5p	0.587778	0.0263783	0.47	0.028	1.599	1.053	2.43	0.493708	0.720912	0.077	0.722	1.08	0.705	1.656	0.560025	0.0248432	0.34	0.026	1.405	1.042	1.895
ANXA1_TPST1_PSMB10_DLEU1	0.753636	5.07536e-10	1.388	0	4.008	2.505	6.414	0.540358	0.167566	0.3	0.169	1.35	0.88	2.071	0.688914	1.75703e-07	0.808	0	2.244	1.643	3.064
ANXA1_TPST1_PSMB10_PSORS1C3	0.744646	2.35906e-09	1.33	0	3.783	2.37	6.037	0.556317	0.478968	-0.155	0.479	0.856	0.558	1.315	0.6544	3.99259e-06	0.706	0	2.027	1.492	2.753
ANXA1_TPST1_PSMB10_HCP5	0.755152	2.97909e-09	1.329	0	3.779	2.36	6.05	0.566547	0.0983094	0.362	0.1	1.436	0.933	2.21	0.680762	1.26075e-07	0.817	0	2.264	1.658	3.092
ANXA1_TPST1_PSMB10_hsa-miR-193a-5p	0.745657	1.40392e-09	1.361	0	3.901	2.43	6.263	0.562148	0.146054	0.317	0.147	1.372	0.894	2.106	0.668673	3.80233e-06	0.707	0	2.029	1.494	2.755
ANXA1_TPST1_PSMB10_hsa-miR-181a-5p	0.741313	4.38463e-08	1.21	0	3.353	2.121	5.301	0.569105	0.0406779	0.446	0.042	1.562	1.016	2.402	0.677587	3.78061e-08	0.845	0	2.328	1.707	3.173
ANXA1_TPST1_PSMB10_hsa-miR-497-5p	0.758384	1.6203e-09	1.346	0	3.843	2.405	6.14	0.563274	0.181369	0.291	0.182	1.338	0.872	2.052	0.68259	1.77182e-10	0.988	0	2.686	1.959	3.684
ANXA1_TPST1_DLEU1_PSORS1C3	0.705556	4.4186e-05	0.882	0	2.415	1.56	3.737	0.566752	0.620067	-0.109	0.619	0.897	0.584	1.378	0.649879	5.20445e-06	0.7	0	2.014	1.481	2.738
ANXA1_TPST1_DLEU1_HCP5	0.738182	1.50054e-07	1.167	0	3.211	2.029	5.083	0.558772	0.108102	0.351	0.109	1.42	0.925	2.18	0.686171	3.20178e-06	0.719	0	2.053	1.507	2.796
ANXA1_TPST1_DLEU1_hsa-miR-193a-5p	0.718889	1.04737e-05	0.956	0	2.602	1.674	4.045	0.56	0.0719502	0.391	0.073	1.479	0.964	2.271	0.662883	4.09522e-06	0.707	0	2.028	1.492	2.758
ANXA1_TPST1_DLEU1_hsa-miR-181a-5p	0.704242	0.000253991	0.783	0	2.187	1.423	3.362	0.563069	0.2215	0.267	0.222	1.306	0.851	2.005	0.673371	4.80275e-07	0.771	0	2.162	1.59	2.94
ANXA1_TPST1_DLEU1_hsa-miR-497-5p	0.73303	5.75511e-08	1.18	0	3.254	2.077	5.098	0.559898	0.126451	0.332	0.128	1.394	0.909	2.138	0.682184	2.13967e-08	0.864	0	2.373	1.738	3.241
ANXA1_TPST1_PSORS1C3_HCP5	0.740202	3.38111e-07	1.119	0	3.06	1.947	4.81	0.548951	0.507945	-0.145	0.508	0.865	0.563	1.329	0.662502	8.99869e-06	0.681	0	1.975	1.454	2.683
ANXA1_TPST1_PSORS1C3_hsa-miR-193a-5p	0.704444	2.5577e-08	1.227	0	3.413	2.157	5.399	0.528184	0.216932	-0.272	0.219	0.762	0.494	1.175	0.63106	0.000159367	0.576	0	1.779	1.314	2.408
ANXA1_TPST1_PSORS1C3_hsa-miR-181a-5p	0.698485	1.63503e-05	0.928	0	2.53	1.634	3.917	0.555601	0.303878	-0.225	0.304	0.798	0.519	1.227	0.632076	0.00203881	0.469	0.002	1.598	1.183	2.158
ANXA1_TPST1_PSORS1C3_hsa-miR-497-5p	0.726061	6.03877e-07	1.079	0	2.943	1.887	4.588	0.541381	0.830959	-0.047	0.83	0.954	0.623	1.463	0.645333	2.2262e-06	0.724	0	2.063	1.518	2.802
ANXA1_TPST1_HCP5_hsa-miR-193a-5p	0.748788	1.56946e-05	0.949	0	2.583	1.652	4.039	0.585985	0.0300894	0.474	0.031	1.606	1.043	2.472	0.662095	5.4553e-05	0.616	0	1.852	1.367	2.51
ANXA1_TPST1_HCP5_hsa-miR-181a-5p	0.73303	1.04593e-06	1.066	0	2.904	1.855	4.545	0.593043	0.0111821	0.553	0.012	1.738	1.128	2.676	0.673473	1.7781e-06	0.735	0	2.085	1.532	2.838
ANXA1_TPST1_HCP5_hsa-miR-497-5p	0.747778	3.10865e-08	1.218	0	3.38	2.139	5.342	0.591509	0.0181465	0.515	0.019	1.674	1.087	2.578	0.680102	4.7711e-09	0.904	0	2.47	1.807	3.378
ANXA1_TPST1_hsa-miR-193a-5p_hsa-miR-181a-5p	0.704545	6.76725e-05	0.855	0	2.352	1.525	3.629	0.587417	0.00953295	0.566	0.01	1.761	1.142	2.715	0.653537	1.27015e-05	0.665	0	1.944	1.435	2.634
ANXA1_TPST1_hsa-miR-193a-5p_hsa-miR-497-5p	0.730909	4.03511e-06	1.001	0	2.72	1.746	4.238	0.584859	0.0458396	0.435	0.047	1.545	1.005	2.374	0.657676	2.74727e-07	0.789	0	2.2	1.616	2.995
ANXA1_TPST1_hsa-miR-181a-5p_hsa-miR-497-5p	0.71899	2.7465e-06	1.011	0	2.748	1.769	4.267	0.591304	0.0689885	0.396	0.071	1.485	0.967	2.28	0.668648	9.29721e-07	0.75	0	2.117	1.558	2.876
ANXA1_PSMB10_DLEU1_PSORS1C3	0.740909	3.75847e-09	1.296	0	3.656	2.31	5.785	0.57954	0.74871	-0.071	0.748	0.932	0.606	1.432	0.64541	1.28332e-05	0.666	0	1.947	1.435	2.64
ANXA1_PSMB10_DLEU1_HCP5	0.747576	2.55629e-10	1.399	0	4.053	2.544	6.456	0.542916	0.230667	0.262	0.231	1.3	0.846	1.996	0.669486	4.05007e-06	0.706	0	2.026	1.491	2.753
ANXA1_PSMB10_DLEU1_hsa-miR-193a-5p	0.745859	1.67856e-09	1.338	0	3.812	2.397	6.062	0.532992	0.425605	0.173	0.426	1.189	0.776	1.821	0.656533	1.56308e-06	0.736	0	2.087	1.536	2.837
ANXA1_PSMB10_DLEU1_hsa-miR-181a-5p	0.739394	5.09859e-11	1.461	0	4.312	2.692	6.908	0.547928	0.0866849	0.373	0.088	1.452	0.946	2.23	0.666159	6.72304e-09	0.891	0	2.437	1.786	3.325
ANXA1_PSMB10_DLEU1_hsa-miR-497-5p	0.759293	2.30338e-12	1.601	0	4.957	3.034	8.098	0.546803	0.50187	0.146	0.502	1.157	0.756	1.772	0.677054	3.86592e-08	0.852	0	2.344	1.714	3.205
ANXA1_PSMB10_PSORS1C3_HCP5	0.738586	7.61832e-08	1.179	0	3.251	2.065	5.119	0.558363	0.928449	0.02	0.928	1.02	0.665	1.565	0.640254	9.13879e-06	0.678	0	1.971	1.452	2.675
ANXA1_PSMB10_PSORS1C3_hsa-miR-193a-5p	0.73596	3.31651e-09	1.32	0	3.743	2.345	5.975	0.552941	0.53364	-0.136	0.535	0.873	0.568	1.342	0.6304	9.22443e-05	0.595	0	1.814	1.34	2.454
ANXA1_PSMB10_PSORS1C3_hsa-miR-181a-5p	0.727778	3.95717e-08	1.208	0	3.348	2.124	5.277	0.568491	0.772016	-0.064	0.771	0.938	0.611	1.441	0.62781	1.00683e-05	0.673	0	1.959	1.446	2.656
ANXA1_PSMB10_PSORS1C3_hsa-miR-497-5p	0.745152	1.2506e-09	1.365	0	3.916	2.439	6.286	0.449821	0.629695	0.104	0.631	1.11	0.725	1.7	0.642743	4.06585e-06	0.706	0	2.027	1.492	2.754
ANXA1_PSMB10_HCP5_hsa-miR-193a-5p	0.743535	2.34622e-07	1.128	0	3.088	1.97	4.841	0.54844	0.132256	0.328	0.134	1.388	0.904	2.13	0.64734	4.17521e-06	0.704	0	2.021	1.489	2.744
ANXA1_PSMB10_HCP5_hsa-miR-181a-5p	0.732323	1.41576e-07	1.155	0	3.173	2.018	4.99	0.571355	0.0306675	0.473	0.032	1.605	1.041	2.475	0.656762	8.01486e-07	0.755	0	2.128	1.565	2.892
ANXA1_PSMB10_HCP5_hsa-miR-497-5p	0.749091	7.24164e-08	1.19	0	3.289	2.079	5.201	0.568286	0.303415	0.225	0.304	1.252	0.816	1.922	0.666235	1.14816e-06	0.748	0	2.112	1.552	2.875
ANXA1_PSMB10_hsa-miR-193a-5p_hsa-miR-181a-5p	0.73101	1.25007e-07	1.161	0	3.194	2.03	5.025	0.556829	0.12623	0.334	0.128	1.396	0.909	2.145	0.647111	1.66163e-06	0.73	0	2.075	1.529	2.815
ANXA1_PSMB10_hsa-miR-193a-5p_hsa-miR-497-5p	0.744747	3.10893e-08	1.234	0	3.434	2.159	5.462	0.551509	0.167138	0.301	0.168	1.351	0.88	2.075	0.654781	1.74412e-05	0.658	0	1.93	1.422	2.619
ANXA1_PSMB10_hsa-miR-181a-5p_hsa-miR-497-5p	0.743333	4.99205e-08	1.2	0	3.321	2.104	5.242	0.579437	0.037735	0.454	0.039	1.575	1.023	2.425	0.662324	1.19991e-05	0.67	0	1.955	1.44	2.654
ANXA1_DLEU1_PSORS1C3_HCP5	0.712424	6.59726e-05	0.863	0	2.37	1.532	3.669	0.574936	0.998475	-0.001	0.998	0.999	0.651	1.534	0.641702	0.000133478	0.587	0	1.798	1.325	2.439
ANXA1_DLEU1_PSORS1C3_hsa-miR-193a-5p	0.697172	3.02096e-06	1.02	0	2.772	1.775	4.33	0.565729	0.904795	-0.026	0.906	0.974	0.634	1.498	0.615949	0.000381631	0.54	0	1.716	1.269	2.319
ANXA1_DLEU1_PSORS1C3_hsa-miR-181a-5p	0.67596	0.000198985	0.798	0	2.222	1.443	3.42	0.579233	0.827303	-0.048	0.827	0.953	0.621	1.463	0.619073	0.00129575	0.49	0.001	1.633	1.208	2.208
ANXA1_DLEU1_PSORS1C3_hsa-miR-497-5p	0.713636	1.32316e-05	0.937	0	2.553	1.649	3.95	0.56665	0.771982	-0.063	0.772	0.939	0.612	1.439	0.637994	5.15476e-05	0.618	0	1.855	1.369	2.513
ANXA1_DLEU1_HCP5_hsa-miR-193a-5p	0.724949	4.35012e-06	1.001	0	2.721	1.745	4.244	0.547315	0.0999967	0.359	0.101	1.432	0.932	2.2	0.642006	9.58227e-05	0.596	0	1.814	1.339	2.458
ANXA1_DLEU1_HCP5_hsa-miR-181a-5p	0.705051	7.01124e-07	1.081	0	2.947	1.885	4.608	0.561637	0.288525	0.231	0.289	1.26	0.822	1.932	0.655162	0.000131098	0.584	0	1.794	1.324	2.43
ANXA1_DLEU1_HCP5_hsa-miR-497-5p	0.731515	4.02158e-07	1.111	0	3.037	1.935	4.765	0.556419	0.355639	0.201	0.356	1.222	0.798	1.873	0.66786	2.99159e-08	0.853	0	2.347	1.72	3.203
ANXA1_DLEU1_hsa-miR-193a-5p_hsa-miR-181a-5p	0.687475	3.16626e-06	1.015	0	2.76	1.77	4.304	0.546087	0.149458	0.313	0.151	1.368	0.892	2.097	0.635327	1.68055e-05	0.656	0	1.927	1.422	2.611
ANXA1_DLEU1_hsa-miR-193a-5p_hsa-miR-497-5p	0.724444	2.59856e-06	1.022	0	2.778	1.782	4.331	0.544552	0.225553	0.263	0.227	1.301	0.849	1.993	0.650997	1.6846e-05	0.659	0	1.932	1.424	2.622
ANXA1_DLEU1_hsa-miR-181a-5p_hsa-miR-497-5p	0.706465	5.6043e-06	0.977	0	2.656	1.714	4.116	0.563069	0.283353	0.233	0.284	1.263	0.824	1.936	0.660546	4.69836e-05	0.623	0	1.864	1.374	2.527
ANXA1_PSORS1C3_HCP5_hsa-miR-193a-5p	0.718889	1.18674e-05	0.956	0	2.601	1.669	4.054	0.540563	0.657149	-0.097	0.657	0.908	0.591	1.393	0.621435	0.000186858	0.57	0	1.768	1.306	2.394
ANXA1_PSORS1C3_HCP5_hsa-miR-181a-5p	0.704343	2.24551e-05	0.909	0	2.481	1.607	3.83	0.558363	0.293297	-0.231	0.294	0.794	0.516	1.222	0.623746	0.000370464	0.541	0	1.718	1.271	2.322
ANXA1_PSORS1C3_HCP5_hsa-miR-497-5p	0.726566	4.03889e-07	1.097	0	2.995	1.92	4.674	0.546803	0.829075	-0.047	0.828	0.954	0.622	1.462	0.644571	4.15461e-06	0.703	0	2.021	1.489	2.743
ANXA1_PSORS1C3_hsa-miR-193a-5p_hsa-miR-181a-5p	0.675556	0.000138977	0.815	0	2.259	1.469	3.475	0.55376	0.305495	-0.226	0.307	0.798	0.518	1.23	0.600889	0.00105439	0.497	0.001	1.643	1.217	2.218
ANXA1_PSORS1C3_hsa-miR-193a-5p_hsa-miR-497-5p	0.708384	1.92493e-05	0.925	0	2.521	1.625	3.91	0.547621	0.753946	-0.068	0.755	0.934	0.609	1.432	0.618946	2.11637e-05	0.65	0	1.915	1.412	2.597
ANXA1_PSORS1C3_hsa-miR-181a-5p_hsa-miR-497-5p	0.703636	8.59247e-05	0.848	0	2.334	1.51	3.609	0.555396	0.318746	-0.219	0.319	0.804	0.523	1.236	0.617625	7.8764e-05	0.601	0	1.825	1.348	2.471
ANXA1_HCP5_hsa-miR-193a-5p_hsa-miR-181a-5p	0.711818	5.04499e-07	1.099	0	3	1.914	4.703	0.573811	0.0570845	0.415	0.059	1.514	0.985	2.327	0.634057	0.000366449	0.542	0	1.719	1.272	2.325
ANXA1_HCP5_hsa-miR-193a-5p_hsa-miR-497-5p	0.729192	3.30664e-07	1.113	0	3.044	1.943	4.769	0.571253	0.200485	0.279	0.201	1.321	0.862	2.026	0.643073	4.12577e-06	0.705	0	2.024	1.49	2.75
ANXA1_HCP5_hsa-miR-181a-5p_hsa-miR-497-5p	0.721111	2.91981e-08	1.214	0	3.368	2.138	5.306	0.588747	0.0620445	0.406	0.064	1.5	0.977	2.304	0.653714	8.75292e-08	0.823	0	2.277	1.67	3.103
ANXA1_hsa-miR-193a-5p_hsa-miR-181a-5p_hsa-miR-497-5p	0.700707	3.2801e-05	0.901	0	2.461	1.586	3.819	0.571765	0.0778539	0.383	0.079	1.467	0.956	2.252	0.638349	4.99971e-06	0.696	0	2.005	1.479	2.719
TPST1_PSMB10_DLEU1_PSORS1C3	0.711212	6.70437e-08	1.183	0	3.264	2.079	5.126	0.683887	0.188368	-0.292	0.19	0.746	0.482	1.155	0.661232	0.000264013	0.56	0	1.751	1.291	2.376
TPST1_PSMB10_DLEU1_HCP5	0.715051	1.90286e-08	1.24	0	3.455	2.189	5.453	0.594169	0.589368	-0.119	0.589	0.888	0.577	1.366	0.684292	2.51728e-06	0.727	0	2.07	1.519	2.821
TPST1_PSMB10_DLEU1_hsa-miR-193a-5p	0.721111	7.8628e-08	1.19	0	3.287	2.082	5.188	0.563683	0.825994	-0.049	0.825	0.952	0.617	1.47	0.66847	1.97332e-06	0.735	0	2.085	1.53	2.842
TPST1_PSMB10_DLEU1_hsa-miR-181a-5p	0.708283	8.72349e-09	1.27	0	3.56	2.254	5.625	0.553964	0.798988	-0.057	0.798	0.945	0.613	1.457	0.692902	1.02959e-08	0.891	0	2.438	1.779	3.341
TPST1_PSMB10_DLEU1_hsa-miR-497-5p	0.724747	6.58215e-08	1.191	0	3.29	2.088	5.183	0.550486	0.796771	0.056	0.799	1.057	0.689	1.624	0.697752	1.3584e-09	0.951	0	2.587	1.881	3.559
TPST1_PSMB10_PSORS1C3_HCP5	0.705051	1.60201e-05	0.929	0	2.533	1.636	3.922	0.666087	0.0655467	-0.41	0.067	0.664	0.428	1.03	0.638883	0.00861922	0.401	0.009	1.494	1.105	2.019
TPST1_PSMB10_PSORS1C3_hsa-miR-193a-5p	0.711717	3.34865e-08	1.209	0	3.35	2.127	5.278	0.634885	0.362842	-0.201	0.364	0.818	0.53	1.262	0.620622	0.0184097	0.358	0.019	1.431	1.06	1.931
TPST1_PSMB10_PSORS1C3_hsa-miR-181a-5p	0.694343	1.8626e-05	0.927	0	2.526	1.629	3.918	0.651355	0.0462299	-0.446	0.048	0.64	0.411	0.996	0.631771	8.2671e-05	0.604	0	1.83	1.348	2.484
TPST1_PSMB10_PSORS1C3_hsa-miR-497-5p	0.712929	9.68159e-07	1.072	0	2.921	1.864	4.578	0.649207	0.115598	-0.35	0.117	0.705	0.455	1.092	0.643657	0.000430691	0.54	0.001	1.716	1.266	2.327
TPST1_PSMB10_HCP5_hsa-miR-193a-5p	0.710404	2.87448e-06	1.012	0	2.752	1.769	4.279	0.524092	0.645878	0.1	0.646	1.105	0.721	1.696	0.634794	0.0249454	0.341	0.026	1.407	1.042	1.899
TPST1_PSMB10_HCP5_hsa-miR-181a-5p	0.69202	1.07624e-05	0.954	0	2.595	1.671	4.03	0.479898	0.264504	0.242	0.266	1.274	0.831	1.954	0.6624	1.90201e-07	0.806	0	2.239	1.64	3.056
TPST1_PSMB10_HCP5_hsa-miR-497-5p	0.705556	6.00535e-05	0.867	0	2.381	1.538	3.685	0.496675	0.239531	0.257	0.242	1.294	0.841	1.99	0.657905	7.64614e-05	0.605	0	1.831	1.351	2.484
TPST1_PSMB10_hsa-miR-193a-5p_hsa-miR-181a-5p	0.702525	1.36023e-06	1.057	0	2.876	1.838	4.5	0.492379	0.427293	0.173	0.429	1.189	0.774	1.825	0.646832	4.76807e-06	0.706	0	2.026	1.488	2.759
TPST1_PSMB10_hsa-miR-193a-5p_hsa-miR-497-5p	0.711111	1.27909e-07	1.157	0	3.18	2.024	4.997	0.467621	0.750812	0.069	0.752	1.071	0.699	1.642	0.646095	3.11748e-05	0.639	0	1.895	1.395	2.573
TPST1_PSMB10_hsa-miR-181a-5p_hsa-miR-497-5p	0.695152	2.34381e-06	1.025	0	2.786	1.789	4.34	0.487775	0.642912	0.101	0.645	1.106	0.719	1.702	0.670832	9.22178e-08	0.825	0	2.282	1.672	3.116
TPST1_DLEU1_PSORS1C3_HCP5	0.699192	6.05973e-06	0.979	0	2.661	1.714	4.132	0.673964	0.0742533	-0.398	0.076	0.672	0.433	1.043	0.65661	2.04341e-05	0.656	0	1.927	1.417	2.62
TPST1_DLEU1_PSORS1C3_hsa-miR-193a-5p	0.675253	1.96242e-05	0.92	0	2.509	1.622	3.882	0.64532	0.0627479	-0.418	0.065	0.658	0.423	1.026	0.61727	0.0787234	0.267	0.08	1.306	0.969	1.76
TPST1_DLEU1_PSORS1C3_hsa-miR-181a-5p	0.664444	0.000578174	0.742	0.001	2.1	1.364	3.233	0.659437	0.0609582	-0.42	0.063	0.657	0.422	1.022	0.637029	0.000429299	0.542	0.001	1.719	1.267	2.333
TPST1_DLEU1_PSORS1C3_hsa-miR-497-5p	0.682525	1.6012e-06	1.045	0	2.845	1.823	4.44	0.669668	0.0251668	-0.508	0.027	0.602	0.384	0.943	0.64066	0.0008899	0.51	0.001	1.665	1.228	2.257
TPST1_DLEU1_HCP5_hsa-miR-193a-5p	0.710909	3.58593e-06	0.997	0	2.709	1.749	4.197	0.53913	0.498051	-0.15	0.497	0.861	0.558	1.327	0.645486	0.000528283	0.528	0.001	1.696	1.254	2.294
TPST1_DLEU1_HCP5_hsa-miR-181a-5p	0.690707	0.000146828	0.815	0	2.259	1.467	3.478	0.501586	0.984374	0.004	0.986	1.004	0.655	1.539	0.670044	1.40235e-07	0.815	0	2.259	1.654	3.085
TPST1_DLEU1_HCP5_hsa-miR-497-5p	0.710404	4.66765e-05	0.88	0	2.411	1.558	3.731	0.524194	0.712514	-0.081	0.712	0.923	0.602	1.414	0.667911	1.10748e-07	0.823	0	2.276	1.666	3.11
TPST1_DLEU1_hsa-miR-193a-5p_hsa-miR-181a-5p	0.675556	0.000198978	0.802	0	2.231	1.446	3.441	0.521944	0.780348	0.06	0.782	1.062	0.693	1.628	0.66146	1.73723e-05	0.662	0	1.938	1.425	2.635
TPST1_DLEU1_hsa-miR-193a-5p_hsa-miR-497-5p	0.695354	1.11215e-08	1.255	0	3.509	2.223	5.538	0.539437	0.236209	-0.26	0.236	0.771	0.502	1.186	0.659454	0.000847919	0.511	0.001	1.667	1.231	2.257
TPST1_DLEU1_hsa-miR-181a-5p_hsa-miR-497-5p	0.684545	2.95819e-05	0.901	0	2.461	1.592	3.806	0.509872	0.276097	0.236	0.278	1.266	0.826	1.941	0.688508	7.65449e-07	0.769	0	2.158	1.579	2.949
TPST1_PSORS1C3_HCP5_hsa-miR-193a-5p	0.69596	2.04735e-05	0.928	0	2.528	1.626	3.932	0.628645	0.199679	-0.286	0.201	0.751	0.484	1.165	0.605638	0.06533	0.279	0.066	1.322	0.981	1.781
TPST1_PSORS1C3_HCP5_hsa-miR-181a-5p	0.674444	4.11943e-06	0.988	0	2.687	1.736	4.158	0.647059	0.0160744	-0.54	0.017	0.583	0.373	0.909	0.615314	0.0072035	0.41	0.008	1.507	1.115	2.036
TPST1_PSORS1C3_HCP5_hsa-miR-497-5p	0.695556	1.03562e-07	1.173	0	3.231	2.049	5.096	0.644501	0.159855	-0.313	0.161	0.732	0.472	1.133	0.630654	0.000524213	0.531	0.001	1.7	1.255	2.303
TPST1_PSORS1C3_hsa-miR-193a-5p_hsa-miR-181a-5p	0.662424	0.000301041	0.778	0	2.178	1.413	3.356	0.624041	0.219461	-0.271	0.221	0.762	0.494	1.177	0.590959	0.038939	0.314	0.04	1.368	1.015	1.845
TPST1_PSORS1C3_hsa-miR-193a-5p_hsa-miR-497-5p	0.674848	0.00018704	0.809	0	2.245	1.452	3.47	0.631816	0.111014	-0.356	0.113	0.7	0.451	1.088	0.599492	0.0135448	0.378	0.014	1.459	1.079	1.973
TPST1_PSORS1C3_hsa-miR-181a-5p_hsa-miR-497-5p	0.673737	3.21951e-05	0.9	0	2.458	1.586	3.81	0.643274	0.0620906	-0.415	0.064	0.66	0.425	1.024	0.609143	0.00354136	0.446	0.004	1.562	1.154	2.112
TPST1_HCP5_hsa-miR-193a-5p_hsa-miR-181a-5p	0.681616	8.50804e-05	0.844	0	2.327	1.508	3.59	0.525524	0.66881	0.093	0.67	1.097	0.716	1.68	0.617981	0.00306864	0.451	0.003	1.571	1.162	2.123
TPST1_HCP5_hsa-miR-193a-5p_hsa-miR-497-5p	0.689697	2.41389e-05	0.905	0	2.471	1.601	3.813	0.480409	0.52202	-0.14	0.521	0.87	0.568	1.332	0.614908	0.00185838	0.475	0.002	1.608	1.189	2.175
TPST1_HCP5_hsa-miR-181a-5p_hsa-miR-497-5p	0.677273	3.77482e-06	1.001	0	2.721	1.75	4.231	0.623836	0.0246002	0.496	0.026	1.642	1.061	2.544	0.637968	1.12754e-05	0.672	0	1.958	1.442	2.657
TPST1_hsa-miR-193a-5p_hsa-miR-181a-5p_hsa-miR-497-5p	0.671111	0.000471234	0.757	0.001	2.132	1.381	3.292	0.524706	0.947653	0.014	0.948	1.014	0.662	1.553	0.63294	0.0002693	0.558	0	1.748	1.289	2.369
PSMB10_DLEU1_PSORS1C3_HCP5	0.698182	8.18855e-09	1.261	0	3.527	2.241	5.551	0.683171	0.190947	-0.291	0.192	0.748	0.483	1.158	0.625625	0.000151175	0.581	0	1.788	1.318	2.425
PSMB10_DLEU1_PSORS1C3_hsa-miR-193a-5p	0.704444	1.21882e-06	1.055	0	2.873	1.843	4.48	0.659949	0.26087	-0.249	0.262	0.779	0.504	1.205	0.603759	0.00104216	0.499	0.001	1.648	1.219	2.228
PSMB10_DLEU1_PSORS1C3_hsa-miR-181a-5p	0.69202	8.06717e-09	1.263	0	3.537	2.246	5.571	0.655652	0.16449	-0.309	0.166	0.734	0.474	1.136	0.61374	8.59808e-05	0.601	0	1.824	1.345	2.472
PSMB10_DLEU1_PSORS1C3_hsa-miR-497-5p	0.708586	2.65606e-09	1.32	0	3.744	2.362	5.937	0.671304	0.0825736	-0.39	0.084	0.677	0.435	1.054	0.640279	1.93231e-05	0.656	0	1.928	1.419	2.619
PSMB10_DLEU1_HCP5_hsa-miR-193a-5p	0.704141	1.10935e-07	1.17	0	3.22	2.046	5.07	0.576061	0.902382	0.027	0.903	1.027	0.666	1.584	0.619022	2.66812e-05	0.644	0	1.904	1.403	2.585
PSMB10_DLEU1_HCP5_hsa-miR-181a-5p	0.690404	9.05362e-06	0.961	0	2.613	1.686	4.052	0.548133	0.840512	-0.045	0.839	0.956	0.621	1.473	0.642133	1.73635e-05	0.661	0	1.936	1.425	2.632
PSMB10_DLEU1_HCP5_hsa-miR-497-5p	0.70101	4.26746e-07	1.107	0	3.026	1.933	4.737	0.55335	0.86437	0.037	0.866	1.037	0.677	1.591	0.650057	7.90367e-06	0.688	0	1.989	1.462	2.705
PSMB10_DLEU1_hsa-miR-193a-5p_hsa-miR-181a-5p	0.698182	2.32772e-07	1.136	0	3.115	1.985	4.886	0.456471	0.160488	0.306	0.163	1.358	0.884	2.088	0.630324	7.41827e-07	0.765	0	2.149	1.576	2.93
PSMB10_DLEU1_hsa-miR-193a-5p_hsa-miR-497-5p	0.711212	2.51305e-08	1.229	0	3.419	2.167	5.393	0.570946	0.773635	-0.064	0.772	0.938	0.608	1.447	0.64386	1.2098e-06	0.75	0	2.116	1.553	2.884
PSMB10_DLEU1_hsa-miR-181a-5p_hsa-miR-497-5p	0.7	1.31985e-07	1.159	0	3.186	2.028	5.003	0.513043	0.66457	0.095	0.667	1.099	0.714	1.692	0.665676	2.03352e-06	0.734	0	2.083	1.529	2.838
PSMB10_PSORS1C3_HCP5_hsa-miR-193a-5p	0.686465	3.37674e-06	1	0	2.719	1.753	4.217	0.642558	0.498408	-0.15	0.498	0.861	0.557	1.329	0.575314	0.0129992	0.377	0.014	1.458	1.081	1.967
PSMB10_PSORS1C3_HCP5_hsa-miR-181a-5p	0.667576	6.70618e-05	0.86	0	2.363	1.529	3.653	0.646343	0.0986315	-0.368	0.101	0.692	0.446	1.074	0.582222	0.0060135	0.417	0.006	1.517	1.124	2.048
PSMB10_PSORS1C3_HCP5_hsa-miR-497-5p	0.689091	4.21707e-07	1.09	0	2.973	1.911	4.627	0.650435	0.181847	-0.295	0.183	0.744	0.482	1.15	0.608533	6.22863e-05	0.61	0	1.841	1.359	2.493
PSMB10_PSORS1C3_hsa-miR-193a-5p_hsa-miR-181a-5p	0.673535	4.41192e-05	0.88	0	2.41	1.559	3.726	0.628849	0.989846	-0.003	0.988	0.997	0.649	1.532	0.56861	0.00630624	0.415	0.007	1.514	1.122	2.044
PSMB10_PSORS1C3_hsa-miR-193a-5p_hsa-miR-497-5p	0.694444	9.46226e-08	1.164	0	3.201	2.04	5.023	0.640716	0.123812	-0.345	0.125	0.708	0.455	1.101	0.589689	0.00234095	0.463	0.003	1.589	1.176	2.146
PSMB10_PSORS1C3_hsa-miR-181a-5p_hsa-miR-497-5p	0.674848	7.92419e-05	0.849	0	2.338	1.514	3.609	0.636829	0.0947972	-0.371	0.096	0.69	0.446	1.068	0.595124	0.00180454	0.475	0.002	1.608	1.19	2.174
PSMB10_HCP5_hsa-miR-193a-5p_hsa-miR-181a-5p	0.666061	1.37179e-05	0.935	0	2.548	1.647	3.943	0.522148	0.603655	0.112	0.606	1.119	0.73	1.715	0.591086	0.00309962	0.45	0.003	1.568	1.161	2.118
PSMB10_HCP5_hsa-miR-193a-5p_hsa-miR-497-5p	0.680606	0.000129774	0.817	0	2.264	1.473	3.48	0.545371	0.649437	0.099	0.651	1.104	0.719	1.695	0.593702	0.000245136	0.559	0	1.749	1.292	2.367
PSMB10_HCP5_hsa-miR-181a-5p_hsa-miR-497-5p	0.658384	1.16325e-05	0.941	0	2.562	1.658	3.958	0.514066	0.317444	0.217	0.319	1.243	0.81	1.905	0.616863	0.000249494	0.557	0	1.746	1.291	2.362
PSMB10_hsa-miR-193a-5p_hsa-miR-181a-5p_hsa-miR-497-5p	0.672121	6.03278e-07	1.087	0	2.966	1.898	4.635	0.518261	0.728606	0.075	0.73	1.078	0.703	1.655	0.603302	0.00117234	0.496	0.001	1.641	1.213	2.221
DLEU1_PSORS1C3_HCP5_hsa-miR-193a-5p	0.675657	2.95116e-05	0.893	0	2.441	1.586	3.758	0.65954	0.185741	-0.297	0.187	0.743	0.478	1.155	0.574146	0.00820291	0.401	0.009	1.494	1.107	2.016
DLEU1_PSORS1C3_HCP5_hsa-miR-181a-5p	0.651414	0.000204978	0.794	0	2.212	1.44	3.397	0.65954	0.172893	-0.303	0.174	0.738	0.477	1.144	0.587708	0.000307636	0.551	0	1.735	1.281	2.349
DLEU1_PSORS1C3_HCP5_hsa-miR-497-5p	0.672929	4.3712e-06	0.987	0	2.682	1.733	4.15	0.669463	0.0503181	-0.439	0.052	0.645	0.414	1.004	0.608508	0.00130835	0.49	0.001	1.633	1.207	2.208
DLEU1_PSORS1C3_hsa-miR-193a-5p_hsa-miR-181a-5p	0.618182	0.00752698	0.574	0.008	1.775	1.159	2.72	0.647877	0.113492	-0.351	0.115	0.704	0.455	1.089	0.557587	0.0140997	0.373	0.015	1.453	1.076	1.96
DLEU1_PSORS1C3_hsa-miR-193a-5p_hsa-miR-497-5p	0.649798	0.000507786	0.748	0.001	2.112	1.373	3.249	0.664552	0.0167895	-0.547	0.018	0.578	0.367	0.911	0.577448	0.00252902	0.46	0.003	1.584	1.172	2.141
DLEU1_PSORS1C3_hsa-miR-181a-5p_hsa-miR-497-5p	0.633535	0.000180299	0.811	0	2.25	1.457	3.473	0.656982	0.0347223	-0.475	0.036	0.622	0.398	0.97	0.593295	0.00597651	0.417	0.006	1.518	1.125	2.049
DLEU1_HCP5_hsa-miR-193a-5p_hsa-miR-181a-5p	0.661818	6.58162e-06	0.974	0	2.648	1.708	4.106	0.546292	0.999543	-0.001	0.998	0.999	0.651	1.535	0.588444	0.00161585	0.48	0.002	1.616	1.196	2.183
DLEU1_HCP5_hsa-miR-193a-5p_hsa-miR-497-5p	0.673737	1.43717e-06	1.034	0	2.813	1.816	4.357	0.56133	0.722159	-0.079	0.72	0.924	0.601	1.421	0.594438	0.0276117	0.335	0.028	1.398	1.036	1.886
DLEU1_HCP5_hsa-miR-181a-5p_hsa-miR-497-5p	0.655152	2.45434e-06	1.011	0	2.749	1.777	4.252	0.495754	0.976658	0.006	0.979	1.006	0.656	1.543	0.620698	6.04051e-05	0.614	0	1.847	1.362	2.505
DLEU1_hsa-miR-193a-5p_hsa-miR-181a-5p_hsa-miR-497-5p	0.632424	0.0113672	0.539	0.012	1.714	1.124	2.613	0.537084	0.30237	-0.227	0.302	0.797	0.517	1.227	0.61666	0.000220097	0.564	0	1.759	1.298	2.382
PSORS1C3_HCP5_hsa-miR-193a-5p_hsa-miR-181a-5p	0.638384	0.00780876	0.568	0.009	1.766	1.155	2.699	0.633248	0.251467	-0.256	0.253	0.774	0.499	1.2	0.537829	0.231414	0.181	0.232	1.199	0.891	1.613
PSORS1C3_HCP5_hsa-miR-193a-5p_hsa-miR-497-5p	0.655152	0.000468078	0.745	0.001	2.107	1.375	3.229	0.640614	0.287999	-0.236	0.288	0.79	0.511	1.221	0.553346	0.0366486	0.316	0.037	1.372	1.019	1.849
PSORS1C3_HCP5_hsa-miR-181a-5p_hsa-miR-497-5p	0.626768	0.00327812	0.626	0.004	1.87	1.224	2.855	0.643785	0.0292574	-0.491	0.031	0.612	0.392	0.956	0.5632	0.0441347	0.305	0.045	1.357	1.007	1.827
PSORS1C3_hsa-miR-193a-5p_hsa-miR-181a-5p_hsa-miR-497-5p	0.613737	0.0139454	0.523	0.015	1.687	1.107	2.571	0.639795	0.0187742	-0.528	0.02	0.59	0.378	0.921	0.535365	0.032309	0.324	0.033	1.383	1.026	1.863
HCP5_hsa-miR-193a-5p_hsa-miR-181a-5p_hsa-miR-497-5p	0.624949	0.00158704	0.667	0.002	1.948	1.279	2.968	0.501893	0.663036	-0.095	0.661	0.909	0.594	1.392	0.553448	0.0728665	0.272	0.074	1.313	0.974	1.769
ANXA1_TPST1_PSMB10_DLEU1_PSORS1C3	0.749394	2.33937e-09	1.336	0	3.804	2.38	6.081	0.578517	0.90077	-0.028	0.9	0.973	0.634	1.493	0.666616	1.6217e-06	0.736	0	2.087	1.535	2.837
ANXA1_TPST1_PSMB10_DLEU1_HCP5	0.763939	6.12629e-11	1.465	0	4.326	2.69	6.956	0.542609	0.230667	0.262	0.231	1.3	0.846	1.996	0.693359	6.79022e-08	0.837	0	2.309	1.689	3.156
ANXA1_TPST1_PSMB10_DLEU1_hsa-miR-193a-5p	0.759798	7.1818e-10	1.378	0	3.966	2.481	6.338	0.542711	0.277429	0.236	0.278	1.266	0.826	1.94	0.678654	5.251e-07	0.773	0	2.165	1.589	2.95
ANXA1_TPST1_PSMB10_DLEU1_hsa-miR-181a-5p	0.748485	1.65794e-08	1.239	0	3.451	2.189	5.441	0.538107	0.15242	0.311	0.154	1.365	0.89	2.094	0.688686	6.62172e-10	0.957	0	2.603	1.899	3.566
ANXA1_TPST1_PSMB10_DLEU1_hsa-miR-497-5p	0.766869	4.76678e-11	1.478	0	4.383	2.725	7.052	0.542916	0.50187	0.146	0.502	1.157	0.756	1.772	0.696584	1.03894e-11	1.06	0	2.885	2.096	3.971
ANXA1_TPST1_PSMB10_PSORS1C3_HCP5	0.755253	7.87578e-09	1.283	0	3.608	2.267	5.742	0.555192	0.910719	0.025	0.91	1.025	0.669	1.571	0.663416	2.50958e-05	0.645	0	1.906	1.405	2.587
ANXA1_TPST1_PSMB10_PSORS1C3_hsa-miR-193a-5p	0.746364	1.40392e-09	1.361	0	3.901	2.43	6.263	0.539437	0.801047	-0.055	0.802	0.947	0.616	1.454	0.651048	1.19712e-06	0.742	0	2.101	1.547	2.854
ANXA1_TPST1_PSMB10_PSORS1C3_hsa-miR-181a-5p	0.741919	3.06561e-08	1.223	0	3.398	2.149	5.374	0.572481	0.678256	-0.091	0.677	0.913	0.594	1.403	0.652292	3.09701e-07	0.784	0	2.19	1.61	2.979
ANXA1_TPST1_PSMB10_PSORS1C3_hsa-miR-497-5p	0.758182	3.43144e-10	1.409	0	4.094	2.547	6.58	0.448696	0.629695	0.104	0.631	1.11	0.725	1.7	0.662679	7.632e-07	0.76	0	2.138	1.571	2.91
ANXA1_TPST1_PSMB10_HCP5_hsa-miR-193a-5p	0.76	1.80036e-08	1.251	0	3.493	2.197	5.552	0.56133	0.0759277	0.387	0.078	1.473	0.958	2.263	0.672356	2.75228e-06	0.72	0	2.054	1.511	2.793
ANXA1_TPST1_PSMB10_HCP5_hsa-miR-181a-5p	0.746263	4.38463e-08	1.21	0	3.353	2.121	5.301	0.565217	0.0660463	0.402	0.068	1.495	0.971	2.301	0.682235	4.48157e-09	0.907	0	2.476	1.81	3.386
ANXA1_TPST1_PSMB10_HCP5_hsa-miR-497-5p	0.765051	2.9603e-08	1.233	0	3.432	2.159	5.454	0.564604	0.303415	0.225	0.304	1.252	0.816	1.922	0.688686	2.13003e-08	0.867	0	2.379	1.74	3.252
ANXA1_TPST1_PSMB10_hsa-miR-193a-5p_hsa-miR-181a-5p	0.745152	7.28688e-09	1.286	0	3.617	2.275	5.751	0.563683	0.12623	0.334	0.128	1.396	0.909	2.145	0.670629	3.64544e-09	0.906	0	2.473	1.812	3.375
ANXA1_TPST1_PSMB10_hsa-miR-193a-5p_hsa-miR-497-5p	0.760808	1.00906e-10	1.459	0	4.303	2.663	6.955	0.556829	0.210637	0.273	0.212	1.314	0.856	2.015	0.67553	8.73316e-08	0.822	0	2.276	1.67	3.101
ANXA1_TPST1_PSMB10_hsa-miR-181a-5p_hsa-miR-497-5p	0.753434	1.45807e-08	1.259	0	3.52	2.217	5.59	0.56798	0.0914813	0.367	0.093	1.444	0.941	2.217	0.68419	1.82569e-09	0.926	0	2.525	1.847	3.452
ANXA1_TPST1_DLEU1_PSORS1C3_HCP5	0.736566	3.81438e-08	1.228	0	3.413	2.145	5.431	0.571355	0.857401	0.039	0.858	1.04	0.678	1.595	0.671873	1.28293e-05	0.672	0	1.957	1.44	2.661
ANXA1_TPST1_DLEU1_PSORS1C3_hsa-miR-193a-5p	0.715253	1.58313e-06	1.049	0	2.854	1.825	4.464	0.550281	0.79302	0.057	0.792	1.059	0.69	1.625	0.644622	0.000120961	0.589	0	1.802	1.329	2.443
ANXA1_TPST1_DLEU1_PSORS1C3_hsa-miR-181a-5p	0.700707	0.00039193	0.761	0.001	2.141	1.392	3.294	0.57688	0.799342	-0.056	0.799	0.946	0.616	1.452	0.643835	0.000260746	0.557	0	1.746	1.29	2.364
ANXA1_TPST1_DLEU1_PSORS1C3_hsa-miR-497-5p	0.732727	3.11227e-07	1.111	0	3.038	1.944	4.748	0.562455	0.380402	-0.192	0.38	0.825	0.537	1.268	0.659276	5.63043e-07	0.768	0	2.156	1.584	2.935
ANXA1_TPST1_DLEU1_HCP5_hsa-miR-193a-5p	0.750808	1.7938e-09	1.363	0	3.906	2.423	6.295	0.558465	0.141349	0.32	0.143	1.378	0.898	2.114	0.673371	1.65335e-06	0.737	0	2.09	1.536	2.845
ANXA1_TPST1_DLEU1_HCP5_hsa-miR-181a-5p	0.73596	3.2852e-06	1.015	0	2.758	1.767	4.305	0.562967	0.394191	0.186	0.394	1.204	0.785	1.847	0.686349	7.4798e-07	0.762	0	2.144	1.573	2.92
ANXA1_TPST1_DLEU1_HCP5_hsa-miR-497-5p	0.756061	1.62364e-08	1.248	0	3.485	2.2	5.521	0.560512	0.250093	0.25	0.251	1.284	0.838	1.968	0.695162	4.5176e-08	0.848	0	2.334	1.707	3.191
ANXA1_TPST1_DLEU1_hsa-miR-193a-5p_hsa-miR-181a-5p	0.712121	5.42006e-05	0.873	0	2.395	1.547	3.709	0.562148	0.0719502	0.391	0.073	1.479	0.964	2.271	0.664254	2.59573e-07	0.788	0	2.199	1.617	2.99
ANXA1_TPST1_DLEU1_hsa-miR-193a-5p_hsa-miR-497-5p	0.742424	6.12203e-08	1.18	0	3.254	2.075	5.104	0.56	0.0772386	0.384	0.079	1.469	0.957	2.254	0.67134	5.45914e-07	0.772	0	2.164	1.588	2.948
ANXA1_TPST1_DLEU1_hsa-miR-181a-5p_hsa-miR-497-5p	0.728788	1.63002e-06	1.039	0	2.825	1.815	4.396	0.564194	0.283353	0.233	0.284	1.263	0.824	1.936	0.682337	1.214e-07	0.816	0	2.261	1.657	3.083
ANXA1_TPST1_PSORS1C3_HCP5_hsa-miR-193a-5p	0.749899	2.14077e-07	1.147	0	3.15	1.994	4.976	0.526445	0.971319	0.008	0.971	1.008	0.658	1.545	0.652825	0.000441208	0.537	0.001	1.711	1.264	2.317
ANXA1_TPST1_PSORS1C3_HCP5_hsa-miR-181a-5p	0.735051	1.85591e-07	1.135	0	3.112	1.986	4.876	0.556624	0.288859	-0.232	0.29	0.793	0.516	1.219	0.653816	5.07118e-05	0.622	0	1.862	1.372	2.528
ANXA1_TPST1_PSORS1C3_HCP5_hsa-miR-497-5p	0.750101	1.14909e-08	1.265	0	3.541	2.229	5.627	0.543018	0.996462	-0.001	0.996	0.999	0.652	1.53	0.668775	2.7865e-08	0.854	0	2.349	1.722	3.204
ANXA1_TPST1_PSORS1C3_hsa-miR-193a-5p_hsa-miR-181a-5p	0.704545	3.93574e-05	0.882	0	2.417	1.566	3.731	0.53954	0.202055	-0.282	0.204	0.754	0.488	1.166	0.62781	0.00856803	0.4	0.009	1.491	1.105	2.012
ANXA1_TPST1_PSORS1C3_hsa-miR-193a-5p_hsa-miR-497-5p	0.731414	4.03511e-06	1.001	0	2.72	1.746	4.238	0.531662	0.588617	-0.118	0.589	0.889	0.579	1.364	0.64259	2.85249e-06	0.716	0	2.047	1.507	2.78
ANXA1_TPST1_PSORS1C3_hsa-miR-181a-5p_hsa-miR-497-5p	0.718283	2.7465e-06	1.011	0	2.748	1.769	4.267	0.55202	0.318746	-0.219	0.319	0.804	0.523	1.236	0.64193	9.19836e-06	0.677	0	1.968	1.451	2.669
ANXA1_TPST1_HCP5_hsa-miR-193a-5p_hsa-miR-181a-5p	0.742828	3.92183e-07	1.116	0	3.052	1.94	4.802	0.587212	0.0223844	0.498	0.024	1.646	1.069	2.533	0.66461	9.79216e-06	0.678	0	1.97	1.451	2.677
ANXA1_TPST1_HCP5_hsa-miR-193a-5p_hsa-miR-497-5p	0.757273	1.1496e-09	1.355	0	3.878	2.425	6.201	0.586701	0.0926225	0.366	0.094	1.442	0.939	2.214	0.669892	2.22297e-08	0.858	0	2.358	1.73	3.213
ANXA1_TPST1_HCP5_hsa-miR-181a-5p_hsa-miR-497-5p	0.746061	3.70125e-08	1.203	0	3.329	2.115	5.239	0.591714	0.0620445	0.406	0.064	1.5	0.977	2.304	0.681803	3.38677e-08	0.85	0	2.339	1.714	3.191
ANXA1_TPST1_hsa-miR-193a-5p_hsa-miR-181a-5p_hsa-miR-497-5p	0.723232	8.00286e-06	0.965	0	2.626	1.691	4.077	0.586496	0.0503246	0.426	0.052	1.531	0.997	2.353	0.660902	2.47211e-07	0.791	0	2.206	1.621	3.003
ANXA1_PSMB10_DLEU1_PSORS1C3_HCP5	0.745657	6.60387e-10	1.365	0	3.914	2.461	6.226	0.579028	0.858258	-0.039	0.857	0.961	0.626	1.476	0.652013	3.3728e-06	0.712	0	2.037	1.5	2.768
ANXA1_PSMB10_DLEU1_PSORS1C3_hsa-miR-193a-5p	0.745253	4.92103e-09	1.298	0	3.661	2.303	5.818	0.572685	0.675876	0.091	0.675	1.096	0.715	1.679	0.638756	2.28729e-05	0.646	0	1.908	1.408	2.585
ANXA1_PSMB10_DLEU1_PSORS1C3_hsa-miR-181a-5p	0.739091	1.54706e-09	1.339	0	3.817	2.398	6.074	0.586189	0.672823	-0.092	0.673	0.912	0.594	1.399	0.639492	1.55751e-05	0.659	0	1.933	1.426	2.62
ANXA1_PSMB10_DLEU1_PSORS1C3_hsa-miR-497-5p	0.755152	1.04006e-10	1.449	0	4.258	2.647	6.849	0.57156	0.783753	0.059	0.785	1.061	0.693	1.625	0.656813	1.9376e-06	0.73	0	2.076	1.526	2.823
ANXA1_PSMB10_DLEU1_HCP5_hsa-miR-193a-5p	0.751212	2.01703e-11	1.507	0	4.512	2.798	7.276	0.531969	0.41196	0.178	0.412	1.195	0.78	1.83	0.658133	5.82662e-07	0.766	0	2.151	1.582	2.927
ANXA1_PSMB10_DLEU1_HCP5_hsa-miR-181a-5p	0.74303	1.16205e-11	1.523	0	4.587	2.844	7.399	0.548849	0.219599	0.268	0.221	1.307	0.851	2.006	0.669638	4.59673e-06	0.699	0	2.012	1.483	2.731
ANXA1_PSMB10_DLEU1_HCP5_hsa-miR-497-5p	0.761818	3.75356e-11	1.479	0	4.388	2.729	7.055	0.549156	0.210311	0.273	0.212	1.314	0.856	2.018	0.680432	2.80909e-08	0.857	0	2.356	1.725	3.218
ANXA1_PSMB10_DLEU1_hsa-miR-193a-5p_hsa-miR-181a-5p	0.741313	2.47735e-11	1.488	0	4.427	2.759	7.102	0.53688	0.296775	0.227	0.298	1.255	0.819	1.923	0.658108	1.13624e-06	0.745	0	2.107	1.55	2.864
ANXA1_PSMB10_DLEU1_hsa-miR-193a-5p_hsa-miR-497-5p	0.76202	2.41329e-12	1.599	0	4.95	3.03	8.087	0.534527	0.525752	0.138	0.526	1.148	0.749	1.759	0.665752	2.05569e-07	0.8	0	2.225	1.633	3.033
ANXA1_PSMB10_DLEU1_hsa-miR-181a-5p_hsa-miR-497-5p	0.754444	7.46958e-13	1.613	0	5.019	3.093	8.144	0.553555	0.443702	0.166	0.445	1.181	0.771	1.808	0.675403	1.38121e-08	0.876	0	2.401	1.758	3.28
ANXA1_PSMB10_PSORS1C3_HCP5_hsa-miR-193a-5p	0.742929	4.92891e-09	1.293	0	3.642	2.295	5.78	0.552123	0.590315	-0.118	0.591	0.889	0.578	1.366	0.63426	4.1452e-05	0.625	0	1.869	1.379	2.532
ANXA1_PSMB10_PSORS1C3_HCP5_hsa-miR-181a-5p	0.732525	9.75114e-08	1.171	0	3.226	2.05	5.078	0.569309	0.772016	-0.064	0.771	0.938	0.611	1.441	0.632203	3.51275e-05	0.631	0	1.88	1.387	2.548
ANXA1_PSMB10_PSORS1C3_HCP5_hsa-miR-497-5p	0.751717	5.90404e-08	1.198	0	3.313	2.094	5.239	0.449309	0.536337	0.134	0.537	1.144	0.747	1.752	0.6496	1.77658e-06	0.733	0	2.081	1.531	2.831
ANXA1_PSMB10_PSORS1C3_hsa-miR-193a-5p_hsa-miR-181a-5p	0.730808	1.2874e-09	1.35	0	3.859	2.421	6.149	0.562558	0.504129	-0.147	0.505	0.864	0.561	1.329	0.623263	5.44845e-05	0.614	0	1.848	1.365	2.501
ANXA1_PSMB10_PSORS1C3_hsa-miR-193a-5p_hsa-miR-497-5p	0.744848	1.3869e-08	1.262	0	3.534	2.221	5.623	0.553657	0.714402	-0.08	0.715	0.923	0.602	1.417	0.639543	1.90406e-05	0.654	0	1.922	1.417	2.608
ANXA1_PSMB10_PSORS1C3_hsa-miR-181a-5p_hsa-miR-497-5p	0.742323	6.20852e-08	1.192	0	3.295	2.088	5.2	0.570128	0.569493	-0.124	0.569	0.883	0.575	1.355	0.636419	1.37298e-05	0.664	0	1.943	1.432	2.635
ANXA1_PSMB10_HCP5_hsa-miR-193a-5p_hsa-miR-181a-5p	0.736061	5.18137e-07	1.096	0	2.992	1.911	4.684	0.551611	0.324602	0.214	0.325	1.239	0.808	1.898	0.647898	2.47743e-06	0.719	0	2.052	1.512	2.785
ANXA1_PSMB10_HCP5_hsa-miR-193a-5p_hsa-miR-497-5p	0.753939	2.79751e-08	1.224	0	3.401	2.15	5.379	0.546598	0.0863596	0.373	0.088	1.453	0.946	2.231	0.657067	7.10126e-07	0.762	0	2.143	1.574	2.917
ANXA1_PSMB10_HCP5_hsa-miR-181a-5p_hsa-miR-497-5p	0.746263	2.70154e-07	1.122	0	3.07	1.959	4.812	0.573504	0.067073	0.401	0.069	1.493	0.969	2.3	0.66527	3.55182e-06	0.71	0	2.035	1.498	2.765
ANXA1_PSMB10_hsa-miR-193a-5p_hsa-miR-181a-5p_hsa-miR-497-5p	0.745556	5.29123e-08	1.199	0	3.315	2.1	5.234	0.55335	0.616185	0.109	0.616	1.115	0.728	1.708	0.653968	7.2448e-06	0.688	0	1.99	1.465	2.704
ANXA1_DLEU1_PSORS1C3_HCP5_hsa-miR-193a-5p	0.725455	4.35012e-06	1.001	0	2.721	1.745	4.244	0.562251	0.620555	-0.109	0.62	0.897	0.582	1.38	0.630578	7.43472e-05	0.607	0	1.834	1.353	2.487
ANXA1_DLEU1_PSORS1C3_HCP5_hsa-miR-181a-5p	0.704747	7.01124e-07	1.081	0	2.947	1.885	4.608	0.577289	0.786671	0.059	0.788	1.06	0.692	1.624	0.637511	0.000612242	0.523	0.001	1.687	1.247	2.282
ANXA1_DLEU1_PSORS1C3_HCP5_hsa-miR-497-5p	0.731515	1.27297e-07	1.156	0	3.177	2.023	4.989	0.568389	0.962136	-0.011	0.961	0.989	0.646	1.516	0.656889	8.13846e-07	0.758	0	2.134	1.568	2.905
ANXA1_DLEU1_PSORS1C3_hsa-miR-193a-5p_hsa-miR-181a-5p	0.688586	6.62286e-06	0.981	0	2.666	1.712	4.152	0.57023	0.541415	-0.134	0.542	0.874	0.568	1.345	0.612521	0.000709743	0.515	0.001	1.673	1.238	2.261
ANXA1_DLEU1_PSORS1C3_hsa-miR-193a-5p_hsa-miR-497-5p	0.722525	1.62856e-05	0.929	0	2.532	1.635	3.921	0.564297	0.73963	-0.072	0.74	0.93	0.606	1.427	0.632533	0.000123739	0.584	0	1.793	1.325	2.427
ANXA1_DLEU1_PSORS1C3_hsa-miR-181a-5p_hsa-miR-497-5p	0.704242	2.28542e-06	1.015	0	2.761	1.781	4.28	0.576777	0.523978	-0.14	0.524	0.869	0.565	1.337	0.632356	7.04985e-05	0.606	0	1.833	1.353	2.482
ANXA1_DLEU1_HCP5_hsa-miR-193a-5p_hsa-miR-181a-5p	0.721515	3.14743e-08	1.219	0	3.383	2.143	5.343	0.551714	0.0907949	0.368	0.092	1.445	0.941	2.218	0.645689	0.000174752	0.572	0	1.773	1.309	2.4
ANXA1_DLEU1_HCP5_hsa-miR-193a-5p_hsa-miR-497-5p	0.743333	5.85894e-08	1.205	0	3.337	2.105	5.29	0.548235	0.114342	0.344	0.116	1.41	0.919	2.165	0.655467	1.02292e-06	0.749	0	2.115	1.555	2.876
ANXA1_DLEU1_HCP5_hsa-miR-181a-5p_hsa-miR-497-5p	0.729091	1.63492e-07	1.146	0	3.146	2.004	4.94	0.562455	0.608205	0.111	0.608	1.118	0.73	1.712	0.668597	3.26203e-08	0.847	0	2.333	1.713	3.179
ANXA1_DLEU1_hsa-miR-193a-5p_hsa-miR-181a-5p_hsa-miR-497-5p	0.716162	6.83009e-07	1.076	0	2.934	1.881	4.578	0.547417	0.293251	0.228	0.294	1.256	0.82	1.925	0.65026	6.79937e-05	0.607	0	1.835	1.355	2.485
ANXA1_PSORS1C3_HCP5_hsa-miR-193a-5p_hsa-miR-181a-5p	0.716263	1.44965e-07	1.156	0	3.176	2.017	5	0.54844	0.400545	-0.185	0.401	0.831	0.54	1.279	0.618032	0.000973525	0.5	0.001	1.649	1.221	2.227
ANXA1_PSORS1C3_HCP5_hsa-miR-193a-5p_hsa-miR-497-5p	0.731818	1.85674e-07	1.135	0	3.111	1.986	4.874	0.540665	0.811593	0.052	0.812	1.053	0.687	1.614	0.635886	9.82651e-06	0.676	0	1.966	1.449	2.669
ANXA1_PSORS1C3_HCP5_hsa-miR-181a-5p_hsa-miR-497-5p	0.724242	1.79274e-07	1.13	0	3.096	1.982	4.837	0.557749	0.715019	-0.08	0.714	0.923	0.602	1.415	0.636444	1.06786e-05	0.671	0	1.956	1.443	2.651
ANXA1_PSORS1C3_hsa-miR-193a-5p_hsa-miR-181a-5p_hsa-miR-497-5p	0.705758	2.48076e-05	0.914	0	2.493	1.607	3.869	0.553657	0.358376	-0.201	0.359	0.818	0.532	1.257	0.614171	0.000205807	0.564	0	1.757	1.3	2.376
ANXA1_HCP5_hsa-miR-193a-5p_hsa-miR-181a-5p_hsa-miR-497-5p	0.728788	2.06384e-08	1.227	0	3.412	2.165	5.378	0.574527	0.15818	0.307	0.159	1.359	0.886	2.084	0.644114	5.99315e-07	0.765	0	2.149	1.58	2.924
TPST1_PSMB10_DLEU1_PSORS1C3_HCP5	0.719091	4.43526e-08	1.195	0	3.304	2.104	5.187	0.680614	0.212741	-0.276	0.214	0.759	0.491	1.173	0.665422	4.42494e-05	0.628	0	1.874	1.379	2.545
TPST1_PSMB10_DLEU1_PSORS1C3_hsa-miR-193a-5p	0.721515	1.66823e-08	1.254	0	3.506	2.212	5.555	0.649514	0.230318	-0.266	0.232	0.767	0.496	1.185	0.646425	0.000339768	0.551	0	1.735	1.279	2.355
TPST1_PSMB10_DLEU1_PSORS1C3_hsa-miR-181a-5p	0.70899	1.70238e-07	1.139	0	3.122	1.997	4.882	0.65913	0.0660837	-0.409	0.068	0.664	0.428	1.03	0.655492	2.05839e-05	0.654	0	1.924	1.416	2.614
TPST1_PSMB10_DLEU1_PSORS1C3_hsa-miR-497-5p	0.725354	4.86098e-07	1.099	0	3	1.918	4.694	0.670179	0.0825736	-0.39	0.084	0.677	0.435	1.054	0.670019	4.33152e-06	0.712	0	2.038	1.495	2.78
TPST1_PSMB10_DLEU1_HCP5_hsa-miR-193a-5p	0.723838	4.4119e-08	1.2	0	3.322	2.112	5.225	0.558261	0.964108	0.01	0.965	1.01	0.655	1.556	0.666057	1.12517e-05	0.674	0	1.963	1.444	2.667
TPST1_PSMB10_DLEU1_HCP5_hsa-miR-181a-5p	0.710505	8.77427e-08	1.172	0	3.23	2.058	5.07	0.556419	0.987129	-0.004	0.986	0.996	0.647	1.533	0.687365	5.19919e-08	0.843	0	2.324	1.701	3.177
TPST1_PSMB10_DLEU1_HCP5_hsa-miR-497-5p	0.727071	8.79091e-09	1.272	0	3.57	2.253	5.655	0.554169	0.86437	0.037	0.866	1.037	0.677	1.591	0.688737	1.57213e-07	0.818	0	2.265	1.655	3.101
TPST1_PSMB10_DLEU1_hsa-miR-193a-5p_hsa-miR-181a-5p	0.714343	2.93267e-09	1.326	0	3.767	2.366	5.997	0.460972	0.158972	0.307	0.161	1.36	0.885	2.091	0.676648	7.85053e-07	0.767	0	2.154	1.577	2.942
TPST1_PSMB10_DLEU1_hsa-miR-193a-5p_hsa-miR-497-5p	0.731717	4.96653e-09	1.303	0	3.682	2.315	5.855	0.55867	0.90928	0.025	0.911	1.025	0.664	1.581	0.679441	9.48896e-07	0.757	0	2.132	1.564	2.906
TPST1_PSMB10_DLEU1_hsa-miR-181a-5p_hsa-miR-497-5p	0.720909	4.84533e-09	1.288	0	3.626	2.294	5.732	0.531867	0.558121	0.129	0.56	1.137	0.738	1.753	0.703619	5.84887e-09	0.912	0	2.488	1.811	3.418
TPST1_PSMB10_PSORS1C3_HCP5_hsa-miR-193a-5p	0.716364	1.31467e-07	1.151	0	3.161	2.015	4.958	0.633248	0.281926	-0.239	0.283	0.788	0.51	1.218	0.623111	0.0154912	0.369	0.016	1.446	1.071	1.952
TPST1_PSMB10_PSORS1C3_HCP5_hsa-miR-181a-5p	0.697677	8.85778e-06	0.962	0	2.617	1.686	4.064	0.650128	0.152737	-0.318	0.154	0.728	0.47	1.127	0.634895	0.00010138	0.597	0	1.816	1.338	2.465
TPST1_PSMB10_PSORS1C3_HCP5_hsa-miR-497-5p	0.717273	6.19804e-07	1.078	0	2.939	1.886	4.578	0.649105	0.132301	-0.334	0.134	0.716	0.462	1.108	0.645841	0.000917841	0.507	0.001	1.66	1.226	2.247
TPST1_PSMB10_PSORS1C3_hsa-miR-193a-5p_hsa-miR-181a-5p	0.70697	2.12573e-07	1.138	0	3.119	1.986	4.9	0.625882	0.989846	-0.003	0.988	0.997	0.649	1.532	0.621156	0.00188361	0.475	0.002	1.607	1.188	2.174
TPST1_PSMB10_PSORS1C3_hsa-miR-193a-5p_hsa-miR-497-5p	0.720808	5.57931e-09	1.284	0	3.612	2.279	5.724	0.633964	0.14571	-0.324	0.147	0.723	0.467	1.121	0.632279	0.00154839	0.484	0.002	1.622	1.199	2.196
TPST1_PSMB10_PSORS1C3_hsa-miR-181a-5p_hsa-miR-497-5p	0.702626	2.66175e-05	0.906	0	2.474	1.599	3.828	0.643274	0.131717	-0.335	0.133	0.715	0.462	1.107	0.639086	1.32159e-05	0.669	0	1.952	1.436	2.652
TPST1_PSMB10_HCP5_hsa-miR-193a-5p_hsa-miR-181a-5p	0.706667	8.81537e-07	1.073	0	2.926	1.87	4.577	0.512634	0.791381	0.057	0.793	1.059	0.691	1.622	0.645714	6.32083e-05	0.616	0	1.851	1.362	2.515
TPST1_PSMB10_HCP5_hsa-miR-193a-5p_hsa-miR-497-5p	0.713939	4.85894e-05	0.877	0	2.404	1.553	3.72	0.533095	0.827584	0.047	0.829	1.048	0.683	1.608	0.643149	0.000155483	0.579	0	1.784	1.316	2.419
TPST1_PSMB10_HCP5_hsa-miR-181a-5p_hsa-miR-497-5p	0.697071	1.86107e-06	1.034	0	2.811	1.805	4.378	0.50179	0.350839	0.203	0.352	1.225	0.799	1.878	0.663238	6.65175e-07	0.769	0	2.158	1.582	2.945
TPST1_PSMB10_hsa-miR-193a-5p_hsa-miR-181a-5p_hsa-miR-497-5p	0.703737	3.7543e-08	1.212	0	3.361	2.128	5.307	0.515703	0.663757	0.095	0.665	1.099	0.716	1.687	0.653257	5.67069e-06	0.697	0	2.009	1.477	2.732
TPST1_DLEU1_PSORS1C3_HCP5_hsa-miR-193a-5p	0.71404	7.72533e-07	1.073	0	2.924	1.875	4.562	0.64798	0.104065	-0.367	0.106	0.693	0.444	1.081	0.639441	0.000121277	0.587	0	1.799	1.328	2.437
TPST1_DLEU1_PSORS1C3_HCP5_hsa-miR-181a-5p	0.69596	2.55572e-05	0.907	0	2.476	1.602	3.828	0.658824	0.172893	-0.303	0.174	0.738	0.477	1.144	0.648457	2.10717e-06	0.727	0	2.068	1.522	2.81
TPST1_DLEU1_PSORS1C3_HCP5_hsa-miR-497-5p	0.714646	7.65654e-06	0.973	0	2.647	1.7	4.119	0.666598	0.0565329	-0.428	0.058	0.652	0.419	1.015	0.659454	1.99834e-05	0.656	0	1.927	1.418	2.618
TPST1_DLEU1_PSORS1C3_hsa-miR-193a-5p_hsa-miR-181a-5p	0.675253	0.000198978	0.802	0	2.231	1.446	3.441	0.638363	0.3014	-0.229	0.302	0.795	0.515	1.228	0.625778	0.000199472	0.57	0	1.768	1.304	2.397
TPST1_DLEU1_PSORS1C3_hsa-miR-193a-5p_hsa-miR-497-5p	0.693737	1.11215e-08	1.255	0	3.509	2.223	5.538	0.646547	0.0262472	-0.501	0.028	0.606	0.387	0.947	0.628648	0.00402671	0.44	0.004	1.553	1.148	2.102
TPST1_DLEU1_PSORS1C3_hsa-miR-181a-5p_hsa-miR-497-5p	0.684141	2.95819e-05	0.901	0	2.461	1.592	3.806	0.656164	0.0319448	-0.483	0.034	0.617	0.395	0.963	0.642819	0.00101444	0.503	0.001	1.654	1.221	2.241
TPST1_DLEU1_HCP5_hsa-miR-193a-5p_hsa-miR-181a-5p	0.703434	2.43851e-06	1.02	0	2.773	1.783	4.311	0.524706	0.847741	0.041	0.85	1.042	0.679	1.6	0.655035	4.36422e-07	0.779	0	2.179	1.599	2.97
TPST1_DLEU1_HCP5_hsa-miR-193a-5p_hsa-miR-497-5p	0.719697	4.54434e-06	1	0	2.719	1.744	4.239	0.472225	0.444064	0.167	0.447	1.182	0.768	1.82	0.653156	1.18865e-05	0.671	0	1.957	1.441	2.658
TPST1_DLEU1_HCP5_hsa-miR-181a-5p_hsa-miR-497-5p	0.702323	0.000130335	0.82	0	2.269	1.475	3.492	0.491049	0.976658	0.006	0.979	1.006	0.656	1.543	0.675479	3.02342e-07	0.791	0	2.205	1.617	3.007
TPST1_DLEU1_hsa-miR-193a-5p_hsa-miR-181a-5p_hsa-miR-497-5p	0.692929	1.95158e-07	1.133	0	3.104	1.984	4.855	0.519386	0.492674	-0.151	0.491	0.86	0.56	1.321	0.670806	4.43203e-05	0.633	0	1.883	1.383	2.565
TPST1_PSORS1C3_HCP5_hsa-miR-193a-5p_hsa-miR-181a-5p	0.692323	0.000132331	0.822	0	2.275	1.475	3.507	0.624757	0.170229	-0.305	0.172	0.737	0.476	1.142	0.602717	0.0037956	0.442	0.004	1.555	1.151	2.103
TPST1_PSORS1C3_HCP5_hsa-miR-193a-5p_hsa-miR-497-5p	0.703636	2.27577e-07	1.135	0	3.111	1.98	4.886	0.628542	0.2117	-0.281	0.213	0.755	0.485	1.175	0.616711	0.000817102	0.512	0.001	1.668	1.232	2.258
TPST1_PSORS1C3_HCP5_hsa-miR-181a-5p_hsa-miR-497-5p	0.687778	5.68594e-06	0.976	0	2.654	1.714	4.111	0.642558	0.0700733	-0.406	0.072	0.666	0.428	1.037	0.620673	0.000334774	0.548	0	1.729	1.277	2.341
TPST1_PSORS1C3_hsa-miR-193a-5p_hsa-miR-181a-5p_hsa-miR-497-5p	0.676869	3.54881e-06	1.017	0	2.764	1.767	4.323	0.628338	0.0798499	-0.39	0.082	0.677	0.436	1.05	0.598375	0.00225723	0.465	0.002	1.592	1.178	2.153
TPST1_HCP5_hsa-miR-193a-5p_hsa-miR-181a-5p_hsa-miR-497-5p	0.68899	7.96815e-07	1.067	0	2.907	1.867	4.527	0.530332	0.616964	0.109	0.618	1.115	0.727	1.709	0.622679	0.000170819	0.574	0	1.776	1.311	2.406
PSMB10_DLEU1_PSORS1C3_HCP5_hsa-miR-193a-5p	0.706667	1.21727e-07	1.154	0	3.171	2.025	4.967	0.658721	0.345289	-0.21	0.346	0.811	0.524	1.254	0.60894	0.000485741	0.533	0.001	1.705	1.259	2.308
PSMB10_DLEU1_PSORS1C3_HCP5_hsa-miR-181a-5p	0.694242	8.06717e-09	1.263	0	3.537	2.246	5.571	0.655141	0.322767	-0.219	0.323	0.804	0.521	1.24	0.616279	0.000372791	0.544	0	1.723	1.272	2.333
PSMB10_DLEU1_PSORS1C3_HCP5_hsa-miR-497-5p	0.710101	4.0711e-09	1.284	0	3.613	2.295	5.687	0.670281	0.0864286	-0.385	0.088	0.68	0.437	1.059	0.638806	4.93777e-05	0.621	0	1.861	1.372	2.524
PSMB10_DLEU1_PSORS1C3_hsa-miR-193a-5p_hsa-miR-181a-5p	0.699697	1.09269e-07	1.159	0	3.188	2.034	4.996	0.637954	0.698439	-0.085	0.697	0.918	0.598	1.411	0.601752	0.000381203	0.543	0	1.721	1.271	2.33
PSMB10_DLEU1_PSORS1C3_hsa-miR-193a-5p_hsa-miR-497-5p	0.717071	2.60461e-09	1.331	0	3.785	2.378	6.026	0.657187	0.225376	-0.271	0.226	0.762	0.491	1.183	0.628089	2.1409e-05	0.653	0	1.921	1.414	2.609
PSMB10_DLEU1_PSORS1C3_hsa-miR-181a-5p_hsa-miR-497-5p	0.707071	3.59665e-08	1.214	0	3.367	2.138	5.302	0.650742	0.122963	-0.348	0.124	0.706	0.453	1.101	0.63073	2.64603e-06	0.724	0	2.063	1.515	2.81
PSMB10_DLEU1_HCP5_hsa-miR-193a-5p_hsa-miR-181a-5p	0.699192	1.53963e-07	1.156	0	3.177	2.021	4.995	0.457289	0.134444	0.326	0.137	1.386	0.902	2.13	0.62687	3.95683e-05	0.63	0	1.878	1.384	2.548
PSMB10_DLEU1_HCP5_hsa-miR-193a-5p_hsa-miR-497-5p	0.713535	5.74584e-08	1.197	0	3.311	2.101	5.219	0.572276	0.773635	-0.064	0.772	0.938	0.608	1.447	0.637663	4.46406e-06	0.707	0	2.028	1.49	2.76
PSMB10_DLEU1_HCP5_hsa-miR-181a-5p_hsa-miR-497-5p	0.699394	4.6769e-07	1.103	0	3.013	1.925	4.716	0.51468	0.427192	0.173	0.429	1.188	0.775	1.824	0.655263	4.21308e-07	0.782	0	2.186	1.602	2.981
PSMB10_DLEU1_hsa-miR-193a-5p_hsa-miR-181a-5p_hsa-miR-497-5p	0.711212	1.10632e-07	1.17	0	3.222	2.048	5.068	0.539847	0.586637	0.119	0.589	1.127	0.731	1.736	0.647848	1.4321e-06	0.744	0	2.103	1.544	2.866
PSMB10_PSORS1C3_HCP5_hsa-miR-193a-5p_hsa-miR-181a-5p	0.674848	0.000144597	0.816	0	2.261	1.468	3.484	0.626803	0.868271	-0.037	0.868	0.964	0.626	1.485	0.570438	0.0081099	0.402	0.009	1.495	1.108	2.018
PSMB10_PSORS1C3_HCP5_hsa-miR-193a-5p_hsa-miR-497-5p	0.694949	3.69625e-06	0.996	0	2.709	1.747	4.201	0.639693	0.300253	-0.231	0.301	0.794	0.513	1.229	0.594159	9.78302e-05	0.594	0	1.811	1.338	2.453
PSMB10_PSORS1C3_HCP5_hsa-miR-181a-5p_hsa-miR-497-5p	0.678283	3.32506e-06	1.007	0	2.737	1.76	4.258	0.637954	0.201539	-0.283	0.202	0.753	0.488	1.164	0.597968	0.000967067	0.502	0.001	1.653	1.222	2.234
PSMB10_PSORS1C3_hsa-miR-193a-5p_hsa-miR-181a-5p_hsa-miR-497-5p	0.683333	7.54922e-07	1.072	0	2.92	1.874	4.552	0.628645	0.458891	-0.165	0.458	0.848	0.549	1.31	0.586083	0.0159974	0.366	0.017	1.442	1.069	1.946
PSMB10_HCP5_hsa-miR-193a-5p_hsa-miR-181a-5p_hsa-miR-497-5p	0.672121	6.03278e-07	1.087	0	2.966	1.898	4.635	0.480307	0.534551	0.135	0.537	1.144	0.746	1.754	0.601422	0.000218111	0.565	0	1.759	1.299	2.383
DLEU1_PSORS1C3_HCP5_hsa-miR-193a-5p_hsa-miR-181a-5p	0.669192	3.92815e-05	0.885	0	2.422	1.569	3.739	0.644194	0.266668	-0.248	0.268	0.781	0.504	1.21	0.575263	0.00264383	0.458	0.003	1.58	1.17	2.135
DLEU1_PSORS1C3_HCP5_hsa-miR-193a-5p_hsa-miR-497-5p	0.685859	8.80942e-06	0.951	0	2.588	1.677	3.994	0.658926	0.0621606	-0.426	0.064	0.653	0.416	1.025	0.59713	0.0312798	0.328	0.032	1.388	1.029	1.872
DLEU1_PSORS1C3_HCP5_hsa-miR-181a-5p_hsa-miR-497-5p	0.670404	2.98123e-06	1.008	0	2.74	1.766	4.25	0.653913	0.0319923	-0.484	0.034	0.616	0.394	0.963	0.60734	0.00127815	0.49	0.001	1.633	1.208	2.208
DLEU1_PSORS1C3_hsa-miR-193a-5p_hsa-miR-181a-5p_hsa-miR-497-5p	0.638687	0.00463087	0.606	0.005	1.833	1.198	2.804	0.645729	0.0270935	-0.498	0.029	0.608	0.389	0.949	0.579708	0.00740024	0.408	0.008	1.503	1.113	2.03
DLEU1_HCP5_hsa-miR-193a-5p_hsa-miR-181a-5p_hsa-miR-497-5p	0.671313	6.29676e-06	0.97	0	2.639	1.707	4.081	0.539744	0.971719	0.007	0.975	1.007	0.655	1.549	0.606654	0.00899851	0.397	0.009	1.487	1.102	2.006
PSORS1C3_HCP5_hsa-miR-193a-5p_hsa-miR-181a-5p_hsa-miR-497-5p	0.651818	0.00226426	0.649	0.003	1.914	1.253	2.924	0.629565	0.0944082	-0.371	0.096	0.69	0.446	1.068	0.550806	0.0562644	0.289	0.057	1.336	0.991	1.8
ANXA1_TPST1_PSMB10_DLEU1_PSORS1C3_HCP5	0.755253	6.33962e-10	1.385	0	3.993	2.493	6.395	0.577494	0.858258	-0.039	0.857	0.961	0.626	1.476	0.675225	2.32131e-07	0.798	0	2.221	1.629	3.03
ANXA1_TPST1_PSMB10_DLEU1_PSORS1C3_hsa-miR-193a-5p	0.754343	1.07471e-08	1.273	0	3.57	2.246	5.677	0.565013	0.973375	0.007	0.973	1.008	0.657	1.546	0.65887	1.24442e-05	0.669	0	1.951	1.438	2.648
ANXA1_TPST1_PSMB10_DLEU1_PSORS1C3_hsa-miR-181a-5p	0.747677	2.68934e-08	1.228	0	3.413	2.158	5.397	0.590793	0.838067	-0.045	0.838	0.956	0.623	1.468	0.660597	2.7021e-07	0.787	0	2.198	1.616	2.99
ANXA1_TPST1_PSMB10_DLEU1_PSORS1C3_hsa-miR-497-5p	0.764444	3.75264e-11	1.49	0	4.436	2.749	7.158	0.573299	0.783753	0.059	0.785	1.061	0.693	1.625	0.673702	2.2336e-08	0.866	0	2.378	1.739	3.251
ANXA1_TPST1_PSMB10_DLEU1_HCP5_hsa-miR-193a-5p	0.766364	1.37141e-09	1.349	0	3.854	2.415	6.152	0.540153	0.258188	0.246	0.259	1.279	0.834	1.959	0.683175	2.28193e-07	0.798	0	2.222	1.629	3.031
ANXA1_TPST1_PSMB10_DLEU1_HCP5_hsa-miR-181a-5p	0.752727	9.48724e-09	1.264	0	3.541	2.239	5.6	0.540665	0.361078	0.199	0.362	1.22	0.796	1.872	0.694425	6.41445e-08	0.834	0	2.302	1.687	3.141
ANXA1_TPST1_PSMB10_DLEU1_HCP5_hsa-miR-497-5p	0.773636	1.20726e-12	1.607	0	4.99	3.07	8.112	0.544143	0.42243	0.175	0.423	1.191	0.777	1.827	0.702578	1.08824e-08	0.887	0	2.427	1.773	3.322
ANXA1_TPST1_PSMB10_DLEU1_hsa-miR-193a-5p_hsa-miR-181a-5p	0.751919	3.24982e-10	1.393	0	4.027	2.527	6.417	0.541074	0.286018	0.232	0.287	1.261	0.823	1.933	0.679187	3.79562e-08	0.847	0	2.333	1.71	3.183
ANXA1_TPST1_PSMB10_DLEU1_hsa-miR-193a-5p_hsa-miR-497-5p	0.772525	1.26333e-11	1.531	0	4.623	2.857	7.48	0.538312	0.450718	0.164	0.451	1.178	0.769	1.805	0.686502	2.46351e-08	0.858	0	2.359	1.729	3.219
ANXA1_TPST1_PSMB10_DLEU1_hsa-miR-181a-5p_hsa-miR-497-5p	0.76202	1.29533e-10	1.432	0	4.187	2.619	6.694	0.460358	0.569361	0.123	0.571	1.131	0.739	1.732	0.696508	1.76299e-10	0.988	0	2.685	1.959	3.68
ANXA1_TPST1_PSMB10_PSORS1C3_HCP5_hsa-miR-193a-5p	0.759293	8.06939e-10	1.372	0	3.945	2.463	6.319	0.540153	0.67822	-0.09	0.679	0.914	0.595	1.402	0.656711	0.00025613	0.559	0	1.75	1.291	2.37
ANXA1_TPST1_PSMB10_PSORS1C3_HCP5_hsa-miR-181a-5p	0.748586	2.70518e-07	1.126	0	3.085	1.965	4.842	0.572992	0.600867	-0.115	0.6	0.891	0.58	1.37	0.65699	3.61848e-06	0.71	0	2.033	1.496	2.762
ANXA1_TPST1_PSMB10_PSORS1C3_HCP5_hsa-miR-497-5p	0.767172	1.20598e-07	1.17	0	3.222	2.038	5.092	0.448798	0.536337	0.134	0.537	1.144	0.747	1.752	0.671746	1.30903e-08	0.876	0	2.402	1.759	3.281
ANXA1_TPST1_PSMB10_PSORS1C3_hsa-miR-193a-5p_hsa-miR-181a-5p	0.745152	7.28688e-09	1.286	0	3.617	2.275	5.751	0.557954	0.491364	-0.151	0.492	0.86	0.559	1.323	0.647797	7.00775e-06	0.687	0	1.988	1.465	2.698
ANXA1_TPST1_PSMB10_PSORS1C3_hsa-miR-193a-5p_hsa-miR-497-5p	0.760303	1.00906e-10	1.459	0	4.303	2.663	6.955	0.545473	0.934632	-0.018	0.935	0.982	0.641	1.507	0.657371	5.10403e-07	0.768	0	2.155	1.586	2.929
ANXA1_TPST1_PSMB10_PSORS1C3_hsa-miR-181a-5p_hsa-miR-497-5p	0.753232	7.01485e-09	1.283	0	3.608	2.272	5.73	0.576368	0.569493	-0.124	0.569	0.883	0.575	1.355	0.657625	2.09317e-06	0.724	0	2.064	1.52	2.802
ANXA1_TPST1_PSMB10_HCP5_hsa-miR-193a-5p_hsa-miR-181a-5p	0.750404	2.69363e-09	1.33	0	3.782	2.367	6.043	0.559488	0.315605	0.219	0.316	1.244	0.811	1.909	0.673905	1.27568e-08	0.877	0	2.405	1.761	3.285
ANXA1_TPST1_PSMB10_HCP5_hsa-miR-193a-5p_hsa-miR-497-5p	0.771111	1.34975e-09	1.356	0	3.879	2.422	6.213	0.555396	0.0876576	0.372	0.089	1.451	0.945	2.228	0.679441	6.58323e-08	0.835	0	2.304	1.687	3.146
ANXA1_TPST1_PSMB10_HCP5_hsa-miR-181a-5p_hsa-miR-497-5p	0.756768	2.12408e-07	1.135	0	3.11	1.982	4.881	0.561841	0.249919	0.251	0.251	1.285	0.837	1.973	0.689498	4.42165e-08	0.843	0	2.322	1.702	3.168
ANXA1_TPST1_PSMB10_hsa-miR-193a-5p_hsa-miR-181a-5p_hsa-miR-497-5p	0.757071	1.24615e-09	1.342	0	3.826	2.407	6.081	0.552839	0.616185	0.109	0.616	1.115	0.728	1.708	0.674032	1.51958e-06	0.736	0	2.087	1.536	2.836
ANXA1_TPST1_DLEU1_PSORS1C3_HCP5_hsa-miR-193a-5p	0.748283	3.60183e-08	1.231	0	3.425	2.152	5.451	0.551918	0.829575	-0.047	0.829	0.954	0.621	1.464	0.661079	6.75874e-05	0.612	0	1.844	1.358	2.503
ANXA1_TPST1_DLEU1_PSORS1C3_HCP5_hsa-miR-181a-5p	0.731515	2.09182e-06	1.034	0	2.812	1.801	4.389	0.577289	0.786671	0.059	0.788	1.06	0.692	1.624	0.6656	0.000280109	0.555	0	1.741	1.286	2.357
ANXA1_TPST1_DLEU1_PSORS1C3_HCP5_hsa-miR-497-5p	0.755859	1.05718e-07	1.172	0	3.227	2.047	5.089	0.56532	0.927814	0.019	0.929	1.02	0.665	1.562	0.68061	3.29581e-06	0.714	0	2.042	1.502	2.776
ANXA1_TPST1_DLEU1_PSORS1C3_hsa-miR-193a-5p_hsa-miR-181a-5p	0.710101	2.6688e-05	0.912	0	2.49	1.604	3.866	0.562251	0.76922	-0.064	0.77	0.938	0.61	1.441	0.64061	0.000531602	0.527	0.001	1.694	1.253	2.29
ANXA1_TPST1_DLEU1_PSORS1C3_hsa-miR-193a-5p_hsa-miR-497-5p	0.739495	1.39238e-07	1.154	0	3.172	2.018	4.985	0.548747	0.806212	-0.053	0.806	0.948	0.618	1.453	0.65506	8.23581e-07	0.756	0	2.129	1.565	2.895
ANXA1_TPST1_DLEU1_PSORS1C3_hsa-miR-181a-5p_hsa-miR-497-5p	0.72303	2.56239e-06	1.019	0	2.771	1.78	4.312	0.574322	0.694363	-0.086	0.694	0.917	0.597	1.409	0.654197	3.8691e-07	0.775	0	2.171	1.598	2.951
ANXA1_TPST1_DLEU1_HCP5_hsa-miR-193a-5p_hsa-miR-181a-5p	0.746869	1.84233e-07	1.151	0	3.162	2.005	4.986	0.560512	0.0457316	0.435	0.047	1.545	1.005	2.375	0.675556	1.64383e-06	0.735	0	2.086	1.534	2.837
ANXA1_TPST1_DLEU1_HCP5_hsa-miR-193a-5p_hsa-miR-497-5p	0.765556	7.16143e-09	1.278	0	3.59	2.264	5.692	0.558875	0.0523821	0.423	0.054	1.526	0.993	2.346	0.682768	4.82108e-07	0.775	0	2.171	1.593	2.958
ANXA1_TPST1_DLEU1_HCP5_hsa-miR-181a-5p_hsa-miR-497-5p	0.751111	2.22254e-07	1.135	0	3.113	1.982	4.889	0.562762	0.608205	0.111	0.608	1.118	0.73	1.712	0.69633	3.20209e-08	0.854	0	2.349	1.72	3.208
ANXA1_TPST1_DLEU1_hsa-miR-193a-5p_hsa-miR-181a-5p_hsa-miR-497-5p	0.735051	1.34378e-08	1.25	0	3.491	2.211	5.511	0.561739	0.168192	0.3	0.17	1.349	0.88	2.069	0.673117	1.22415e-05	0.668	0	1.95	1.438	2.644
ANXA1_TPST1_PSORS1C3_HCP5_hsa-miR-193a-5p_hsa-miR-181a-5p	0.744545	1.2587e-08	1.27	0	3.561	2.235	5.672	0.536368	0.415483	-0.178	0.416	0.837	0.545	1.285	0.64706	7.35609e-05	0.607	0	1.835	1.353	2.488
ANXA1_TPST1_PSORS1C3_HCP5_hsa-miR-193a-5p_hsa-miR-497-5p	0.757172	4.34665e-09	1.299	0	3.665	2.305	5.826	0.526854	0.6855	0.088	0.686	1.092	0.713	1.672	0.659708	1.17029e-06	0.743	0	2.102	1.547	2.855
ANXA1_TPST1_PSORS1C3_HCP5_hsa-miR-181a-5p_hsa-miR-497-5p	0.749192	1.47194e-08	1.247	0	3.48	2.2	5.506	0.556215	0.715019	-0.08	0.714	0.923	0.602	1.415	0.663162	1.26652e-06	0.745	0	2.106	1.547	2.866
ANXA1_TPST1_PSORS1C3_hsa-miR-193a-5p_hsa-miR-181a-5p_hsa-miR-497-5p	0.723535	1.22333e-05	0.941	0	2.563	1.655	3.969	0.540972	0.546409	-0.132	0.546	0.877	0.571	1.345	0.639238	9.4871e-06	0.675	0	1.963	1.449	2.662
ANXA1_TPST1_HCP5_hsa-miR-193a-5p_hsa-miR-181a-5p_hsa-miR-497-5p	0.754949	3.328e-09	1.32	0	3.743	2.342	5.983	0.586803	0.10084	0.357	0.102	1.429	0.931	2.194	0.670781	2.76102e-07	0.788	0	2.2	1.616	2.994
ANXA1_PSMB10_DLEU1_PSORS1C3_HCP5_hsa-miR-193a-5p	0.752828	6.71996e-11	1.467	0	4.338	2.693	6.988	0.571867	0.801936	0.055	0.801	1.057	0.689	1.621	0.643505	5.18909e-06	0.695	0	2.004	1.477	2.719
ANXA1_PSMB10_DLEU1_PSORS1C3_HCP5_hsa-miR-181a-5p	0.741818	1.75039e-11	1.507	0	4.515	2.802	7.275	0.584859	0.545748	-0.133	0.545	0.876	0.57	1.346	0.64546	8.40335e-06	0.68	0	1.974	1.455	2.679
ANXA1_PSMB10_DLEU1_PSORS1C3_HCP5_hsa-miR-497-5p	0.759394	1.7102e-09	1.334	0	3.796	2.384	6.045	0.572583	0.783753	0.059	0.785	1.061	0.693	1.625	0.663771	9.06134e-08	0.827	0	2.286	1.674	3.122
ANXA1_PSMB10_DLEU1_PSORS1C3_hsa-miR-193a-5p_hsa-miR-181a-5p	0.742121	1.42714e-10	1.432	0	4.187	2.613	6.708	0.579028	0.786275	-0.06	0.787	0.942	0.612	1.45	0.634032	0.000145726	0.578	0	1.782	1.317	2.411
ANXA1_PSMB10_DLEU1_PSORS1C3_hsa-miR-193a-5p_hsa-miR-497-5p	0.762323	9.42246e-12	1.54	0	4.663	2.877	7.558	0.569514	0.793211	0.057	0.793	1.059	0.691	1.622	0.64739	1.07401e-05	0.672	0	1.959	1.444	2.656
ANXA1_PSMB10_DLEU1_PSORS1C3_hsa-miR-181a-5p_hsa-miR-497-5p	0.749899	6.41769e-09	1.282	0	3.602	2.275	5.705	0.583223	0.625998	-0.107	0.626	0.899	0.585	1.381	0.647187	9.85417e-06	0.675	0	1.964	1.448	2.664
ANXA1_PSMB10_DLEU1_HCP5_hsa-miR-193a-5p_hsa-miR-181a-5p	0.746667	6.28834e-11	1.459	0	4.301	2.682	6.897	0.535754	0.237041	0.257	0.238	1.293	0.844	1.982	0.660013	1.67853e-07	0.801	0	2.229	1.638	3.033
ANXA1_PSMB10_DLEU1_HCP5_hsa-miR-193a-5p_hsa-miR-497-5p	0.767374	8.60823e-12	1.541	0	4.669	2.882	7.564	0.46844	0.934715	0.018	0.935	1.018	0.664	1.56	0.66659	8.18828e-08	0.822	0	2.276	1.671	3.099
ANXA1_PSMB10_DLEU1_HCP5_hsa-miR-181a-5p_hsa-miR-497-5p	0.757778	5.14822e-12	1.551	0	4.718	2.921	7.62	0.55202	0.288624	0.232	0.29	1.261	0.821	1.936	0.679365	1.52438e-08	0.871	0	2.389	1.75	3.26
ANXA1_PSMB10_DLEU1_hsa-miR-193a-5p_hsa-miR-181a-5p_hsa-miR-497-5p	0.756162	9.16378e-13	1.624	0	5.074	3.107	8.286	0.463836	0.868568	0.036	0.87	1.036	0.676	1.588	0.666006	5.86525e-07	0.767	0	2.153	1.582	2.93
ANXA1_PSMB10_PSORS1C3_HCP5_hsa-miR-193a-5p_hsa-miR-181a-5p	0.738384	1.78577e-10	1.424	0	4.155	2.594	6.656	0.562353	0.504129	-0.147	0.505	0.864	0.561	1.329	0.628546	2.07423e-05	0.648	0	1.912	1.411	2.589
ANXA1_PSMB10_PSORS1C3_HCP5_hsa-miR-193a-5p_hsa-miR-497-5p	0.755455	6.87916e-08	1.193	0	3.297	2.084	5.215	0.553657	0.714402	-0.08	0.715	0.923	0.602	1.417	0.643454	4.21051e-06	0.705	0	2.024	1.49	2.75
ANXA1_PSMB10_PSORS1C3_HCP5_hsa-miR-181a-5p_hsa-miR-497-5p	0.748182	2.448e-09	1.321	0	3.747	2.357	5.955	0.570742	0.457155	-0.163	0.457	0.85	0.553	1.305	0.642032	1.38605e-05	0.664	0	1.942	1.432	2.633
ANXA1_PSMB10_PSORS1C3_hsa-miR-193a-5p_hsa-miR-181a-5p_hsa-miR-497-5p	0.746566	1.24727e-08	1.262	0	3.533	2.226	5.609	0.562967	0.337516	-0.21	0.339	0.811	0.528	1.246	0.633346	3.19181e-05	0.633	0	1.884	1.391	2.551
ANXA1_PSMB10_HCP5_hsa-miR-193a-5p_hsa-miR-181a-5p_hsa-miR-497-5p	0.748788	3.31425e-07	1.114	0	3.046	1.944	4.774	0.452276	0.712215	0.08	0.713	1.083	0.707	1.66	0.655771	2.5357e-06	0.723	0	2.06	1.515	2.801
ANXA1_DLEU1_PSORS1C3_HCP5_hsa-miR-193a-5p_hsa-miR-181a-5p	0.721515	3.14743e-08	1.219	0	3.383	2.143	5.343	0.569616	0.79797	-0.056	0.797	0.945	0.616	1.451	0.629333	0.00112131	0.495	0.001	1.64	1.214	2.216
ANXA1_DLEU1_PSORS1C3_HCP5_hsa-miR-193a-5p_hsa-miR-497-5p	0.743232	5.85894e-08	1.205	0	3.337	2.105	5.29	0.56133	0.589086	0.117	0.59	1.125	0.734	1.723	0.646857	8.03644e-06	0.68	0	1.974	1.456	2.676
ANXA1_DLEU1_PSORS1C3_HCP5_hsa-miR-181a-5p_hsa-miR-497-5p	0.72899	1.63492e-07	1.146	0	3.146	2.004	4.94	0.574322	0.819591	-0.05	0.818	0.951	0.62	1.459	0.650286	1.48139e-06	0.737	0	2.09	1.538	2.84
ANXA1_DLEU1_PSORS1C3_hsa-miR-193a-5p_hsa-miR-181a-5p_hsa-miR-497-5p	0.715354	8.30186e-06	0.959	0	2.609	1.685	4.041	0.568491	0.461555	-0.162	0.461	0.85	0.553	1.309	0.626997	0.000133304	0.582	0	1.789	1.322	2.421
ANXA1_DLEU1_HCP5_hsa-miR-193a-5p_hsa-miR-181a-5p_hsa-miR-497-5p	0.742323	1.73089e-09	1.339	0	3.814	2.392	6.081	0.552737	0.0977737	0.36	0.099	1.434	0.934	2.201	0.657625	8.79613e-07	0.75	0	2.118	1.56	2.876
ANXA1_PSORS1C3_HCP5_hsa-miR-193a-5p_hsa-miR-181a-5p_hsa-miR-497-5p	0.730909	5.05942e-08	1.193	0	3.296	2.094	5.189	0.544246	0.930872	-0.019	0.93	0.981	0.64	1.503	0.630349	3.05969e-06	0.711	0	2.035	1.501	2.76
TPST1_PSMB10_DLEU1_PSORS1C3_HCP5_hsa-miR-193a-5p	0.725354	1.48913e-08	1.249	0	3.485	2.207	5.505	0.649309	0.303997	-0.229	0.305	0.796	0.514	1.231	0.651251	0.000823774	0.51	0.001	1.666	1.231	2.253
TPST1_PSMB10_DLEU1_PSORS1C3_HCP5_hsa-miR-181a-5p	0.712424	1.02384e-08	1.257	0	3.515	2.232	5.535	0.658926	0.322767	-0.219	0.323	0.804	0.521	1.24	0.659581	7.15691e-06	0.693	0	2	1.469	2.723
TPST1_PSMB10_DLEU1_PSORS1C3_HCP5_hsa-miR-497-5p	0.726869	1.66228e-08	1.245	0	3.473	2.196	5.492	0.669668	0.0864286	-0.385	0.088	0.68	0.437	1.059	0.672686	1.88905e-07	0.81	0	2.248	1.644	3.074
TPST1_PSMB10_DLEU1_PSORS1C3_hsa-miR-193a-5p_hsa-miR-181a-5p	0.717778	1.68279e-08	1.258	0	3.517	2.218	5.578	0.636726	0.698439	-0.085	0.697	0.918	0.598	1.411	0.64447	3.42517e-06	0.718	0	2.05	1.504	2.794
TPST1_PSMB10_DLEU1_PSORS1C3_hsa-miR-193a-5p_hsa-miR-497-5p	0.732222	7.79621e-10	1.374	0	3.953	2.474	6.314	0.651458	0.108274	-0.363	0.11	0.696	0.446	1.086	0.65986	1.36647e-05	0.671	0	1.957	1.438	2.663
TPST1_PSMB10_DLEU1_PSORS1C3_hsa-miR-181a-5p_hsa-miR-497-5p	0.722828	1.92033e-08	1.229	0	3.418	2.173	5.375	0.653708	0.128221	-0.343	0.13	0.709	0.455	1.106	0.66494	4.8411e-07	0.783	0	2.189	1.601	2.993
TPST1_PSMB10_DLEU1_HCP5_hsa-miR-193a-5p_hsa-miR-181a-5p	0.717374	2.93267e-09	1.326	0	3.767	2.366	5.997	0.461688	0.158972	0.307	0.161	1.36	0.885	2.091	0.673092	8.67375e-07	0.76	0	2.138	1.568	2.914
TPST1_PSMB10_DLEU1_HCP5_hsa-miR-193a-5p_hsa-miR-497-5p	0.734141	5.67355e-09	1.29	0	3.634	2.294	5.758	0.558465	0.90928	0.025	0.911	1.025	0.664	1.581	0.676063	3.16327e-07	0.792	0	2.208	1.617	3.015
TPST1_PSMB10_DLEU1_HCP5_hsa-miR-181a-5p_hsa-miR-497-5p	0.723434	1.01879e-09	1.366	0	3.92	2.457	6.255	0.530742	0.970881	-0.008	0.969	0.992	0.645	1.523	0.694425	1.22104e-09	0.955	0	2.597	1.887	3.575
TPST1_PSMB10_DLEU1_hsa-miR-193a-5p_hsa-miR-181a-5p_hsa-miR-497-5p	0.726364	2.07351e-10	1.438	0	4.211	2.618	6.774	0.539437	0.586637	0.119	0.589	1.127	0.731	1.736	0.687771	4.54968e-07	0.783	0	2.188	1.601	2.989
TPST1_PSMB10_PSORS1C3_HCP5_hsa-miR-193a-5p_hsa-miR-181a-5p	0.709192	1.00215e-07	1.167	0	3.212	2.043	5.048	0.623939	0.90266	0.027	0.904	1.027	0.667	1.581	0.623086	0.00332166	0.45	0.004	1.568	1.158	2.122
TPST1_PSMB10_PSORS1C3_HCP5_hsa-miR-193a-5p_hsa-miR-497-5p	0.72697	5.45122e-09	1.275	0	3.58	2.269	5.65	0.631304	0.272535	-0.244	0.273	0.783	0.506	1.212	0.635429	0.000183868	0.573	0	1.774	1.308	2.405
TPST1_PSMB10_PSORS1C3_HCP5_hsa-miR-181a-5p_hsa-miR-497-5p	0.70798	3.838e-07	1.093	0	2.984	1.919	4.641	0.64266	0.201539	-0.283	0.202	0.753	0.488	1.164	0.6384	1.87317e-05	0.659	0	1.932	1.421	2.627
TPST1_PSMB10_PSORS1C3_hsa-miR-193a-5p_hsa-miR-181a-5p_hsa-miR-497-5p	0.712525	4.02419e-07	1.103	0	3.013	1.928	4.708	0.628747	0.458891	-0.165	0.458	0.848	0.549	1.31	0.628165	0.000398715	0.543	0	1.721	1.269	2.333
TPST1_PSMB10_HCP5_hsa-miR-193a-5p_hsa-miR-181a-5p_hsa-miR-497-5p	0.707172	3.45367e-07	1.112	0	3.04	1.942	4.76	0.481841	0.378189	0.191	0.38	1.211	0.79	1.857	0.648711	2.58998e-05	0.648	0	1.912	1.406	2.599
TPST1_DLEU1_PSORS1C3_HCP5_hsa-miR-193a-5p_hsa-miR-181a-5p	0.706465	4.75629e-07	1.093	0	2.983	1.911	4.656	0.637238	0.233913	-0.265	0.235	0.767	0.495	1.188	0.637994	4.31948e-06	0.703	0	2.02	1.487	2.742
TPST1_DLEU1_PSORS1C3_HCP5_hsa-miR-193a-5p_hsa-miR-497-5p	0.725051	2.56488e-06	1.021	0	2.775	1.782	4.322	0.648082	0.098455	-0.375	0.1	0.687	0.439	1.075	0.64767	4.69189e-05	0.624	0	1.867	1.376	2.535
TPST1_DLEU1_PSORS1C3_HCP5_hsa-miR-181a-5p_hsa-miR-497-5p	0.710606	6.88358e-07	1.084	0	2.955	1.889	4.623	0.654629	0.0319923	-0.484	0.034	0.616	0.394	0.963	0.655873	8.06637e-07	0.758	0	2.134	1.568	2.904
TPST1_DLEU1_PSORS1C3_hsa-miR-193a-5p_hsa-miR-181a-5p_hsa-miR-497-5p	0.692727	1.95158e-07	1.133	0	3.104	1.984	4.855	0.639898	0.0457824	-0.447	0.048	0.639	0.411	0.995	0.63294	0.00206923	0.472	0.002	1.604	1.184	2.172
TPST1_DLEU1_HCP5_hsa-miR-193a-5p_hsa-miR-181a-5p_hsa-miR-497-5p	0.717576	4.72685e-06	0.994	0	2.702	1.736	4.205	0.481535	0.380347	0.191	0.383	1.211	0.788	1.861	0.662832	1.36583e-06	0.749	0	2.114	1.549	2.885
TPST1_PSORS1C3_HCP5_hsa-miR-193a-5p_hsa-miR-181a-5p_hsa-miR-497-5p	0.698586	1.53526e-05	0.932	0	2.54	1.641	3.933	0.623529	0.086725	-0.383	0.088	0.682	0.439	1.059	0.611937	0.000322445	0.549	0	1.731	1.279	2.344
PSMB10_DLEU1_PSORS1C3_HCP5_hsa-miR-193a-5p_hsa-miR-181a-5p	0.702929	1.98591e-08	1.234	0	3.435	2.18	5.413	0.637442	0.639986	-0.104	0.64	0.902	0.584	1.391	0.604851	0.000444928	0.537	0.001	1.71	1.263	2.315
PSMB10_DLEU1_PSORS1C3_HCP5_hsa-miR-193a-5p_hsa-miR-497-5p	0.718687	3.26196e-09	1.298	0	3.663	2.32	5.784	0.653811	0.1498	-0.323	0.151	0.724	0.466	1.125	0.629511	1.66179e-05	0.661	0	1.937	1.426	2.631
PSMB10_DLEU1_PSORS1C3_HCP5_hsa-miR-181a-5p_hsa-miR-497-5p	0.707677	1.75368e-08	1.237	0	3.447	2.188	5.429	0.645627	0.0980871	-0.369	0.1	0.691	0.445	1.073	0.633244	5.31858e-06	0.702	0	2.017	1.482	2.745
PSMB10_DLEU1_PSORS1C3_hsa-miR-193a-5p_hsa-miR-181a-5p_hsa-miR-497-5p	0.713636	3.71179e-08	1.204	0	3.333	2.123	5.233	0.634578	0.246167	-0.258	0.247	0.772	0.499	1.196	0.617803	4.2752e-06	0.709	0	2.033	1.493	2.768
PSMB10_DLEU1_HCP5_hsa-miR-193a-5p_hsa-miR-181a-5p_hsa-miR-497-5p	0.710909	5.98257e-08	1.191	0	3.292	2.093	5.177	0.540972	0.807329	0.053	0.81	1.055	0.684	1.626	0.643556	3.94779e-05	0.632	0	1.881	1.385	2.555
PSMB10_PSORS1C3_HCP5_hsa-miR-193a-5p_hsa-miR-181a-5p_hsa-miR-497-5p	0.686465	6.58425e-06	0.973	0	2.645	1.705	4.103	0.626701	0.515508	-0.144	0.514	0.866	0.562	1.335	0.588495	0.00310221	0.45	0.003	1.569	1.161	2.12
DLEU1_PSORS1C3_HCP5_hsa-miR-193a-5p_hsa-miR-181a-5p_hsa-miR-497-5p	0.682929	8.2381e-06	0.957	0	2.603	1.685	4.021	0.642762	0.113589	-0.356	0.115	0.7	0.449	1.091	0.595911	0.00767831	0.405	0.008	1.499	1.111	2.023
ANXA1_TPST1_PSMB10_DLEU1_PSORS1C3_HCP5_hsa-miR-193a-5p	0.763232	5.1995e-08	1.207	0	3.344	2.113	5.293	0.56532	0.875212	-0.034	0.876	0.966	0.629	1.484	0.665346	1.17454e-05	0.672	0	1.959	1.442	2.661
ANXA1_TPST1_PSMB10_DLEU1_PSORS1C3_HCP5_hsa-miR-181a-5p	0.749697	6.05059e-10	1.383	0	3.989	2.492	6.384	0.588542	0.660083	-0.097	0.659	0.908	0.591	1.395	0.669486	8.3235e-07	0.755	0	2.128	1.565	2.894
ANXA1_TPST1_PSMB10_DLEU1_PSORS1C3_HCP5_hsa-miR-497-5p	0.767172	4.74601e-10	1.397	0	4.045	2.519	6.494	0.573606	0.783753	0.059	0.785	1.061	0.693	1.625	0.683556	1.67138e-07	0.807	0	2.242	1.643	3.058
ANXA1_TPST1_PSMB10_DLEU1_PSORS1C3_hsa-miR-193a-5p_hsa-miR-181a-5p	0.749495	7.48887e-09	1.286	0	3.618	2.275	5.755	0.577084	0.786275	-0.06	0.787	0.942	0.612	1.45	0.655695	4.33357e-06	0.702	0	2.017	1.486	2.737
ANXA1_TPST1_PSMB10_DLEU1_PSORS1C3_hsa-miR-193a-5p_hsa-miR-497-5p	0.768081	2.21931e-11	1.51	0	4.525	2.801	7.309	0.564604	0.961843	-0.01	0.962	0.99	0.646	1.516	0.666311	1.24145e-06	0.742	0	2.1	1.545	2.854
ANXA1_TPST1_PSMB10_DLEU1_PSORS1C3_hsa-miR-181a-5p_hsa-miR-497-5p	0.758081	1.11392e-10	1.44	0	4.221	2.633	6.766	0.591304	0.744548	-0.072	0.744	0.931	0.606	1.431	0.667606	4.36667e-07	0.774	0	2.168	1.594	2.949
ANXA1_TPST1_PSMB10_DLEU1_HCP5_hsa-miR-193a-5p_hsa-miR-181a-5p	0.754242	2.18312e-09	1.334	0	3.796	2.382	6.052	0.540051	0.237041	0.257	0.238	1.293	0.844	1.982	0.68353	3.86191e-08	0.847	0	2.332	1.709	3.182
ANXA1_TPST1_PSMB10_DLEU1_HCP5_hsa-miR-193a-5p_hsa-miR-497-5p	0.779899	7.48298e-11	1.459	0	4.3	2.674	6.915	0.461688	0.71939	0.078	0.72	1.081	0.706	1.656	0.690641	3.41037e-07	0.785	0	2.193	1.609	2.989
ANXA1_TPST1_PSMB10_DLEU1_HCP5_hsa-miR-181a-5p_hsa-miR-497-5p	0.767374	1.29533e-10	1.432	0	4.187	2.619	6.694	0.459949	0.726743	0.076	0.727	1.079	0.704	1.654	0.702425	2.24313e-08	0.861	0	2.365	1.733	3.228
ANXA1_TPST1_PSMB10_DLEU1_hsa-miR-193a-5p_hsa-miR-181a-5p_hsa-miR-497-5p	0.763636	1.34811e-11	1.522	0	4.584	2.839	7.401	0.465166	0.86491	0.037	0.866	1.037	0.677	1.59	0.68607	2.12141e-08	0.86	0	2.363	1.733	3.222
ANXA1_TPST1_PSMB10_PSORS1C3_HCP5_hsa-miR-193a-5p_hsa-miR-181a-5p	0.751919	2.45662e-08	1.228	0	3.413	2.161	5.39	0.558772	0.650591	-0.099	0.651	0.906	0.589	1.392	0.652648	4.64832e-06	0.702	0	2.018	1.485	2.741
ANXA1_TPST1_PSMB10_PSORS1C3_HCP5_hsa-miR-193a-5p_hsa-miR-497-5p	0.771515	1.67786e-07	1.146	0	3.146	2	4.946	0.545678	0.934632	-0.018	0.935	0.982	0.641	1.507	0.664838	9.70783e-07	0.75	0	2.118	1.558	2.879
ANXA1_TPST1_PSMB10_PSORS1C3_HCP5_hsa-miR-181a-5p_hsa-miR-497-5p	0.758081	2.63729e-08	1.228	0	3.415	2.16	5.399	0.577494	0.457155	-0.163	0.457	0.85	0.553	1.305	0.665956	6.06954e-07	0.765	0	2.148	1.579	2.921
ANXA1_TPST1_PSMB10_PSORS1C3_hsa-miR-193a-5p_hsa-miR-181a-5p_hsa-miR-497-5p	0.756566	5.27549e-10	1.381	0	3.979	2.491	6.356	0.563171	0.304075	-0.225	0.305	0.799	0.52	1.227	0.653562	5.20768e-07	0.769	0	2.158	1.586	2.935
ANXA1_TPST1_PSMB10_HCP5_hsa-miR-193a-5p_hsa-miR-181a-5p_hsa-miR-497-5p	0.760606	5.57972e-08	1.185	0	3.271	2.083	5.136	0.451458	0.712215	0.08	0.713	1.083	0.707	1.66	0.67906	6.20513e-07	0.766	0	2.15	1.58	2.926
ANXA1_TPST1_DLEU1_PSORS1C3_HCP5_hsa-miR-193a-5p_hsa-miR-181a-5p	0.74404	4.63949e-07	1.106	0	3.022	1.925	4.743	0.563478	0.914766	-0.024	0.914	0.977	0.636	1.499	0.657549	8.16265e-05	0.602	0	1.826	1.347	2.474
ANXA1_TPST1_DLEU1_PSORS1C3_HCP5_hsa-miR-193a-5p_hsa-miR-497-5p	0.764545	4.25491e-07	1.11	0	3.033	1.932	4.762	0.551304	0.915097	0.023	0.916	1.023	0.667	1.569	0.670578	1.79025e-06	0.735	0	2.085	1.532	2.838
ANXA1_TPST1_DLEU1_PSORS1C3_HCP5_hsa-miR-181a-5p_hsa-miR-497-5p	0.748687	1.39295e-06	1.047	0	2.85	1.829	4.441	0.574834	0.819591	-0.05	0.818	0.951	0.62	1.459	0.67487	2.67206e-06	0.721	0	2.057	1.512	2.798
ANXA1_TPST1_DLEU1_PSORS1C3_hsa-miR-193a-5p_hsa-miR-181a-5p_hsa-miR-497-5p	0.733737	2.93366e-07	1.116	0	3.053	1.953	4.774	0.559898	0.706663	-0.082	0.706	0.921	0.6	1.413	0.65087	4.80449e-06	0.696	0	2.006	1.48	2.72
ANXA1_TPST1_DLEU1_HCP5_hsa-miR-193a-5p_hsa-miR-181a-5p_hsa-miR-497-5p	0.763333	2.27321e-08	1.233	0	3.433	2.172	5.426	0.560409	0.0942669	0.364	0.096	1.439	0.938	2.21	0.685029	3.1173e-06	0.714	0	2.043	1.504	2.776
ANXA1_TPST1_PSORS1C3_HCP5_hsa-miR-193a-5p_hsa-miR-181a-5p_hsa-miR-497-5p	0.756263	7.57365e-08	1.178	0	3.247	2.063	5.11	0.537596	0.619667	-0.109	0.619	0.897	0.585	1.377	0.655721	2.63544e-06	0.721	0	2.056	1.512	2.796
ANXA1_PSMB10_DLEU1_PSORS1C3_HCP5_hsa-miR-193a-5p_hsa-miR-181a-5p	0.74596	8.25707e-11	1.453	0	4.274	2.664	6.856	0.578517	0.671229	-0.093	0.672	0.911	0.592	1.402	0.639441	6.18536e-06	0.692	0	1.997	1.471	2.712
ANXA1_PSMB10_DLEU1_PSORS1C3_HCP5_hsa-miR-193a-5p_hsa-miR-497-5p	0.765354	5.99658e-11	1.462	0	4.313	2.684	6.929	0.566445	0.809953	0.053	0.81	1.054	0.687	1.617	0.652444	6.28823e-05	0.611	0	1.843	1.36	2.498
ANXA1_PSMB10_DLEU1_PSORS1C3_HCP5_hsa-miR-181a-5p_hsa-miR-497-5p	0.753636	3.47012e-10	1.394	0	4.029	2.523	6.434	0.583632	0.625998	-0.107	0.626	0.899	0.585	1.381	0.654959	3.74755e-06	0.709	0	2.031	1.495	2.76
ANXA1_PSMB10_DLEU1_PSORS1C3_hsa-miR-193a-5p_hsa-miR-181a-5p_hsa-miR-497-5p	0.75596	6.58951e-11	1.468	0	4.342	2.695	6.995	0.578619	0.633842	-0.105	0.633	0.901	0.586	1.384	0.643022	6.66853e-05	0.608	0	1.837	1.356	2.489
ANXA1_PSMB10_DLEU1_HCP5_hsa-miR-193a-5p_hsa-miR-181a-5p_hsa-miR-497-5p	0.762929	4.21851e-12	1.564	0	4.78	2.947	7.751	0.465166	0.652233	-0.099	0.652	0.906	0.591	1.39	0.667352	5.42328e-07	0.766	0	2.152	1.583	2.925
ANXA1_PSMB10_PSORS1C3_HCP5_hsa-miR-193a-5p_hsa-miR-181a-5p_hsa-miR-497-5p	0.750303	9.66902e-09	1.263	0	3.536	2.236	5.591	0.563581	0.217917	-0.27	0.219	0.763	0.496	1.175	0.638248	1.55296e-06	0.735	0	2.086	1.535	2.835
ANXA1_DLEU1_PSORS1C3_HCP5_hsa-miR-193a-5p_hsa-miR-181a-5p_hsa-miR-497-5p	0.741616	1.26819e-08	1.26	0	3.526	2.223	5.592	0.564399	0.899924	0.027	0.901	1.028	0.671	1.574	0.642895	5.43812e-06	0.693	0	1.999	1.475	2.711
TPST1_PSMB10_DLEU1_PSORS1C3_HCP5_hsa-miR-193a-5p_hsa-miR-181a-5p	0.719899	4.09393e-09	1.301	0	3.672	2.318	5.816	0.63734	0.639986	-0.104	0.64	0.902	0.584	1.391	0.650565	6.02913e-06	0.697	0	2.007	1.475	2.731
TPST1_PSMB10_DLEU1_PSORS1C3_HCP5_hsa-miR-193a-5p_hsa-miR-497-5p	0.736061	8.3654e-10	1.364	0	3.912	2.458	6.226	0.649105	0.0584141	-0.425	0.06	0.653	0.419	1.018	0.66334	5.2172e-07	0.776	0	2.172	1.592	2.964
TPST1_PSMB10_DLEU1_PSORS1C3_HCP5_hsa-miR-181a-5p_hsa-miR-497-5p	0.724949	1.73308e-08	1.241	0	3.46	2.192	5.461	0.652276	0.061071	-0.42	0.063	0.657	0.422	1.023	0.667708	4.31722e-07	0.783	0	2.188	1.603	2.987
TPST1_PSMB10_DLEU1_PSORS1C3_hsa-miR-193a-5p_hsa-miR-181a-5p_hsa-miR-497-5p	0.727475	3.99235e-10	1.403	0	4.066	2.54	6.509	0.635806	0.243672	-0.26	0.244	0.771	0.498	1.194	0.657117	6.82052e-06	0.694	0	2.001	1.47	2.724
TPST1_PSMB10_DLEU1_HCP5_hsa-miR-193a-5p_hsa-miR-181a-5p_hsa-miR-497-5p	0.73	8.07244e-11	1.467	0	4.335	2.695	6.973	0.539949	0.807329	0.053	0.81	1.055	0.684	1.626	0.681803	2.11136e-07	0.809	0	2.245	1.64	3.071
TPST1_PSMB10_PSORS1C3_HCP5_hsa-miR-193a-5p_hsa-miR-181a-5p_hsa-miR-497-5p	0.717071	2.57321e-08	1.211	0	3.358	2.141	5.269	0.62711	0.515508	-0.144	0.514	0.866	0.562	1.335	0.629994	0.000220644	0.567	0	1.764	1.3	2.393
TPST1_DLEU1_PSORS1C3_HCP5_hsa-miR-193a-5p_hsa-miR-181a-5p_hsa-miR-497-5p	0.721212	9.30997e-06	0.964	0	2.621	1.685	4.078	0.638056	0.112169	-0.358	0.114	0.699	0.449	1.09	0.647568	1.21231e-06	0.746	0	2.108	1.549	2.869
PSMB10_DLEU1_PSORS1C3_HCP5_hsa-miR-193a-5p_hsa-miR-181a-5p_hsa-miR-497-5p	0.716869	1.08973e-08	1.252	0	3.498	2.222	5.509	0.633453	0.32848	-0.217	0.329	0.805	0.521	1.244	0.623213	6.8803e-06	0.691	0	1.997	1.469	2.714
ANXA1_TPST1_PSMB10_DLEU1_PSORS1C3_HCP5_hsa-miR-193a-5p_hsa-miR-181a-5p	0.753737	5.81179e-09	1.295	0	3.649	2.294	5.805	0.577801	0.519974	-0.142	0.52	0.867	0.563	1.338	0.663162	7.119e-06	0.687	0	1.987	1.464	2.697
ANXA1_TPST1_PSMB10_DLEU1_PSORS1C3_HCP5_hsa-miR-193a-5p_hsa-miR-497-5p	0.77303	4.56267e-10	1.389	0	4.013	2.51	6.416	0.562148	0.81474	-0.051	0.815	0.95	0.62	1.457	0.672508	2.76283e-05	0.642	0	1.9	1.4	2.579
ANXA1_TPST1_PSMB10_DLEU1_PSORS1C3_HCP5_hsa-miR-181a-5p_hsa-miR-497-5p	0.76101	9.28767e-11	1.449	0	4.26	2.655	6.836	0.591714	0.744548	-0.072	0.744	0.931	0.606	1.431	0.67774	7.33944e-08	0.83	0	2.293	1.68	3.128
ANXA1_TPST1_PSMB10_DLEU1_PSORS1C3_hsa-miR-193a-5p_hsa-miR-181a-5p_hsa-miR-497-5p	0.763131	2.30937e-11	1.494	0	4.455	2.773	7.156	0.580051	0.633842	-0.105	0.633	0.901	0.586	1.384	0.662756	1.08044e-05	0.671	0	1.956	1.443	2.651
ANXA1_TPST1_PSMB10_DLEU1_HCP5_hsa-miR-193a-5p_hsa-miR-181a-5p_hsa-miR-497-5p	0.772626	1.42442e-12	1.607	0	4.986	3.065	8.111	0.466087	0.652233	-0.099	0.652	0.906	0.591	1.39	0.691175	3.53647e-08	0.849	0	2.337	1.713	3.188
ANXA1_TPST1_PSMB10_PSORS1C3_HCP5_hsa-miR-193a-5p_hsa-miR-181a-5p_hsa-miR-497-5p	0.761515	9.12506e-10	1.354	0	3.871	2.435	6.156	0.564706	0.363449	-0.199	0.364	0.82	0.534	1.259	0.659327	3.24743e-06	0.71	0	2.034	1.499	2.76
ANXA1_TPST1_DLEU1_PSORS1C3_HCP5_hsa-miR-193a-5p_hsa-miR-181a-5p_hsa-miR-497-5p	0.760404	4.35189e-08	1.207	0	3.344	2.118	5.279	0.559898	0.737814	0.073	0.739	1.075	0.702	1.646	0.667937	3.08088e-05	0.639	0	1.894	1.396	2.571
ANXA1_PSMB10_DLEU1_PSORS1C3_HCP5_hsa-miR-193a-5p_hsa-miR-181a-5p_hsa-miR-497-5p	0.757172	3.44499e-10	1.406	0	4.08	2.542	6.549	0.57821	0.490224	-0.152	0.489	0.859	0.558	1.322	0.648965	7.81651e-05	0.602	0	1.827	1.349	2.474
TPST1_PSMB10_DLEU1_PSORS1C3_HCP5_hsa-miR-193a-5p_hsa-miR-181a-5p_hsa-miR-497-5p	0.732727	3.99581e-11	1.494	0	4.453	2.764	7.175	0.635192	0.32848	-0.217	0.329	0.805	0.521	1.244	0.661892	4.56513e-06	0.709	0	2.032	1.491	2.769
ANXA1_TPST1_PSMB10_DLEU1_PSORS1C3_HCP5_hsa-miR-193a-5p_hsa-miR-181a-5p_hsa-miR-497-5p	0.767576	6.08552e-11	1.467	0	4.336	2.695	6.978	0.579847	0.490224	-0.152	0.489	0.859	0.558	1.322	0.669994	7.00988e-07	0.761	0	2.14	1.573	2.91
